# Supplementary material for: Macrophage depletion blocks congenital SARM1-dependent neuropathy
Source: PubMed Central journal article supplement (PMC9711884; doi:10.1172/jci159800), 2022-12-01
Supplement: jci-132-159800-s111.pdf [file jci-132-159800-s111.pdf]

TCACCAAAGTTGTTTCTCTCGCTTCCTCCTTCCCTCTCCCCCTTCCCCCCTCTCTTTAGATGGAAGTGAT  
TGTTGGGGACTTTGGGATCGTCGTGGTACCCAGGGATGCAGCGGACACAGACCGGATCATGAATCACTCC  
GCCATACTCCGCAAGTACAAAGTGAGTCCTCCA , 4

GEIC-Plate01-A02 TOTAL:3502 OrderedDict([('WT\_sp1', 1710), ('R232Q',  
0), ('Silent Block Mod', 1717), ('R232Q (Full ssODN)', 0), ('Silent  
Block Mod (Full ssODN)', 1575)]) [(0, 3491), (-1, 11)]  
TCACCAAAGTTGTTTCTCTCGCTTCCTCCTTCCCTCTCCCCCTTCCCCCCTCTCTTTAGATGGAAGTGAT  
TGTTGGGGACTTTGGGATCGTCGTGGTACCCAGGGATGCAGCGGACACAGACCGGATCATGAATCACTCC  
TCCATACTCCGCAAGTACAAAGTGAGTCCTCCA , 1564  
TCACCAAAGTTGTTTCTCTCGCTTCCTCCTTCCCTCTCCCCCTTCCCCCCTCTCTTTAGATGGAAGTGAT  
TGTTGGGGACTTTGGGATCGTCGTGGTACCCAGGGATGCAGCGGACACAGACCGGATCATGAATCACTCC  
TCCATACTCCGCAAGTACAAAGTGAGTCCTCCA , 1532  
TCACCAAAGTTGTTTCTCTCGCTTCCTCCTTCCCTCTCCCCCTTCCCCCCTCTCTTTAGATGGAAGTGAT  
TGTTGGGGACTTTGGGATCGTCGTGGTACCCAGGGATGCAGCGGACACAGACCGGATCATGAATCACTCC  
TCCATACTCCGCAAGTACAAAGTGAGTCCTCCA , 13  
TCACCAAAGTTGTTTCTCTCGCTTCCTCCTTCCCTCTCCCCCTTCCCCCCTCTCTTTAGATGGAAGTGAT  
TGTTGGGGACTTTGGGATCGTCGTGGTACCCAGGGATGCAGCGGACACAGACCGGATCATGAATCGCTCC  
TCCATACTCCGCAAGTACAAAGTGAGTCCTCCA , 13  
TCACCAAAGTTGTTTCTCTCGCTTCCTCCTTCCCTCTCCCCCTTCCCCCCTCTCTTTAGATGGAAGTGAT  
TGTTGGGGACTTTGGGATCGTCGTGGTACCCAGGGATGCAGCGGACACAGACCGGATCATGAATCACTCC  
TCCATACTCCGCAAGTACAAAGTGAGTCCTCCA , 5  
TCACCAAAGTTGTTTCTCTCGCTTCCTCCTTCCCTCTCCCCCTTCCCCCCTCTCTTTAGATGGAAGTGAT  
TGTTGGGGACTTTGGGATCGTCGTGGTACCCAGGGATGCAGCGGACACAGACCGGATCATGAATCACTCC  
TCCATACTCCGCAAGTACAAAGTGAGTCCTCCA , 5  
TCACCAAAGTTGTTTCTCTCGCTTCCTCCTTCCCTCTCCCCCTTCCCCCCTCTCTTTAGATGGAAGTGAT  
TGTTGGGGACTTTGGGATCGTCGTGGTACCCAGGGATGCAGCGGACACAGACCGGATCATGAATCACTCC  
TCCATACTCCGCAAGTACAAAGTGAGTCCTCCA , 5  
TCACCAAAGTTGTTTCTCTCGCTTCCTCCTTCCCTCTCCCCCTTCCCCCCTCTCTTTAGATGGAAGTGAT  
TGTTGGGGACTTTGGGATCGTCGTGGTACCCAGGGATGCAGCGGACACAGACCGGATCATGAATCACTCC  
TCCATACTCCGCAAGTACAAAGTGAGTCCTCCA , 4  
TCACCAAAGTTGTTTCTCTCGCTTCCTCCTTCCCTCTCCCCCTTCCCCCCTCTCTTTAGATGGAAGTGAT  
TGTTGGGGACTTTGGGATCGTCGTGGTACCCAGGGATGCAGCGGACACAGACCGGATCATGAATCACTCC  
TCCATGCTCCGCAAGTACAAAGTGAGTCCTCCA , 4  
TCACCAAAGTTGTTTCTCTCGCTTCCTCCTTCCCTCTCCCCCTTCCCCCCTCTCTTTAGATGGAAGTGAT  
TGTTGGGGACTTTGGGATCGTCGTGGTCCCCGTGATGCAGCGGACACAGACCGGATCATGAATCACTCC  
TCCATACTCCGCAAGTACAAAGTGAGTCCTCCA , 4  
TCACCAAAGTTGTTTCTCTCGCTTCCTCCTTCCCTCTCCCCCTTCCCCCCTCTCTTTAGATGGAAGTGAT  
TGTTGGGGACTTTGGGATCGTCGTGGTACCCAGGGATGCAGCGGACACAGACCGGATCATGAATCGCTCC  
TCCATACTCCGCAAGTACAAAGTGAGTCCTCCA , 3  
TCACCAAAGTTGTTTCTCTCGCTTCCTCCTTCCCTCTCCCCCTTCCCCCCTCTCTTTAGATGGGAGTGAT  
TGTTGGGGACTTTGGGATCGTCGTGGTACCCAGGGATGCAGCGGACACAGACCGGATCATGAATCACTCC  
TCCATACTCCGCAAGTACAAAGTGAGTCCTCCA , 3

GEIC-Plate01-A03 TOTAL:4089 OrderedDict([('WT\_sp1', 2044), ('R232Q',  
1), ('Silent Block Mod', 1952), ('R232Q (Full ssODN)', 1), ('Silent  
Block Mod (Full ssODN)', 1759)]) [(0, 4071), (-1, 13), (1, 3),  
(-2, 2)]

TCACCAAAGTTGTTTCTCTCGCTTCCTCCTTCCCTCTCCCCCTTCCCCCCTCTCTTTAGATGGAAGTGAT  
TGTTGGGGACTTTGGGATCGTCGTGGTACCCAGGGATGCAGCGGACACAGACCGGATCATGAATCACTCC  
TCCATACTCCGCAAGTACAAAGTGAGTCCTCCA , 1850  
TCACCAAAGTTGTTTCTCTCGCTTCCTCCTTCCCTCTCCCCCTTCCCCCCTCTCTTTAGATGGAAGTGAT  
TGTTGGGGACTTTGGGATCGTCGTGGTACCCCGTGATGCAGCGGACACAGACCGGATCATGAATCACTCC  
TCCATACTCCGCAAGTACAAAGTGAGTCCTCCA , 1740  
TCACCAAAGTTGTTTCTCTCGCTTCCTCCTTCCCTCTCCCCCTTCCCCCCTCTCTTTAGATGGAAGTGAT  
TGTTGGGGACTTTGGGATCGTCGTGGTACCCAGGGATGCAGCGGACACAGACCGGATCATGAATCACTCC  
TCCATACTCCGCAAGTACAAAGTGAGTCCTCCA , 12  
TCACCAAAGTTGTTTCTCTCGCTTCCTCCTTCCCTCTCCCCCTTCCCCCCTCTCTTTAGATGGAAGTGAT  
TGTTGGGGACTGTGGGATCGTCGTGGTACCCCGTGATGCAGCGGACACAGACCGGATCATGAATCACTCC  
TCCATACTCCGCAAGTACAAAGTGAGTCCTCCA , 9  
TCACCAAAGTTGTTTCTCTCGCTTCCTCCTTCCCTCTCCCCCTTCCCCCCTCTCTTTAGATGGAAGTGAT  
TGTTGGGGACTGTGGGATCGTCGTGGTACCCAGGGATGCAGCGGACACAGACCGGATCATGAATCACTCC  
TCCATACTCCGCAAGTACAAAGTGAGTCCTCCA , 8  
TCACCAAAGTTGTTTCTCTCGCTTCCTCCTTCCCTCTCCCCCTTCCCCCCTCTCTTTAGATGGAAGTGAT  
TGTTGGGGACTTTGGGATCGTCGTGGTACCCCGTGATGCAGCGGACACAGACCGGATCATGAATCGCTCC  
TCCATACTCCGCAAGTACAAAGTGAGTCCTCCA , 7  
TCACCAAAGTTGTTTCTCTCGCTTCCTCCTTCCCTCTCCCCCTTCCCCCCTCTCTTTAGATGGAAGTGAT  
TGTTGGGGACTGTGGGATCGTCGTGGTACCCCGTGATGCAGCGGACACAGACCGGATCATGAATCACTCC  
TCCATACTCCGCAAGTACAAAGTGAGTCCTCCA , 7  
TCACCAAAGTTGTTTCTCTCGCTTCCTCCTTCCCTCTCCCCCTTCCCCCCTCTCTTTAGATGGAAGTGAT  
TGTTGGGGACTTTGGGATCGTCGTGGTACCCAGTGATGCAGCGGACACAGACCGGATCATGAATCACTCC  
TCCATACTCCGCAAGTACAAAGTGAGTCCTCCA , 7  
TCACCAAAGTTGTTTCTCTCGCTTCCTCCTTCCCTCTCCCCCTTCCCCCCTCTCTTTAGATGGAAGTGAT  
TGTTGGGGACTTTGGGATCGTCGTGGTACCCCGTGATGCAGCGGACACAGACCGGATCATGAATCACTCC  
TCCATACTCCGCAAGTACAAAGTGAGTCCTCCA , 6  
TCACCAAAGTTGTTTCTCTCGCTTCCTCCTTCCCTCTCCCCCTTCCCCCCTCTCTTTAGATGGAAGTGAT  
TGTTGGGGACTTTGGGATCGTCGTGGTACCCCGTGATGCAGCGGACACAGACCGGATCATGAATCACTCC  
TCCATACTCTGCAAGTACAAAGTGAGTCCTCCA , 5  
TCACCAAAGTTGTTTCTCTCGCTTCCTCCTTCCCTCTCCCCCTTCCCCCCTCTCTTTAGATGGAAGTGAT  
TGTTGGGGACTTTGGGATCGTCGTGGTACCCAGGGATGCAGCGGACACAGACCGGATCATGAATCGCTCC  
TCCATACTCCGCAAGTACAAAGTGAGTCCTCCA , 5  
TCACCAAAGTTGTTTCTCTCGCTTCCTCCTTCCCTCTCCCCCTTCCCCCCTCTCTTTAGATGGAAGTGAT  
TGTTGGGGACTTTGGGATCGTCGTGGTACCCAGGGATGCAGCGGACACAGACCGATCATGAATCACTCC  
TCCATACTCCGCAAGTACAAAGTGAGTCCTCCA , 5

GEIC-Plate01-A04 TOTAL:3377 OrderedDict([('WT\_sp1', 3333), ('R232Q',  
0), ('Silent Block Mod', 0), ('R232Q (Full ssODN)', 0), ('Silent Block  
Mod (Full ssODN)', 0)]) [(0, 3361), (-1, 13), (-2, 2), (1, 1)]  
TCACCAAAGTTGTTTCTCTCGCTTCCTCCTTCCCTCTCCCCCTTCCCCCCTCTCTTTAGATGGAAGTGAT  
TGTTGGGGACTTTGGGATCGTCGTGGTACCCAGGGATGCAGCGGACACAGACCGGATCATGAATCACTCC  
TCCATACTCCGCAAGTACAAAGTGAGTCCTCCA , 2948  
TCACCAAAGTTGTTTCTCTCGCTTCCTCCTTCCCTCTCCCCCTTCCCCCCTCTCTTTAGATGGAAGTGAT  
TGTTGGGGACTTTGGGATCGTCGTGGTACCCAGGGATGCAGCGGACACAGACCGGATCATGAATCACTCC  
TCCATACTCCGCAAGTACAAAGTGAGTCCTCCA , 14  
TCACCAAAGTTGTTTCTCTCGCTTCCTCCTTCCCTCTCCCCCTTCCCCCCTCTCTTTAGATGGAAGTGAT  
TGTTGGGGACTTTGGGATCGTCGTGGTACCCAGGGATGCAGCGGACACAGACCGGATCATGAATCGCTCC  
TCCATACTCCGCAAGTACAAAGTGAGTCCTCCA , 12

TCACCAAAGTTGTTTCTCTCGCTTCCTCCTTCCCTCTCCCCCTTCCCCCCTCTCTTTAGATGGAAGTGAT  
TGTTGGGGACGTTGGGATCGTCGTGGTACCCAGGGATGCAGCGGACACAGACCGGATCATGAATCACTCC  
TCCATACTCCGCAAGTACAAAGTGAGTCCTCCA , 10  
TCACCAAAGTTGTTTCTCTCGCTTCCTCCTTCCCTCTCCCCCTTCCCCCCTCTCTTTAGATGGAAGTGAT  
TGTTGGGGACTGTGGGATCGTCGTGGTACCCAGGGATGCAGCGGACACAGACCGGATCATGAATCACTCC  
TCCATACTCCGCAAGTACAAAGTGAGTCCTCCA , 9  
TCACCAAAGTTGTTTCTCTCGCTTCCTCCTTCCCTCTCCCCCTTCCCCCCTCTCTTTAGATGGAAGTGAT  
TGTTGGGGACTTTGGGATCGTCGTGGTACCCAGGGATGCAGCGGACACAGACCGGATCATGAATCACTCC  
TCCATACGCCGCAAGTACAAAGTGAGTCCTCCA , 7  
TCACCAAAGTTGTTTCTCTCGCTTCCTCCTTCCCTCTCCCCCTTCCCCCCTCTCTTTAGATGGAAGTGAT  
TGTTGGGGACTTTGGGATCGTCGTGGTACCCAGGGATGCAGCGGACACAGGCCGGATCATGAATCACTCC  
TCCATACTCCGCAAGTACAAAGTGAGTCCTCCA , 6  
TCACCAAAGTTGTTTCTCTCGCTTCCTCCTTCCCTCTCCCCCTTCCCCCCTCTCTTTAGATGGAAGTGAT  
TGTTGGGGACTTTGGGATCGTCGTGGTACCCAGGGATGCAGCGGACACCGACCGGATCATGAATCACTCC  
TCCATACTCCGCAAGTACAAAGTGAGTCCTCCA , 6  
TCACCAAAGTTGTTTCTCTCGCTTCCTCCTTCCCTCTCCCCCTTCCCCCCTCTCTTTAGATGGAAGTGAT  
TGTTGGGGACTTTGGGATCGTCGTGGTACCCAGGGATGCAGCGGACACAGACCGGATCATGAATCACTCC  
TCCATACTCCGCAAGTACAAAGTGAGTCCTCCA , 5  
TCACCAAAGTTGTTTCTCTCGCTTCCTCCTTCCCTCTCCCCCTTCCCCCCTCTCTTTAGATGGAAGTGGT  
TGTTGGGGACTTTGGGATCGTCGTGGTACCCAGGGATGCAGCGGACACAGACCGGATCATGAATCACTCC  
TCCATACTCCGCAAGTACAAAGTGAGTCCTCCA , 5  
TCACCAAAGTTGTTTCTCTCGCTTCCTCCTTCCCTCTCCCCCTTCCCCCCTCTCTTTAGATGGAAGTGAT  
TGTTGGGGACTTTGGGATCGTCGTGGTACCCAGGGATGCAGCGGACACAGACCGGATCATGAATCACTCC  
TCCATGCTCCGCAAGTACAAAGTGAGTCCTCCA , 4  
TCACCAAAGTTGTTTCTCTCGCTTCCTCCTTCCCTCTCCCCCTTCCCCCCTCTCTTTAGATGGAAGTGAT  
TGTTGGGGACTTTGGGATCGTCGTGGTACCCAGGGATGCAGCGGACACAGACCGGTTTTCATGAATCACTCC  
TCCATACTCCGCAAGTACAAAGTGAGTCCTCCA , 4

GEIC-Plate01-A05 TOTAL:3458 OrderedDict([('WT\_sp1', 1757), ('R232Q', 0), ('Silent Block Mod', 1607), ('R232Q (Full ssODN)', 0), ('Silent Block Mod (Full ssODN)', 1436)]) [(0, 3441), (-1, 12), (-2, 3), (1, 1), (-3, 1)]  
TCACCAAAGTTGTTTCTCTCGCTTCCTCCTTCCCTCTCCCCCTTCCCCCCTCTCTTTAGATGGAAGTGAT  
TGTTGGGGACTTTGGGATCGTCGTGGTACCCAGGGATGCAGCGGACACAGACCGGATCATGAATCACTCC  
TCCATACTCCGCAAGTACAAAGTGAGTCCTCCA , 1534  
TCACCAAAGTTGTTTCTCTCGCTTCCTCCTTCCCTCTCCCCCTTCCCCCCTCTCTTTAGATGGAAGTGAT  
TGTTGGGGACTTTGGGATCGTCGTGGTACCCCGTGATGCAGCGGACACAGACCGGATCATGAATCACTCC  
TCCATACTCCGCAAGTACAAAGTGAGTCCTCCA , 1419  
TCACCAAAGTTGTTTCTCTCGCTTCCTCCTTCCCTCTCCCCCTTCCCCCCTCTCTTTAGATGGAAGTGAT  
TGTTGGGGACTGTGGGATCGTCGTGGTACCCAGGGATGCAGCGGACACAGACCGGATCATGAATCACTCC  
TCCATACTCCGCAAGTACAAAGTGAGTCCTCCA , 12  
TCACCAAAGTTGTTTCTCTCGCTTCCTCCTTCCCTCTCCCCCTTCCCCCCTCTCTTTAGATGGAAGTGAT  
TGTTGGGGACGTTGGGATCGTCGTGGTACCCAGGGATGCAGCGGACACAGACCGGATCATGAATCACTCC  
TCCATACTCCGCAAGTACAAAGTGAGTCCTCCA , 10  
TCACCAAAGTTGTTTCTCTCGCTTCCTCCTTCCCTCTCCCCCTTCCCCCCTCTCTTTAGATGGAAGTGAT  
TGTTGGGGACGTTGGGATCGTCGTGGTACCCCGTGATGCAGCGGACACAGACCGGATCATGAATCACTCC  
TCCATACTCCGCAAGTACAAAGTGAGTCCTCCA , 10  
TCACCAAAGTTGTTTCTCTCGCTTCCTCCTTCCCTCTCCCCCTTCCCCCCTCTCTTTAGATGGAAGTGAT  
TGTTGGGGACTTTGGGATCGTCGTGGTACCCCGTGATGCAGCGGACACAGACCGGATCATGAATCGCTCC

TCCATACTCCGCAAGTACAAAGTGAGTCCTCCA , 9  
TCACCAAAGTTGTTTCTCTCGCTTCCTCCTTCCCTCTCCCCCTTCCCCCCTCTCTTTAGATGGAAGTGAT  
TGTTGGGGACTTTGGGATCGTCGTGGTACCCAGGGATGCAGCGGACACGGACCGGATCATGAATCACTCC  
TCCATACTCCGCAAGTACAAAGTGAGTCCTCCA , 8  
TCACCAAAGTTGTTTCTCTCGCTTCCTCCTTCCCTCTCCCCCTTCCCCCCTCTCTTTAGATGGAAGTGAT  
TGTTGGGGACTTTGGGATCGTCGTGGTACCCAGGGATGCAGCGGACACAGACCGGATCATGAATCACTCC  
TCCATACTCCGCAAGTACAAAGTGAGTCCTCCA , 6  
TCACCAAAGTTGTTTCTCTCGCTTCCTCCTTCCCTCTCCCCCTTCCCCCCTCTCTTTAGATGGAAGTGAT  
TGTTGGGGACTTTGGGATCGTCGTGGTACCCAGGGATGCAGCGGACACAGACCGGATCATGAATCACTCC  
TCCATACTCCGCAAGTACAAAGTGAGTCCTCCA , 6  
TCACCAAAGTTGTTTCTCTCGCTTCCTCCTTCCCTCTCCCCCTTCCCCCCTCTCTTTAGATGGAAGTGAT  
TGTTGGGGACTTTGGGATCGTCGTGGTACCCAGGGATGCAGCGGACACAGACCGGATCATGAATCACTCC  
TCCATACTCCGCAAGTACAAAGTGAGTCCTCCA , 5  
TCACCAAAGTTGTTTCTCTCGCTTCCTCCTTCCCTCTCCCCCTTCCCCCCTCTCTTTAGATGGAAGTGAT  
TGTTGGGGACTTTGGGATCGTCGTGGTACCCAGGGATGCAGCGGACACAGACCGGATCATGAATCACTCC  
TCCATACTCCGCAAGTACAAAGTGAGTCCTCCA , 5

GEIC-Plate01-A06 TOTAL:3210 OrderedDict([('WT\_sp1', 1559), ('R232Q', 1), ('Silent Block Mod', 1598), ('R232Q (Full ssODN)', 1), ('Silent Block Mod (Full ssODN)', 1452)]) [(0, 3193), (-1, 16), (1, 1)]  
TCACCAAAGTTGTTTCTCTCGCTTCCTCCTTCCCTCTCCCCCTTCCCCCCTCTCTTTAGATGGAAGTGAT  
TGTTGGGGACTTTGGGATCGTCGTGGTACCCAGGGATGCAGCGGACACAGACCGGATCATGAATCACTCC  
TCCATACTCCGCAAGTACAAAGTGAGTCCTCCA , 1435  
TCACCAAAGTTGTTTCTCTCGCTTCCTCCTTCCCTCTCCCCCTTCCCCCCTCTCTTTAGATGGAAGTGAT  
TGTTGGGGACTTTGGGATCGTCGTGGTACCCAGGGATGCAGCGGACACAGACCGGATCATGAATCACTCC  
TCCATACTCCGCAAGTACAAAGTGAGTCCTCCA , 1368  
TCACCAAAGTTGTTTCTCTCGCTTCCTCCTTCCCTCTCCCCCTTCCCCCCTCTCTTTAGATGGAAGTGAT  
TGTTGGGGACTTTGGGATCGTCGTGGTACCCAGGGATGCAGCGGACACGGACCGGATCATGAATCACTCC  
TCCATACTCCGCAAGTACAAAGTGAGTCCTCCA , 11  
TCACCAAAGTTGTTTCTCTCGCTTCCTCCTTCCCTCTCCCCCTTCCCCCCTCTCTTTAGATGGAAGTGAT  
TGTTGGGGACTTTGGGATCGTCGTGGTACCCAGGGATGCAGCGGACACAGACCGGATCATGAATCGCTCC  
TCCATACTCCGCAAGTACAAAGTGAGTCCTCCA , 8  
TCACCAAAGTTGTTTCTCTCGCTTCCTCCTTCCCTCTCCCCCTTCCCCCCTCTCTTTAGATGGAAGTGAT  
TGTTGGGGACTTTGGGATCGTCGTGGTACCCAGGGATGCAGCGGACACAGACCGGATCATGAATCACTCC  
TCCATACTCCGCAAGTACAAAGTGAGTCCTCCA , 7  
TCACCAAAGTTGTTTCTCTCGCTTCCTCCTTCCCTCTCCCCCTTCCCCCCTCTCTTTAGATGGAAGTGAT  
TGTTGGGGACTTTGGGATCGTCGTGGTACCCAGGGATGCAGCGGACACAGACCGGATCATGAATCACTCC  
TCCATACTCCGCAAGTACAAAGTGAGTCCTCCA , 7  
TCACCAAAGTTGTTTCTCTCGCTTCCTCCTTCCCTCTCCCCCTTCCCCCCTCTCTTTAGATGGAAGTGAT  
TGTTGGGGACTTTGGGATCGTCGTGGTACCCAGGGATGCAGCGGACACAGACCGGATCATGAATCACTCC  
TCCATACTCCGCAAGTACAAAGTGAGTCCTCCA , 5  
TCACCAAAGTTGTTTCTCTCGCTTCCTCCTTCCCTCTCCCCCTTCCCCCCTCTCTTTAGATGGAAGTGAT  
TGTTGGGGACTTTGGGATCGTCGTGGTACCCAGGGATGCAGCGGACACAGACCGGATCATGAATCACTCC  
TCCATACTCCGCAAGTACAAAGTGAGTCCTCCA , 5  
TCACCAAAGTTGTTTCTCTCGCTTCCTCCTTCCCTCTCCCCCTTCCCCCCTCTCTTTAGATGGAAGTGAT  
TGTTGGGGACTTTGGGATCGTCGTGGTACCCAGGGATGCAGCGGACACAGACCGGATCATGAATCGCTCC

TCCATACTCCGCAAGTACAAAGTGAGTCCTCCA , 4  
TCACCAAAGTTGTTTCTCTCGCTTCCTCCTTCCCTCTCCCCCTTCCCCCCTCTCTTTAGATGGAAGTGAT  
TGTTGGGGACTTTGGGATCGTCGTGGTACCCAGGGATGCAGCGGACACAGACCGGATCATGAATCACTCC  
TCCATGCTCCGCAAGTACAAAGTGAGTCCTCCA , 4  
TCACCAAAGTTGTTTCTCTCGCTTCCTCCTTCCCTCTCCCCCTTCCCCCCTCTCTTTAGATGGAAGTGAT  
TGTTGGGGACTTTGGGATCGTCGTGGTACCCAGGGATGCAGCGGACACAGACCGGATCATGAATCACTCC  
TCCATACGCCGCAAGTACAAAGTGAGTCCTCCA , 4  
TCACCAAAGTTGTTTCTCTCGCTTCCTCCTTCCCTCTCCCCCTTCCCCCCTCTCTTTAGATGGAAGTGAG  
TGTTGGGGACTTTGGGATCGTCGTGGTACCCAGGGATGCAGCGGACACAGACCGGATCATGAATCACTCC  
TCCATACTCCGCAAGTACAAAGTGAGTCCTCCA , 4

GEIC-Plate01-A07 TOTAL:3347 OrderedDict([('WT\_sp1', 1672), ('R232Q', 1), ('Silent Block Mod', 1606), ('R232Q (Full ssODN)', 1), ('Silent Block Mod (Full ssODN)', 1444)]) [(0, 3332), (-1, 13), (-37, 1), (-2, 1)]

TCACCAAAGTTGTTTCTCTCGCTTCCTCCTTCCCTCTCCCCCTTCCCCCCTCTCTTTAGATGGAAGTGAT  
TGTTGGGGACTTTGGGATCGTCGTGGTACCCAGGGATGCAGCGGACACAGACCGGATCATGAATCACTCC  
TCCATACTCCGCAAGTACAAAGTGAGTCCTCCA , 1458  
TCACCAAAGTTGTTTCTCTCGCTTCCTCCTTCCCTCTCCCCCTTCCCCCCTCTCTTTAGATGGAAGTGAT  
TGTTGGGGACTTTGGGATCGTCGTGGTACCCCGTGATGCAGCGGACACAGACCGGATCATGAATCACTCC  
TCCATACTCCGCAAGTACAAAGTGAGTCCTCCA , 1429  
TCACCAAAGTTGTTTCTCTCGCTTCCTCCTTCCCTCTCCCCCTTCCCCCCTCTCTTTAGATGGAAGTGAT  
TGTTGGGGACTTTGGGATCGTCGTGGTACCCAGGGATGCAGCGGACACGGACCGGATCATGAATCACTCC  
TCCATACTCCGCAAGTACAAAGTGAGTCCTCCA , 15  
TCACCAAAGTTGTTTCTCTCGCTTCCTCCTTCCCTCTCCCCCTTCCCCCCTCTCTTTAGATGGAAGTGAT  
TGTTGGGGACGTTGGGATCGTCGTGGTACCCAGGGATGCAGCGGACACAGACCGGATCATGAATCACTCC  
TCCATACTCCGCAAGTACAAAGTGAGTCCTCCA , 13  
TCACCAAAGTTGTTTCTCTCGCTTCCTCCTTCCCTCTCCCCCTTCCCCCCTCTCTTTAGATGGAAGTGAT  
TGTTGGGGACGTTGGGATCGTCGTGGTACCCCGTGATGCAGCGGACACAGACCGGATCATGAATCACTCC  
TCCATACTCCGCAAGTACAAAGTGAGTCCTCCA , 11  
TCACCAAAGTTGTTTCTCTCGCTTCCTCCTTCCCTCTCCCCCTTCCCCCCTCTCTTTAGATGGAAGTGAT  
TGTTGGGGACTTTGGGATCGTCGTGGTACCCCGTGATGCAGCGGACACAGACCGGATCATGAATCGCTCC  
TCCATACTCCGCAAGTACAAAGTGAGTCCTCCA , 11  
TCACCAAAGTTGTTTCTCTCGCTTCCTCCTTCCCTCTCCCCCTTCCCCCCTCTCTTTAGATGGAAGTGAT  
TGTTGGGGACTGTGGGATCGTCGTGGTACCCCGTGATGCAGCGGACACAGACCGGATCATGAATCACTCC  
TCCATACTCCGCAAGTACAAAGTGAGTCCTCCA , 8  
TCACCAAAGTTGTTTCTCTCGCTTCCTCCTTCCCTCTCCCCCTTCCCCCCTCTCTTTAGATGGAAGTGAT  
TGTTGGGGACTTTGGGATCGTCGTGGTACCCAGGGATGCAGCGGACACAGACCGGATCATGAATCGCTCC  
TCCATACTCCGCAAGTACAAAGTGAGTCCTCCA , 6  
TCACCAAAGTTGTTTCTCTCGCTTCCTCCTTCCCTCTCCCCCTTCCCCCCTCTCTTTAGATGGAAGTGAT  
TGTTGGGGACTGTGGGATCGTCGTGGTACCCAGGGATGCAGCGGACACAGACCGGATCATGAATCACTCC  
TCCATACTCCGCAAGTACAAAGTGAGTCCTCCA , 6  
TCACCAAAGTTGTTTCTCTCGCTTCCTCCTTCCCTCTCCCCCTTCCCCCCTCTCTTTAGATGGAAGTGAT  
TGTTGGGGACTTTGGGATCGTCGTGGTACCCAGTGATGCAGCGGACACAGACCGGATCATGAATCACTCC  
TCCATACTCCGCAAGTACAAAGTGAGTCCTCCA , 5  
TCACCAAAGTTGTTTCTCTCGCTTCCTCCTTCCCTCTCCCCCTTCCCCCCTCTCTTTAGATGGAAGTGAT  
TGTTGGGGACTTTGGGATCGTCGTGGTACCCCGTGATGCAGCGGACACAGACCGGATCATGAATCACTCC  
TCCATACTCCGCAAGTACCAAGTGAGTCCTCCA , 5  
TCACCAAAGTTGTTTCTCTCGCTTCCTCCTTCCCTCTCCCCCTTCCCCCCTCTCTTTAGATGGAAGTGAT

TGTTGGGGACTTTGGGATCGTCGTGGTACCCCGTGATGCAGCGGACACAGACCCGGATCATGAATCACTCC  
TCCATACGCCGCAAGTACAAAGTGAGTCCTCCA , 5

GEIC-Plate01-A08 TOTAL:3553 OrderedDict([('WT\_sp1', 3493), ('R232Q',  
0), ('Silent Block Mod', 0), ('R232Q (Full ssODN)', 0), ('Silent Block  
Mod (Full ssODN)', 0)]) [(0, 3544), (-1, 9)]

TCACCAAAGTTGTTTCTCTCGTTCCCTCCTTCCCTCTCCCCCTTCCCCCCTCTCTTTAGATGGAAGTGAT  
TGTTGGGGACTTTGGGATCGTCGTGGTACCCAGGGATGCAGCGGACACAGACCCGGATCATGAATCACTCC  
TCCATACTCCGCAAGTACAAAGTGAGTCCTCCA , 3092

TCACCAAAGTTGTTTCTCTCGTTCCCTCCTTCCCTCTCCCCCTTCCCCCCTCTCTTTAGATGGAAGTGAT  
TGTTGGGGACTTTGGGATCGTCGTGGTACCCAGGGATGCAGCGGACACAGACCCGGATCATGAATCACTCC  
TCCATACTCCGCAAGTACAAAGTGAGTCCTCCA , 26

TCACCAAAGTTGTTTCTCTCGTTCCCTCCTTCCCTCTCCCCCTTCCCCCCTCTCTTTAGATGGAAGTGAT  
TGTTGGGGACTTTGGGATCGTCGTGGTACCCAGGGATGCAGCGGACACAGACCCGGATCATGAATCACTCC  
TCCATACGCCGCAAGTACAAAGTGAGTCCTCCA , 12

TCACCAAAGTTGTTTCTCTCGTTCCCTCCTTCCCTCTCCCCCTTCCCCCCTCTCTTTAGATGGAAGTGAT  
TGTTGGGGACTTTGGGATCGTCGTGGTACCCAGGGATGCAGCGGACACAGACCCGGATCATGAATCGCTCC  
TCCATACTCCGCAAGTACAAAGTGAGTCCTCCA , 11

TCACCAAAGTTGTTTCTCTCGTTCCCTCCTTCCCTCTCCCCCTTCCCCCCTCTCTTTAGATGGAAGTGAT  
TGTTGGGGACTTTGGGATCGTCGTGGTACCCAGGGATGCAGCGGACACAGACCCGGATCATGAATCACTCC  
TCCATGCTCCGCAAGTACAAAGTGAGTCCTCCA , 8

TCACCAAAGTTGTTTCTCTCGTTCCCTCCTTCCCTCTCCCCCTTCCCCCCTCTCTTTAGATGGAAGTGAT  
TGTTGGGGACTGTGGGATCGTCGTGGTACCCAGGGATGCAGCGGACACAGACCCGGATCATGAATCACTCC  
TCCATACTCCGCAAGTACAAAGTGAGTCCTCCA , 8

TCACCAAAGTTGTTTCTCTCGTTCCCTCCTTCCCTCTCCCCCTTCCCCCCTCTCTTTAGATGGAAGTGAT  
TGTTGGGGACGTTGGGATCGTCGTGGTACCCAGGGATGCAGCGGACACAGACCCGGATCATGAATCACTCC  
TCCATACTCCGCAAGTACAAAGTGAGTCCTCCA , 7

TCACCAAAGTTGTTTCTCTCGTTCCCTCCTTCCCTCTCCCCCTTCCCCCCTCTCTTTAGATGGAAGTGAT  
TGTTGGGGACTTTGGGATCGTCGTGGTACCCAGGGATGCAGCGGACACAGACCCGGATCATGAATCACTCC  
GCCATACTCCGCAAGTACAAAGTGAGTCCTCCA , 7

TCACCAAAGTTGTTTCTCTCGTTCCCTCCTTCCCTCTCCCCCTTCCCCCCTCTCTTTAGATGGAAGTGAT  
TGTTGGGGACTTTGGGATCGTCGTGGTACCCAGGGATGCAGCGGACACAGACCCGGATCATGAATCACTCC  
TCCATACTCCGCAAGTACAAAGTGAGTCCTCCA , 6

TCACCAAAGTTGTTTCTCTCGTTCCCTCCTTCCCTCTCCCCCTTCCCCCCTCTCTTTAGATGGAAGTGAT  
TGTTGGGAGACTTTGGGATCGTCGTGGTACCCAGGGATGCAGCGGACACAGACCCGGATCATGAATCACTCC  
TCCATACTCCGCAAGTACAAAGTGAGTCCTCCA , 4

TCACCAAAGTTGTTTCTCTCGTTCCCTCCTTCCCTCTCCCCCTTCCCCCCTCTCTTTAGATGGAAGTGAT  
TGTTGGGGACTTTGGGATCGTCGTGGTACCCAGGGATGCAGCGGACACAGACCCGGATCATGAATCACGCC  
TCCATACTCCGCAAGTACAAAGTGAGTCCTCCA , 4

TCACCAAAGTTGTTTCTCTCGTTCCCTCCTTCCCTCTCCCCCTTCCCCCCTCTCTTTAGATGGAAGTGAT  
TGTTGGGGACTTTGGGATCGTCGTGGTGCAGGGATGCAGCGGACACAGACCCGGATCATGAATCACTCC  
TCCATACTCCGCAAGTACAAAGTGAGTCCTCCA , 4

GEIC-Plate01-B01 TOTAL:3985 OrderedDict([('WT\_sp1', 3922), ('R232Q',  
0), ('Silent Block Mod', 0), ('R232Q (Full ssODN)', 0), ('Silent Block  
Mod (Full ssODN)', 0)]) [(0, 3964), (-1, 18), (1, 2), (-3, 1)]

TCACCAAAGTTGTTTCTCTCGTTCCCTCCTTCCCTCTCCCCCTTCCCCCCTCTCTTTAGATGGAAGTGAT  
TGTTGGGGACTTTGGGATCGTCGTGGTACCCAGGGATGCAGCGGACACAGACCCGGATCATGAATCACTCC

TCCATACTCCGCAAGTACAAAGTGAGTCCTCCA , 3483  
TCACCAAAGTTGTTTCTCTCGCTTCCTCCTTCCCTCTCCCCCTTCCCCCCTCTCTTTAGATGGAAGTGAT  
TGTTGGGGACTTTGGGATCGTCGTGGTACCCAGGGATGCAGCGGACACAGACCGGATCATGAATCACTCC  
TCCATACTCCGCAAGTACAAAGTGAGTCCTCCA , 25  
TCACCAAAGTTGTTTCTCTCGCTTCCTCCTTCCCTCTCCCCCTTCCCCCCTCTCTTTAGATGGAAGTGAT  
TGTTGGGGACTGTGGGATCGTCGTGGTACCCAGGGATGCAGCGGACACAGACCGGATCATGAATCACTCC  
TCCATACTCCGCAAGTACAAAGTGAGTCCTCCA , 13  
TCACCAAAGTTGTTTCTCTCGCTTCCTCCTTCCCTCTCCCCCTTCCCCCCTCTCTTTAGATGGAAGTGAT  
TGTTGGGGACTTTGGGATCGTCGTGGTACCCAGGGATGCAGCGGACACAGACCGGATCATGAATCGCTCC  
TCCATACTCCGCAAGTACAAAGTGAGTCCTCCA , 12  
TCACCAAAGTTGTTTCTCTCGCTTCCTCCTTCCCTCTCCCCCTTCCCCCCTCTCTTTAGATGGAAGTGAT  
TGTTGGGGACTTTGGGATCGTCGTGGTACCCAGGGATGCAGCGGACACAGACCGGATCATGAATCACTCC  
TCCATGCTCCGCAAGTACAAAGTGAGTCCTCCA , 11  
TCACCAAAGTTGTTTCTCTCGCTTCCTCCTTCCCTCTCCCCCTTCCCCCCTCTCTTTAGATGGAAGTGAT  
TGTTGGGGACTTTGGGATCGTCGTGGTACCCAGGGATGCAGCGGACACCGACCGGATCATGAATCACTCC  
TCCATACTCCGCAAGTACAAAGTGAGTCCTCCA , 9  
TCACCAAAGTTGTTTCTCTCGCTTCCTCCTTCCCTCTCCCCCTTCCCCCCTCTCTTTAGATGGAAGTGAT  
TGTTGGGGACTTTGGGATCGTCGTGGTACCCAGGGATGCAGCGGACACAGACCGGATCATGAATCACTCC  
TCCATACGCCGCAAGTACAAAGTGAGTCCTCCA , 6  
TCACCAAAGTTGTTTCTCTCGCTTCCTCCTTCCCTCTCCCCCTTCCCCCCTCTCTTTAGATGGAAGTGAT  
TGTTGGGGACTTTGGGATCGTCGTGGTACCCAGGGATGCAGCGGACACAGACCAGATCATGAATCACTCC  
TCCATACTCCGCAAGTACAAAGTGAGTCCTCCA , 6  
TCACCAAAGTTGTTTCTCTCGCTTCCTCCTTCCCTCTCCCCCTTCCCCCCTCTCTTTAGATGGAAGTGAT  
TGTTGGGGACTTTGGGATCGTCGTGGTACCCAGGGATGCAGCGGACACAGACCGGATCATGAATCACTCC  
TCCATACTCCGCAAGTACCAAGTGAGTCCTCCA , 6  
TCACCAAAGTTGTTTCTCTCGCTTCCTCCTTCCCTCTCCCCCTTCCCCCCTCTCTTTAGATGGAAGTGAT  
TGTTGGGGACTTTGGGATCGTCGTGGTACCCAGTGATGCAGCGGACACAGACCGGATCATGAATCACTCC  
TCCATACTCCGCAAGTACAAAGTGAGTCCTCCA , 4  
TCACCAAAGTTGTTTCTCTCGCTTCCTCCTTCCCTCTCCCCCTTCCCCCCTCTCTTTAGATGGAAGTGATT  
GTTGGGGACTTTGGGATCGTCGTGGTACCCAGGGATGCAGCGGACACAGACCGGATCATGAATCACTCCT  
CCATACTCCGCAAGTACAAAGTGAGTCCTCCA , 4  
TCACCAAAGTTGTTTCTCTCGCTTCCTCCTTCCCTCTCCCCCTTCCCCCCTCTCTTTAGATGGAAGTGAG  
TGTTGGGGACTTTGGGATCGTCGTGGTACCCAGGGATGCAGCGGACACAGACCGGATCATGAATCACTCC  
TCCATACTCCGCAAGTACAAAGTGAGTCCTCCA , 4

GEIC-Plate01-B02 TOTAL:2724 OrderedDict([('WT\_sp1', 1344), ('R232Q',  
0), ('Silent Block Mod', 1323), ('R232Q (Full ssODN)', 0), ('Silent  
Block Mod (Full ssODN)', 1230)]) [(0, 2715), (-1, 8), (1, 1)]  
TCACCAAAGTTGTTTCTCTCGCTTCCTCCTTCCCTCTCCCCCTTCCCCCCTCTCTTTAGATGGAAGTGAT  
TGTTGGGGACTTTGGGATCGTCGTGGTACCCCGTGATGCAGCGGACACAGACCGGATCATGAATCACTCC  
TCCATACTCCGCAAGTACAAAGTGAGTCCTCCA , 1217  
TCACCAAAGTTGTTTCTCTCGCTTCCTCCTTCCCTCTCCCCCTTCCCCCCTCTCTTTAGATGGAAGTGAT  
TGTTGGGGACTTTGGGATCGTCGTGGTACCCAGGGATGCAGCGGACACAGACCGGATCATGAATCACTCC  
TCCATACTCCGCAAGTACAAAGTGAGTCCTCCA , 1200  
TCACCAAAGTTGTTTCTCTCGCTTCCTCCTTCCCTCTCCCCCTTCCCCCCTCTCTTTAGATGGAAGTGAT  
TGTTGGGGACTGTGGGATCGTCGTGGTACCCCGTGATGCAGCGGACACAGACCGGATCATGAATCACTCC  
TCCATACTCCGCAAGTACAAAGTGAGTCCTCCA , 7  
TCACCAAAGTTGTTTCTCTCGCTTCCTCCTTCCCTCTCCCCCTTCCCCCCTCTCTTTAGATGGAAGTGAT  
TGTTGGGGACTTTGGGATCGTCGTGGTACCCAGGGATGCAGCGGACACAGACCGGATCATGAATCACTCC

TCCATACTCCGCAAGTACAAAGTGAGTCCTCCA , 6  
TCACCAAAGTTGTTTCTCTCGCTTCCTCCTTCCCTCTCCCCCTTCCCCCCTCTCTTTAGATGGAAGTGAT  
TGTTGGGGACTGTGGGATCGTCGTGGTACCCAGGGATGCAGCGGACACAGACCGGATCATGAATCACTCC  
TCCATACTCCGCAAGTACAAAGTGAGTCCTCCA , 6  
TCACCAAAGTTGTTTCTCTCGCTTCCTCCTTCCCTCTCCCCCTTCCCCCCTCTCTTTAGATGGAAGTGAT  
TGTTGGGGACTTTGGGATCGTCGTGGTCCCCGTGATGCAGCGGACACAGACCGGATCATGAATCACTCC  
TCCATACTCCGCAAGTACAAAGTGAGTCCTCCA , 6  
TCACCAAAGTTGTTTCTCTCGCTTCCTCCTTCCCTCTCCCCCTTCCCCCCTCTCTTTAGATGGAAGTGAT  
TGTTGGGGACTTTGGGATCGTCGTGGTACCCAGTGATGCAGCGGACACAGACCGGATCATGAATCACTCC  
TCCATACTCCGCAAGTACAAAGTGAGTCCTCCA , 5  
TCACCAAAGTTGTTTCTCTCGCTTCCTCCTTCCCTCTCCCCCTTCCCCCCTCTCTTTAGATGGAAGTGAT  
TGTTGGGGACTTTGGGATCGTCGTGGTACCCAGTGATGCAGCGGACACAGACCGGATCATGAATCACTCC  
TCCATACTCCGCAAGTACAAAGTGAGTCCTCCA , 4  
TCACCAAAGTTGTTTCTCTCGCTTCCTCCTTCCCTCTCCCCCTTCCCCCCTCTCTTTAGATGGAAGTGAT  
TGTTGGGGACTTTGGGATCGTCGTGGTACCTCGTGATGCAGCGGACACAGACCGGATCATGAATCACTCC  
TCCATACTCCGCAAGTACAAAGTGAGTCCTCCA , 4  
TCACCAAAGTTGTTTCTCTCGCTTCCTCCTTCCCTCTCCCCCTTCCCCCCTCTCTTTAGATGGAAGTGAT  
TGTTGGGGACTTTGGGATCGTCGTGGTACCCCGTGATGCAGCGGACACAGACCGGATCATGAATCGCTCC  
TCCATACTCCGCAAGTACAAAGTGAGTCCTCCA , 4  
TCACCAAAGTTGTTTCTCTCGCTTCCTCCTTCCCTCTCCCCCTTCCCCCCTCTCTTTAGATGGAAGTGAT  
TGTTGGGGACTTTGGGATCGTCGTGGTACCCCGTGATGCAGCGGACACAGACCGGATCACGAATCACTCC  
TCCATACTCCGCAAGTACAAAGTGAGTCCTCCA , 3  
TCACCAAAGTTGTTTCTCTCGCTTCCTCCTTCCCTCTCCCCCTTCCCCCCTCTCTTTAGATGGAAGTGAT  
TGTTGGGGACTTTGGGATCGTCGTGGTACCCAGGGATGCAGCGGACACAGACCAGATCATGAATCACTCC  
TCCATACTCCGCAAGTACAAAGTGAGTCCTCCA , 3

GEIC-Plate01-B03 TOTAL:3996 OrderedDict([('WT\_sp1', 3914), ('R232Q', 0), ('Silent Block Mod', 0), ('R232Q (Full ssODN)', 0), ('Silent Block Mod (Full ssODN)', 0)]) [(0, 3981), (-1, 12), (-2, 2), (1, 1)]  
TCACCAAAGTTGTTTCTCTCGCTTCCTCCTTCCCTCTCCCCCTTCCCCCCTCTCTTTAGATGGAAGTGAT  
TGTTGGGGACTTTGGGATCGTCGTGGTACCCAGGGATGCAGCGGACACAGACCGGATCATGAATCACTCC  
TCCATACTCCGCAAGTACAAAGTGAGTCCTCCA , 3449  
TCACCAAAGTTGTTTCTCTCGCTTCCTCCTTCCCTCTCCCCCTTCCCCCCTCTCTTTAGATGGAAGTGAT  
TGTTGGGGACTTTGGGATCGTCGTGGTACCCAGGGATGCAGCGGACACAGACCGGATCATGAATCACTCC  
TCCATACTCCGCAAGTACAAAGTGAGTCCTCCA , 26  
TCACCAAAGTTGTTTCTCTCGCTTCCTCCTTCCCTCTCCCCCTTCCCCCCTCTCTTTAGATGGAAGTGAT  
TGTTGGGGACTGTGGGATCGTCGTGGTACCCAGGGATGCAGCGGACACAGACCGGATCATGAATCACTCC  
TCCATACTCCGCAAGTACAAAGTGAGTCCTCCA , 15  
TCACCAAAGTTGTTTCTCTCGCTTCCTCCTTCCCTCTCCCCCTTCCCCCCTCTCTTTAGATGGAAGTGAT  
TGTTGGGGACGTTGGGATCGTCGTGGTACCCAGGGATGCAGCGGACACAGACCGGATCATGAATCACTCC  
TCCATACTCCGCAAGTACAAAGTGAGTCCTCCA , 13  
TCACCAAAGTTGTTTCTCTCGCTTCCTCCTTCCCTCTCCCCCTTCCCCCCTCTCTTTAGATGGAAGTGAT  
TGTTGGGGACTTTGGGATCGTCGTGGTACCCAGGGATGCAGCGGACACAGACCGGATCATGAATCGCTCC  
TCCATACTCCGCAAGTACAAAGTGAGTCCTCCA , 9  
TCACCAAAGTTGTTTCTCTCGCTTCCTCCTTCCCTCTCCCCCTTCCCCCCTCTCTTTAGATGGAAGTGAT  
TGTTGGGGACTTTGGGATCGTCGTGGTACCCAGGGATGCAGCGGACACAGACCGGATCATGAATCACTCC  
TCCATACTCCGCAAGTACAAAGTGAGTCCTCCA , 6  
TCACCAAAGTTGTTTCTCTCGCTTCCTCCTTCCCTCTCCCCCTTCCCCCCTCTCTTTAGATGGAAGTGAT  
TGTTGGGGACTTTGGGATCGTCGTGGTACCCAGGGATGCAGCGGACACAGACCGGATCATGAATCACTCC

TCCATACGCCGCAAGTACAAAGTGAGTCCTCCA , 6  
TCACCAAAGTTGTTTCTCTCGCTTCCTCCTTCCCTCTCCCCCTTCCCCCCTCTCTTTAGATGGAAGTGAT  
TGTTGGGGACTTTGGGATCGTCGTGGTAACCAGGGATGCAGCGGACACAGACCGGATCATGAATCACTCC  
TCCATACTCCGCAAGTACAAAGTGAGTCCTCCA , 5  
TCACCAAAGTTGTTTCTCTCGCTTCCTCCTTCCCTCTCCCCCTTCCCCCCTCTCTTTAGATGGAAGTGAT  
TGTTGGGGACTTTGGGATCGTCGTGGTACCCAGGGATGCAGCGGACACAGACCGGATCATGAATCACTCC  
GCCATACTCCGCAAGTACAAAGTGAGTCCTCCA , 5  
TCACCAAAGTTGTTTCTCTCGCTTCCTCCTTCCCTCTCCCCCTTCCCCCCTCTCTTTAGATGGAAGTGAT  
TGTTGGGGACTTTGGGATCGTCGTGGTACCCAGGGATGCAGCGGGCACAGACCGGATCATGAATCACTCC  
TCCATACTCCGCAAGTACAAAGTGAGTCCTCCA , 5  
TCACCAAAGTTGTTTCTCTCACTTCCTCCTTCCCTCTCCCCCTTCCCCCCTCTCTTTAGATGGAAGTGAT  
TGTTGGGGACTTTGGGATCGTCGTGGTACCCAGGGATGCAGCGGACACAGACCGGATCATGAATCACTCC  
TCCATACTCCGCAAGTACAAAGTGAGTCCTCCA , 4  
TCACCAAAGTTGTTTCTCTCGCTTCCTCCTTCCCTCTCCCCCTTCCCCCCTCTCTTTAGATGGAAGTGAT  
TGTTGGGGACTTTGGGATCGTCGTGGTACCCAGGGATGCAGCGGACACAGACCGGATCATGAATCACTCC  
TCCATACTCCGCAAGTACAAAGTGAGTCCTCCA , 4

GEIC-Plate01-B04 TOTAL:4076 OrderedDict([('WT\_sp1', 2041), ('R232Q', 0), ('Silent Block Mod', 1976), ('R232Q (Full ssODN)', 0), ('Silent Block Mod (Full ssODN)', 1842)]) [(0, 4064), (-1, 9), (1, 3)]  
TCACCAAAGTTGTTTCTCTCGCTTCCTCCTTCCCTCTCCCCCTTCCCCCCTCTCTTTAGATGGAAGTGAT  
TGTTGGGGACTTTGGGATCGTCGTGGTACCCAGGGATGCAGCGGACACAGACCGGATCATGAATCACTCC  
TCCATACTCCGCAAGTACAAAGTGAGTCCTCCA , 1885  
TCACCAAAGTTGTTTCTCTCGCTTCCTCCTTCCCTCTCCCCCTTCCCCCCTCTCTTTAGATGGAAGTGAT  
TGTTGGGGACTTTGGGATCGTCGTGGTACCCCGTGATGCAGCGGACACAGACCGGATCATGAATCACTCC  
TCCATACTCCGCAAGTACAAAGTGAGTCCTCCA , 1816  
TCACCAAAGTTGTTTCTCTCGCTTCCTCCTTCCCTCTCCCCCTTCCCCCCTCTCTTTAGATGGAAGTGAT  
TGTTGGGGACTGTGGGATCGTCGTGGTACCCAGGGATGCAGCGGACACAGACCGGATCATGAATCACTCC  
TCCATACTCCGCAAGTACAAAGTGAGTCCTCCA , 10  
TCACCAAAGTTGTTTCTCTCGCTTCCTCCTTCCCTCTCCCCCTTCCCCCCTCTCTTTAGATGGAAGTGAT  
TGTTGGGGACTTTGGGATCGTCGTGGTACCCAGGGATGCAGCGGACACGGACCGGATCATGAATCACTCC  
TCCATACTCCGCAAGTACAAAGTGAGTCCTCCA , 7  
TCACCAAAGTTGTTTCTCTCGCTTCCTCCTTCCCTCTCCCCCTTCCCCCCTCTCTTTAGATGGAAGTGAT  
TGTTGGGGACTGTGGGATCGTCGTGGTACCCCGTGATGCAGCGGACACAGACCGGATCATGAATCACTCC  
TCCATACTCCGCAAGTACAAAGTGAGTCCTCCA , 6  
TCACCAAAGTTGTTTCTCTCGCTTCCTCCTTCCCTCTCCCCCTTCCCCCCTCTCTTTAGATGGAAGTGAT  
TGTTGGGGACTTTGGGATCGTCGTGGTACCCCGTGATGCAGCGGACACAGACCGGATCATGAATCGCTCC  
TCCATACTCCGCAAGTACAAAGTGAGTCCTCCA , 6  
TCACCAAAGTTGTTTCTCTCGCTTCCTCCTTCCCTCTCCCCCTTCCCCCCTCTCTTTAGATGGAAGTGAT  
TGTTGGGGACGTTGGGATCGTCGTGGTACCCAGGGATGCAGCGGACACAGACCGGATCATGAATCACTCC  
TCCATACTCCGCAAGTACAAAGTGAGTCCTCCA , 5  
TCACCAAAGTTGTTTCTCTCGCTTCCTCCTTCCCTCTCCCCCTTCCCCCCTCTCTTTAGATGGAAGTGAT  
TGTTGGGGACTTTGGGATCGTCGTGGTACCCAGGGATGCAGCGGACACAGACCGGATCATGAATCACTCC  
TCCATGCTCCGCAAGTACAAAGTGAGTCCTCCA , 4  
TCACCAAAGTTGTTTCTCTCGCTTCCTCCTTCCCTCTCCCCCTTCCCCCCTCTCTTTAGATGGAAGTGAT  
TGTTGGGGACTTTGGGATCGTCGTGGTACCCAGGGATGCAGCGGACACAGACCGGATCATGAATCGCTCC  
TCCATACTCCGCAAGTACAAAGTGAGTCCTCCA , 4  
TCACCAAAGTTGTTTCTCTCGCTTCCTCCTTCCCTCTCCCCCTTCCCCCCTCTCTTTAGATGGAAGTGAT  
TGTTGGGGACTTTGGGATCGTCGTGGTCCCAGGGATGCAGCGGACACAGACCGGATCATGAATCACTCC

TCCATACTCCGCAAGTACAAAGTGAGTCCTCCA , 4  
TCACCAAAGTTGTTTCTCTCGCCTCCTCCTTCCCTCTCCCCCTTCCCCCCTCTCTTTAGATGGAAGTGAT  
TGTTGGGGACTTTGGGATCGTCGTGGTACCCAGGGATGCAGCGGACACAGACCCGGATCATGAATCACTCC  
TCCATACTCCGCAAGTACAAAGTGAGTCCTCCA , 3  
TCACCAAAGTTGTTTCTCTCGCTTCCCTCCTTCCCTCTCCCCCTTCCCCCCTCTCTTTAGATGGAAGTGAT  
TGTTGGGGACTTTGGGATTGTCGTGGTACCCCGTGATGCAGCGGACACAGACCCGGATCATGAATCACTCC  
TCCATACTCCGCAAGTACAAAGTGAGTCCTCCA , 3

GEIC-Plate01-B05 TOTAL:4184 OrderedDict([('WT\_sp1', 2039), ('R232Q', 2065), ('Silent Block Mod', 0), ('R232Q (Full ssODN)', 1890), ('Silent Block Mod (Full ssODN)', 0)]) [(0, 4173), (-1, 10), (1, 1)]  
TCACCAAAGTTGTTTCTCTCGCTTCCCTCCTTCCCTCTCCCCCTTCCCCCCTCTCTTTAGATGGAAGTGAT  
TGTTGGGGACTTTGGGATCGTCGTGGTACCCCAAGATGCAGCGGACACAGACCCGGATCATGAATCACTCC  
TCCATACTCCGCAAGTACAAAGTGAGTCCTCCA , 1864  
TCACCAAAGTTGTTTCTCTCGCTTCCCTCCTTCCCTCTCCCCCTTCCCCCCTCTCTTTAGATGGAAGTGAT  
TGTTGGGGACTTTGGGATCGTCGTGGTACCCAGGGATGCAGCGGACACAGACCCGGATCATGAATCACTCC  
TCCATACTCCGCAAGTACAAAGTGAGTCCTCCA , 1820  
TCACCAAAGTTGTTTCTCTCGCTTCCCTCCTTCCCTCTCCCCCTTCCCCCCTCTCTTTAGATGGAAGTGAT  
TGTTGGGGACTTTGGGATCGTCGTGGTACCCAGGGATGCAGCGGACACAGACCCGGATCATGAATCACTCC  
TCCATACTCCGCAAGTACAAAGTGAGTCCTCCA , 13  
TCACCAAAGTTGTTTCTCTCGCTTCCCTCCTTCCCTCTCCCCCTTCCCCCCTCTCTTTAGATGGAAGTGAT  
TGTTGGGGACTTTGGGATCGTCGTGGTACCCCAAGATGCAGCGGACACAGACCCGGATCATGAATCACTCC  
TCCATACTCCGCAAGTACAAAGTGAGTCCTCCA , 9  
TCACCAAAGTTGTTTCTCTCGCTTCCCTCCTTCCCTCTCCCCCTTCCCCCCTCTCTTTAGATGGAAGTGAT  
TGTTGGGGACTTTGGGATCGTCGTGGTACCCCAAGATGCAGCGGACACAGACCCGGATCATGAATCGCTCC  
TCCATACTCCGCAAGTACAAAGTGAGTCCTCCA , 9  
TCACCAAAGTTGTTTCTCTCGCTTCCCTCCTTCCCTCTCCCCCTTCCCCCCTCTCTTTAGATGGAAGTGAT  
TGTTGGGGACTTTGGGATCGTCGTGGTACCCAGGGATGCAGCGGACACAGACCCGGATCATGAATCGCTCC  
TCCATACTCCGCAAGTACAAAGTGAGTCCTCCA , 8  
TCACCAAAGTTGTTTCTCTCGCTTCCCTCCTTCCCTCTCCCCCTTCCCCCCTCTCTTTAGATGGAAGTGAT  
TGTTGGGGACTTTGGGATCGTCGTGGTACCCCAAGATGCAGCGGACACAGACCCGGATCATGAATCACTCC  
TCCATGCTCCGCAAGTACAAAGTGAGTCCTCCA , 5  
TCACCAAAGTTGTTTCTCTCGCTTCCCTCCTTCCCTCTCCCCCTTCCCCCCTCTCTTTAGATGGAAGTGAT  
TGTTGGGGACTTTGGGATCGTCGTGGTACCCAGGGATGCAGCGGACACAGACCCGGATCATGAATCACTCC  
TCCATGCTCCGCAAGTACAAAGTGAGTCCTCCA , 5  
TCACCAAAGTTGTTTCTCTCGCTTCCCTCCTTCCCTCTCCCCCTTCCCCCCTCTCTTTAGATGGAAGTGAT  
TGTTGGGGACTTTGGGATCGTCGTGGTACCCAGGGATGCAGCGGACACAGACCCGGATCATGAATCACTCC  
TCCATACTCCGCAAGTACCAAGTGAGTCCTCCA , 5  
TCACCAAAGTTGTTTCTCTCGCTTCCCTCCTTCCCTCTCCCCCTTCCCCCCTCTCTTTAGATGGAAGTGAT  
TGTTGGGGACTTTGGGATCGTCGTGGTACCCCAAGATGCAGCGGACACAGACCCGGATCATGAATCACTCC  
GCCATACTCCGCAAGTACAAAGTGAGTCCTCCA , 4  
TCACCAAAGTTGTTTCTCTCGCTTCCCTCCTTCCCTCTCCCCCTTCCCCCCTCTCTTTAGATGGAAGTGAT  
TGTTGGGGACTTTGGGATCGTCGTGGTACCCAGGGATGCAGCGGACACAGACCCGGATCATGAATCACTCC  
TCCATACGCCGCAAGTACAAAGTGAGTCCTCCA , 4  
TCACCAAAGTTGTTTCTCTCGCTTCCCTCCTTCCCTCTCCCCCTTCCCCCCTCTCTTTAGATGGAAGTGAT  
TGTTGGGGACTTTGGGATCGTCGTGGTACCCCAAGATGCAGCGGACACAGACCCGGATCATGAATCACTCC  
TCCATACTCCGCAAGTACAAAGTGAGTCCTCCA , 4

GEIC-Plate01-B06 TOTAL:3336 OrderedDict([('WT\_sp1', 1715), ('R232Q', 1548), ('Silent Block Mod', 0), ('R232Q (Full ssODN)', 1400), ('Silent Block Mod (Full ssODN)', 0)]) [(0, 3318), (-1, 17), (1, 1)]  
TCACCAAAGTTGTTTCTCTCGCTTCCTCCTTCCCTCTCCCCCTTCCCCCCTCTCTTTAGATGGAAGTGAT  
TGTTGGGGACTTTGGGATCGTCGTGGTACCCAGGGATGCAGCGGACACAGACCGGATCATGAATCACTCC  
TCCATACTCCGCAAGTACAAAGTGAGTCCTCCA , 1512  
TCACCAAAGTTGTTTCTCTCGCTTCCTCCTTCCCTCTCCCCCTTCCCCCCTCTCTTTAGATGGAAGTGAT  
TGTTGGGGACTTTGGGATCGTCGTGGTACCCCAAGATGCAGCGGACACAGACCGGATCATGAATCACTCC  
TCCATACTCCGCAAGTACAAAGTGAGTCCTCCA , 1384  
TCACCAAAGTTGTTTCTCTCGCTTCCTCCTTCCCTCTCCCCCTTCCCCCCTCTCTTTAGATGGAAGTGAT  
TGTTGGGGACTTTGGGATCGTCGTGGTACCCAGGGATGCAGCGGACACAGACCGGATCATGAATCACTCC  
TCCATACTCCGCAAGTACAAAGTGAGTCCTCCA , 21  
TCACCAAAGTTGTTTCTCTCGCTTCCTCCTTCCCTCTCCCCCTTCCCCCCTCTCTTTAGATGGAAGTGAT  
TGTTGGGGACTTTGGGATCGTCGTGGTACCCCAAGATGCAGCGGACACAGACCGGATCATGAATCGCTCC  
TCCATACTCCGCAAGTACAAAGTGAGTCCTCCA , 11  
TCACCAAAGTTGTTTCTCTCGCTTCCTCCTTCCCTCTCCCCCTTCCCCCCTCTCTTTAGATGGAAGTGAT  
TGTTGGGGACTTTGGGATCGTCGTGGTACCCAGGGATGCAGCGGACACAGACCGGATCATGAATCACTCC  
TCCATACTCCGCAAGTACAAAGTGAGTCCTCCA , 9  
TCACCAAAGTTGTTTCTCTCGCTTCCTCCTTCCCTCTCCCCCTTCCCCCCTCTCTTTAGATGGAAGTGAT  
TGTTGGGGACTGTGGGATCGTCGTGGTACCCAGGGATGCAGCGGACACAGACCGGATCATGAATCACTCC  
TCCATACTCCGCAAGTACAAAGTGAGTCCTCCA , 6  
TCACCAAAGTTGTTTCTCTCGCTTCCTCCTTCCCTCTCCCCCTTCCCCCCTCTCTTTAGATGGAAGTGAT  
TGTTGGGGACTTTGGGATCGTCGTGGTACCCAGGGATGCAGCGGACACAGACCGGATCATGAATCGCTCC  
TCCATACTCCGCAAGTACAAAGTGAGTCCTCCA , 4  
TCACCAAAGTTGTTTCTCTCGCTTCCTCCTTCCCTCTCCCCCTTCCCCCCTCTCTTTAGATGGAAGTGAT  
TGTTGGGGACTGTGGGATCGTCGTGGTACCCCAAGATGCAGCGGACACAGACCGGATCATGAATCACTCC  
TCCATACTCCGCAAGTACAAAGTGAGTCCTCCA , 4  
TCACCAAAGTTGTTTCTCTCGCTTCCTCCTTCCCTCTCCCCCTTCCCCCCTCTCTTTAGATGGAAGTGAT  
TGTTGGGGACTTTGGGATCGTCGTGGTACCCAGGGATGCAGCAGACACAGACCGGATCATGAATCACTCC  
TCCATACTCCGCAAGTACAAAGTGAGTCCTCCA , 4  
TCACCAAAGTTGTTTCTCTCGCTTCCTCCTTCCCTCTCCCCCTTCCCCCCTCTCTTTAGATGGAAGTGAT  
TGTTGGGGACTTTGGGATCGTCGTGGTACCCCAAGATGCAGCGGACACAGACCGGATCATGAATCACTCC  
GCCATACTCCGCAAGTACAAAGTGAGTCCTCCA , 4  
TCACCAAAGTTGTTTCTCTCGCTTCCTCCTTCCCTCTCCCCCTTCCCCCCTCTCTTTAGATGGAAGTGAT  
TGTTGGGGACTGTGGGATCGTCGTGGTACCCCAAGATGCAGCGGACACAGACCGGATCATGAATCACTCC  
TCCATACTCCGCAAGTACAAAGTGAGTCCTCCA , 3  
TCACCAAAGTTGTTTCTCTCGCTTCCTCCTTCCCTCTCCCCCTTCCCCCCTCTCTTTAGATGGAAGTGAT  
TGTTGGGGACTTTGGGATCGTCGTGGTACCCCAAGATGCAGCGGACACAGACCGGATCATGAATCACTCC  
TCCATACTCCGCAAGTACCAAGTGAGTCCTCCA , 3

GEIC-Plate01-B07 TOTAL:104 OrderedDict([('WT\_sp1', 103), ('R232Q', 0), ('Silent Block Mod', 0), ('R232Q (Full ssODN)', 0), ('Silent Block Mod (Full ssODN)', 0)]) [(0, 103), (-1, 1)]  
TCACCAAAGTTGTTTCTCTCGCTTCCTCCTTCCCTCTCCCCCTTCCCCCCTCTCTTTAGATGGAAGTGAT  
TGTTGGGGACTTTGGGATCGTCGTGGTACCCAGGGATGCAGCGGACACAGACCGGATCATGAATCACTCC  
TCCATACTCCGCAAGTACAAAGTGAGTCCTCCA , 96  
TCACCAAAGTTGTTTCTCTCGCTTCCTCCTTCCCTCTCCCCCTTCCCCCCTCTCTTTAGATGGAAGTGAT  
TGTTGGGGACTTTGGGATCGTCGTGGTACCCAGGGATGCAGCGGACACAGACCGGATCATGAAGCACTCC  
TCCATACTCCGCAAGTACAAAGTGAGTCCTCCA , 1

TCACCAAAGTTGTTTCTCTCGCTTCCTCCTTCCCTCTCCCCCTCCCCCCTCTTTAGATGGAAGTGATT  
GTTGGGGACTTTGGGATCGTCGTGGTACCCAGGGATGCAGCGGACACAGACCGGATCATGAATCACTCC  
CCATACTCCGCAAGTACAAAGTGAGTCCTCCA , 1  
TCACCAAAGTTGTTTCTCTCGCTTCCTCCTTCCCTCTCCCCCTCCCCCCTCTCTTTAGATGGAAGTGAT  
TGTTGGGGACTTTGGGATCGTCGTGGTACCCAGGGATGCAGCGGACACAGACCGGATCATGAATCACTCC  
TCCATACTCTGCAAGTACAAAGTGAGTCCTCCA , 1  
TCACCAAAGTTGTTTCTCTCGCTTCCTCCTTCCCTCTCCCCCTCCCCCCTCTCTTTAGATGGAAGTGGT  
TGTTGGGGACTTTGGGATAGTCGGGTACCCAGGGATGCAGCGGACACAGGCCGGATCATGAATCACTCC  
TCCATACTCCGCAAGTACAAAGTGAGTCCTCCA , 1  
TCACCAAAGTTGTTTCTCTCGCTTCCTCCTTCCCTCTCCCCCTCCCCCCTCTCTTTAGATGGAAGTGAT  
TGTTGGGGACTTTGGGATCGTCGTGGTACCCAGGGATGCAGCGGACACAGACCGGATCATGAATCACTCC  
TCCATACTCCACAAGTACAAAGTGAGTCCTCCA , 1  
TCACCAAAGTTGTTTCTCTCGCTTCCTCCTTCCCTCTCCCCCTCCCCCCTCTCTTTAGATGGAAGTGAT  
TGTTGGGGACTTTGGGATCGTCGTGGTACCCAGGGATGCAGCGGACACAGACCGGATCATGAATCACTCC  
TCCATACTCCGCAAGTACAAAGTGAGTCCTCCA , 1  
TCACCAAAGTTGTTTCTCTCGCTTCCTCCTTCCCTCTCCCCCTCCCCCCTCTCTTTAGATGGAAGTGAT  
TGTTGGGGACTTTGGGATCGTCGTGGTACCCAGGGATGCAGCGGACACAGACCGGATCATGAATCACTCC  
TCCATACTCCGCAAGTACAAAGTGAGTCCTCCA , 1

GEIC-Plate01-B08 TOTAL:4124 OrderedDict([('WT\_sp1', 4050), ('R232Q',  
0), ('Silent Block Mod', 0), ('R232Q (Full ssODN)', 0), ('Silent Block  
Mod (Full ssODN)', 0)]) [(0, 4110), (-1, 12), (1, 2)]  
TCACCAAAGTTGTTTCTCTCGCTTCCTCCTTCCCTCTCCCCCTCCCCCCTCTCTTTAGATGGAAGTGAT  
TGTTGGGGACTTTGGGATCGTCGTGGTACCCAGGGATGCAGCGGACACAGACCGGATCATGAATCACTCC  
TCCATACTCCGCAAGTACAAAGTGAGTCCTCCA , 3597  
TCACCAAAGTTGTTTCTCTCGCTTCCTCCTTCCCTCTCCCCCTCCCCCCTCTCTTTAGATGGAAGTGAT  
TGTTGGGGACTTTGGGATCGTCGTGGTACCCAGGGATGCAGCGGACACAGACCGGATCATGAATCACTCC  
TCCATACTCCGCAAGTACAAAGTGAGTCCTCCA , 18  
TCACCAAAGTTGTTTCTCTCGCTTCCTCCTTCCCTCTCCCCCTCCCCCCTCTCTTTAGATGGAAGTGAT  
TGTTGGGGACTTTGGGATCGTCGTGGTACCCAGGGATGCAGCGGACACAGACCGGATCATGAATCACTCC  
TCCATACTCCGCAAGTACAAAGTGAGTCCTCCA , 17  
TCACCAAAGTTGTTTCTCTCGCTTCCTCCTTCCCTCTCCCCCTCCCCCCTCTCTTTAGATGGAAGTGAT  
TGTTGGGGACTGTGGGATCGTCGTGGTACCCAGGGATGCAGCGGACACAGACCGGATCATGAATCACTCC  
TCCATACTCCGCAAGTACAAAGTGAGTCCTCCA , 15  
TCACCAAAGTTGTTTCTCTCGCTTCCTCCTTCCCTCTCCCCCTCCCCCCTCTCTTTAGATGGAAGTGAT  
TGTTGGGGACTTTGGGATCGTCGTGGTACCCAGGGATGCAGCGGACACAGACCGGATCATGAATCGCTCC  
TCCATACTCCGCAAGTACAAAGTGAGTCCTCCA , 12  
TCACCAAAGTTGTTTCTCTCGCTTCCTCCTTCCCTCTCCCCCTCCCCCCTCTCTTTAGATGGAAGTGAT  
TGTTGGGGACTTTGGGATCGTCGTGGTACCCAGGGATGCAGCGGACACAGACCGGATCATGAATCACTCC  
TCCATACTCCGCAAGTACAAAGTGAGTCCTCCA , 8  
TCACCAAAGTTGTTTCTCTCGCTTCCTCCTTCCCTCTCCCCCTCCCCCCTCTCTTTAGATGGAAGTGAT  
TGTTGGGGACTTTGGGATCGTCGTGGTACCCAGGGATGCAGCGGACACAGACCGGATCATGAATCACTCC  
GCCATACTCCGCAAGTACAAAGTGAGTCCTCCA , 8  
TCACCAAAGTTGTTTCTCTCGCTTCCTCCTTCCCTCTCCCCCTCCCCCCTCTCTTTAGATGGAAGTGAT  
TGTTGGGGACTTTGGGATCGTCGTGGTACCCAGGGATGCAGCGGACACAGACCGGATCATGAATCACTCC  
TCCATGCTCCGCAAGTACAAAGTGAGTCCTCCA , 7

TCACCAAAGTTGTTTCTCTCGCTTCCTCCTTCCCTCTCCCCCTTCCCCCCTCTCTTTAGATGGAAGTGAT  
TGTTGGGGACTTTGGGATCGTCGTGGTACCCAGGGATGCAGCGGACACAGACCGGATCATGAATCACTCC  
TCCATACTCCGCAAGTACAAAGTGAGTCCTCCA , 7  
TCACCAAAGTTGTTTCTCTCGCTTCCTCCTTCCCTCTCCCCCTTCCCCCCTCTCTTTAGATGGAAGTGAT  
TGTTGGGGACTATGGGATCGTCGTGGTACCCAGGGATGCAGCGGACACAGACCGGATCATGAATCACTCC  
TCCATACTCCGCAAGTACAAAGTGAGTCCTCCA , 6  
TCACCAAAGTTGTTTCTCTCGCTTCCTCCTTCCCTCTCCCCCTTCCCCCCTCTCTTTAGATGGGAGTGAT  
TGTTGGGGACTTTGGGATCGTCGTGGTACCCAGGGATGCAGCGGACACAGACCGGATCATGAATCACTCC  
TCCATACTCCGCAAGTACAAAGTGAGTCCTCCA , 6  
TCACCAAAGTTGTTTCTCTCGCTTCCTCCTTCCCTCTCCCCCTTCCCCCCTCTCTTTAGATGGAAGTGAT  
TGTTGGGGACTTTGGGATCGTCGTGGTACCCAGGGATGCAGCGGACACAGACCGGATCATGAATCACTCC  
TCCATACTCCGCAAGTACAAAGTGAGTCCTCCA , 5

GEIC-Plate01-C01 TOTAL:1965 OrderedDict([('WT\_sp1', 1931), ('R232Q',  
0), ('Silent Block Mod', 0), ('R232Q (Full ssODN)', 0), ('Silent Block  
Mod (Full ssODN)', 0)]) [(0, 1958), (-1, 7)]  
TCACCAAAGTTGTTTCTCTCGCTTCCTCCTTCCCTCTCCCCCTTCCCCCCTCTCTTTAGATGGAAGTGAT  
TGTTGGGGACTTTGGGATCGTCGTGGTACCCAGGGATGCAGCGGACACAGACCGGATCATGAATCACTCC  
TCCATACTCCGCAAGTACAAAGTGAGTCCTCCA , 1716  
TCACCAAAGTTGTTTCTCTCGCTTCCTCCTTCCCTCTCCCCCTTCCCCCCTCTCTTTAGATGGAAGTGAT  
TGTTGGGGACTTTGGGATCGTCGTGGTACCCAGGGATGCAGCGGACACAGACCGGATCATGAATCACTCC  
TCCATACTCCGCAAGTACAAAGTGAGTCCTCCA , 12  
TCACCAAAGTTGTTTCTCTCGCTTCCTCCTTCCCTCTCCCCCTTCCCCCCTCTCTTTAGATGGAAGTGAT  
TGTTGGGGACTTTGGGATCGTCGTGGTACCCAGGGATGCAGCGGACACAGACCGGATCATGAATCGCTCC  
TCCATACTCCGCAAGTACAAAGTGAGTCCTCCA , 4  
TCACCAAAGTTGTTTCTCTCGCTTCCTCCTTCCCTCTCCCCCTTCCCCCCTCTCTTTAGATGGAAGTGAT  
TGTTGGGGACGTTGGGATCGTCGTGGTACCCAGGGATGCAGCGGACACAGACCGGATCATGAATCACTCC  
TCCATACTCCGCAAGTACAAAGTGAGTCCTCCA , 4  
TCACCAAAGTTGTTTCTCTCGCTTCCTCCTTCCCTCTCCCCCTTCCCCCCTCTCTTTAGATGGAAGTGAT  
TGTTGGGGACTTTGGGATCGTCGTGGTACCCAGGGATGCAGCGGACACAGACCGGATCATGAATCACTCC  
GCCATACTCCGCAAGTACAAAGTGAGTCCTCCA , 4  
TCACCAAAGTTGTTTCTCTCGCTTCCTCCTTCCCTCTCCCCCTTCCCCCCTCTCTTTAGATGGAAGTGAT  
TGTTGGGGACTTTGGGATCGTCGTGGTACCCAGGGATGCAGCGGACACAGACCGGATCATGAATCACTCC  
TCCATACTCCGCAAGTACAAAGTGAGTCCTCCA , 3  
TCACCAAAGTTGTTTCTCTCGCTTCCTCCTTCCCTCTCCCCCTTCCCCCCTCTCTTTAGATGGAAGTGAT  
TGTTGGGGACTTTGGGATCGTCGTGGTACCCAGGGATGCAGCGGACACAGACCGGATCATGAATCACTCC  
TCCATGCTCCGCAAGTACAAAGTGAGTCCTCCA , 3  
TCACCAAAGTTGTTTCTCTCGCTTCCTCCTTCCCTCTCCCCCTTCCCCCCTCTCTTTAGATGGAAGTGAT  
TGTTGGGGACTTTGGGATCGTCGTGGTACCTAGGGATGCAGCGGACACAGACCGGATCATGAATCACTCC  
TCCATACTCCGCAAGTACAAAGTGAGTCCTCCA , 3  
TCACCAAAGTTGTTTCTCTCGCTTCCTCCTTCCCTCTCCCCCTTCCCCCCTCTCTTTAGATGGAAGTGAT  
TGTTGGGGACTTTGGGATCGTCGTGGTACCCAGGGATGCAGCGGACACAGACCGGATCATGAATCACTCC  
TCCATACTCCGCAAGTACAAAGTGAGTCCTCCA , 3  
TCACCAAAGTTGTTTCTCTCGCTTCCTCCTTCCCTCTCCCCCTTCCCCCCTCTCTTTAGATGGAAGTGAT  
TGTTGGGGACTTTGGGATCGTCGTGGTACCCAGGGATGCAGCGGACACAGACCGGATCATGAATCACTCC  
TCCATACTCCGCAAGTACAAAGTGAGTCCTCCA , 3

TCACCAAAGTTGTTTCTCTCGCTTCCTCCTTCCCTCTCCCCCTTCCCCCCTCTCTTTAGATGGAAGTGAT  
TGTTGGGGACTTTGGGATCGTCGTGGTACCCAGGGATGCAGCGGACACAGGCCGGATCATGAATCACTCC  
TCCATACTCCGCAAGTACAAAGTGAGTCCTCCA , 2

GEIC-Plate01-C02 TOTAL:3906 OrderedDict([('WT\_sp1', 1918), ('R232Q',  
0), ('Silent Block Mod', 1916), ('R232Q (Full ssODN)', 0), ('Silent  
Block Mod (Full ssODN)', 1774)]) [(0, 3886), (-1, 16), (1, 2),  
(-29, 1), (-2, 1)]

TCACCAAAGTTGTTTCTCTCGCTTCCTCCTTCCCTCTCCCCCTTCCCCCCTCTCTTTAGATGGAAGTGAT  
TGTTGGGGACTTTGGGATCGTCGTGGTACCCCGTGATGCAGCGGACACAGACCGGATCATGAATCACTCC  
TCCATACTCCGCAAGTACAAAGTGAGTCCTCCA , 1748

TCACCAAAGTTGTTTCTCTCGCTTCCTCCTTCCCTCTCCCCCTTCCCCCCTCTCTTTAGATGGAAGTGAT  
TGTTGGGGACTTTGGGATCGTCGTGGTACCCAGGGATGCAGCGGACACAGACCGGATCATGAATCACTCC  
TCCATACTCCGCAAGTACAAAGTGAGTCCTCCA , 1720

TCACCAAAGTTGTTTCTCTCGCTTCCTCCTTCCCTCTCCCCCTTCCCCCCTCTCTTTAGATGGAAGTGAT  
TGTTGGGGACTTTGGGATCGTCGTGGTACCCAGGGATGCAGCGGACACAGACCGGATCATGAATCACTCC  
TCCATACTCCGCAAGTACAAAGTGAGTCCTCCA , 11

TCACCAAAGTTGTTTCTCTCGCTTCCTCCTTCCCTCTCCCCCTTCCCCCCTCTCTTTAGATGGAAGTGAT  
TGTTGGGGACTGTGGGATCGTCGTGGTACCCCGTGATGCAGCGGACACAGACCGGATCATGAATCACTCC  
TCCATACTCCGCAAGTACAAAGTGAGTCCTCCA , 6

TCACCAAAGTTGTTTCTCTCGCTTCCTCCTTCCCTCTCCCCCTTCCCCCCTCTCTTTAGATGGAAGTGAT  
TGTTGGGGACTTTGGGATCGTCGTGGTACCCAGGGATGCAGCGGACACAGACCGGATCATGAATCACTCC  
TCCATACTCCGCAAGTACAAAGTGAGTCCTCCA , 6

TCACCAAAGTTGTTTCTCTCGCTTCCTCCTTCCCTCTCCCCCTTCCCCCCTCTCTTTAGATGGAAGTGAT  
TGTTGGGGACTTTGGGATCGTCGTGGTACCCAGGGATGCAGCGGACACAGGCCGGATCATGAATCACTCC  
TCCATACTCCGCAAGTACAAAGTGAGTCCTCCA , 5

TCACCAAAGTTGTTTCTCTCGCTTCCTCCTTCCCTCTCCCCCTTCCCCCCTCTCTTTAGATGGAAGTGAT  
TGTTGGGGACTTTGGGATCGTCGTGGTACCCGGGATGCAGCGGACACAGACCGGATCATGAATCACTCC  
TCCATACTCCGCAAGTACAAAGTGAGTCCTCCA , 5

TCACCAAAGTTGTTTCTCTCGCTTCCTCCTTCCCTCTCCCCCTTCCCCCCTCTCTTTAGATGGAAGTGAT  
TGTTGGGGACTGTGGGATCGTCGTGGTACCCAGGGATGCAGCGGACACAGACCGGATCATGAATCACTCC  
TCCATACTCCGCAAGTACAAAGTGAGTCCTCCA , 5

TCACCAAAGTTGTTTCTCTCGCTTCCTCCTTCCCTCTCCCCCTTCCCCCCTCTCTTTAGATGGAAGTGAT  
TGTTGGGGACTTTGGGATCGTCGTGGTACCCAGTGATGCAGCGGACACAGACCGGATCATGAATCACTCC  
TCCATACTCCGCAAGTACAAAGTGAGTCCTCCA , 4

TCACCAAAGTTGTTTCTCTCGCTTCCTCCTTCCCTCTCCCCCTTCCCCCCTCTCTTTAGATGGAAGTGAT  
TGTTGGGGACTTTGGGATCGTCGTGGTACCCAGGGATGCAGCGGACACAGACCGGATCATGAATCACTCC  
TCCATGCTCCGCAAGTACAAAGTGAGTCCTCCA , 4

TCACCAAAGTTGTTTCTCTCGCTTCCTCCTTCCCTCTCCCCCTTCCCCCCTCTCTTTAGATGGAAGTGAT  
TGTTGGGGACTTTGGGATCGTCGTGGTACCCAGGGATGCAGCGGACACAGACCGGATCATGAATCACTCC  
TCCATACGCCGCAAGTACAAAGTGAGTCCTCCA , 4

TCACCAAAGTTGTTTCTCTCGCTTCCTCCTTCCCTCTCCCCCTTCCCCCCTCTCTTTAGATGGAAGTGATT  
GTTGGGGACTTTGGGATCGTCGTGGTACCCCGTGATGCAGCGGACACAGACCGGATCATGAATCACTCCT  
CCATACTCCGCAAGTACAAAGTGAGTCCTCCA , 4

GEIC-Plate01-C03 TOTAL:2829 OrderedDict([('WT\_sp1', 2787), ('R232Q',  
0), ('Silent Block Mod', 0), ('R232Q (Full ssODN)', 0), ('Silent Block  
Mod (Full ssODN)', 0)]) [(0, 2810), (-1, 14), (-2, 3), (1, 2)]

TCACCAAAGTTGTTTCTCTCGCTTCCTCCTTCCCTCTCCCCCTTCCCCCCTCTCTTTAGATGGAAGTGAT  
TGTTGGGGACTTTGGGATCGTCGTGGTACCCAGGGATGCAGCGGACACAGACCGGATCATGAATCACTCC  
TCCATACTCCGCAAGTACAAAGTGAGTCCTCCA , 2503  
TCACCAAAGTTGTTTCTCTCGCTTCCTCCTTCCCTCTCCCCCTTCCCCCCTCTCTTTAGATGGAAGTGAT  
TGTTGGGGACTTTGGGATCGTCGTGGTACCCAGGGATGCAGCGGACACAGACCGGATCATGAATCACTCC  
TCCATACTCCGCAAGTACAAAGTGAGTCCTCCA , 13  
TCACCAAAGTTGTTTCTCTCGCTTCCTCCTTCCCTCTCCCCCTTCCCCCCTCTCTTTAGATGGAAGTGAT  
TGTTGGGGACTTTGGGATCGTCGTGGTACCCAGGGATGCAGCGGACACAGACCGGATCATGAATCGCTCC  
TCCATACTCCGCAAGTACAAAGTGAGTCCTCCA , 7  
TCACCAAAGTTGTTTCTCTCGCTTCCTCCTTCCCTCTCCCCCTTCCCCCCTCTCTTTAGATGGAAGTGAT  
TGTTGGGGACTTTGGGATCGTCGTGGTACCCAGGGATGCAGCGGACACAGACCGGATCATGAATCACTCC  
TCCATGCTCCGCAAGTACAAAGTGAGTCCTCCA , 6  
TCACCAAAGTTGTTTCTCTCGCTTCCTCCTTCCCTCTCCCCCTTCCCCCCTCTCTTTAGATGGAAGTGAT  
TGTTGGGGACTTTGGGATCGTCGTGGTACCCAGGGATGCAGCGGACACAGACCGGATCATGAATCACTCC  
TCCATACTCTGCAAGTACAAAGTGAGTCCTCCA , 6  
TCACCAAAGTTGTTTCTCTCGCTTCCTCCTTCCCTCTCCCCCTTCCCCCCTCTCTTTAGATGGAAGTGAT  
TGTTGGGGACTTTGGGATCGTCGTGGTACCCAGGGATGCAGCGGACACAGGCGGATCATGAATCACTCC  
TCCATACTCCGCAAGTACAAAGTGAGTCCTCCA , 5  
TCACCAAAGTTGTTTCTCTCGCTTCCTCCTTCCCTCTCCCCCTTCCCCCCTCTCTTTAGATGGAAGTGAT  
TGTTGGGGACTTTGGGATCGTCGTGGTACCCAGGGATGCAGCGGACACCGACCGGATCATGAATCACTCC  
TCCATACTCCGCAAGTACAAAGTGAGTCCTCCA , 5  
TCACCAAAGTTGTTTCTCTCGCTTCCTCCTTCCCTCTCCCCCTTCCCCCCTCTCTTTAGATGGAAGTGAT  
TGTTGGGGACTTTGGGATCGTCGTGGTACCCAGGGATGCAGCGGACACAGACCGGATCATGAATCACTCC  
TCCATACTCCGCAAGTACAAAGTGAGTCCTCCA , 5  
TCACCAAAGTTGTTTCTCTCGCTTCCTCCTTCCCTCTCCCCCTTCCCCCCTCTCTTTAGATGGAAGTGAT  
TGTTGGGGACTTTGGGATCGTCGTGGTACCCAGGGATGCAGCGGACACAGACCGGATCATGAATCACTCC  
TCCATACTCCGCAAGTACAAAGTGAGTCCTCCA , 5  
TCACCAAAGTTGTTTCTCTCGCTTCCTCCTTCCCTCTCCCCCTTCCCCCCTCTCTTTAGATGGAAGTGAT  
TGTTGGGGACTTTGGGATCGTCGTGGTACCCAGGGATGCAGCGGACACAGACCGGATCATGAATCACTCC  
TCCATACTCCGCAAGTACAAAGTGAGTCCTCCA , 4  
TCACCAAAGTTGTTTCTCTCGCTTCCTCCTTCCCTCTCCCCCTTCCCCCCTCTCTTTAGATGGAAGTGAT  
TGTTGGGGACTTTGGGATCGTCGTGGTACCCAGGGATGCAGCGGACACAGACCGGATCATGAATCACTCC  
TCCATACTCCGCAAGTACAAAGTGAGTCCTCCA , 4  
TCACCAAAGTTGTTTCTCTCGCTTCCTCCTTCCCTCTCCCCCTTCCCCCCTCTCTTTAGATGGAAGTGATT  
GTTGGGGACTTTGGGATCGTCGTGGTACCCAGGGATGCAGCGGACACAGACCGGATCATGAATCACTCCT  
CCATACTCCGCAAGTACAAAGTGAGTCCTCCA , 3

GEIC-Plate01-C04 TOTAL:2796 OrderedDict([('WT\_sp1', 2739), ('R232Q',  
0), ('Silent Block Mod', 0), ('R232Q (Full ssODN)', 0), ('Silent Block  
Mod (Full ssODN)', 0)]) [(0, 2781), (-1, 13), (1, 1), (-3, 1)]  
TCACCAAAGTTGTTTCTCTCGCTTCCTCCTTCCCTCTCCCCCTTCCCCCCTCTCTTTAGATGGAAGTGAT  
TGTTGGGGACTTTGGGATCGTCGTGGTACCCAGGGATGCAGCGGACACAGACCGGATCATGAATCACTCC  
TCCATACTCCGCAAGTACAAAGTGAGTCCTCCA , 2426  
TCACCAAAGTTGTTTCTCTCGCTTCCTCCTTCCCTCTCCCCCTTCCCCCCTCTCTTTAGATGGAAGTGAT  
TGTTGGGGACTTTGGGATCGTCGTGGTACCCAGGGATGCAGCGGACACAGACCGGATCATGAATCACTCC  
TCCATACTCCGCAAGTACAAAGTGAGTCCTCCA , 15  
TCACCAAAGTTGTTTCTCTCGCTTCCTCCTTCCCTCTCCCCCTTCCCCCCTCTCTTTAGATGGAAGTGAT  
TGTTGGGGACTTTGGGATCGTCGTGGTACCCAGGGATGCAGCGGACACAGACCGGATCATGAATCACTCC  
TCCATACTCCGCAAGTACAAAGTGAGTCCTCCA , 13

TCACCAAAGTTGTTTCTCTCGCTTCCTCCTTCCCTCTCCCCCTTCCCCCCTCTCTTTAGATGGAAGTGAT  
TGTTGGGGACTTTGGGATCGTCGTGGTACCCAGGGATGCAGCGGACACAGACCGGATCATGAATCGCTCC  
TCCATACTCCGCAAGTACAAAGTGAGTCCTCCA , 12  
TCACCAAAGTTGTTTCTCTCGCTTCCTCCTTCCCTCTCCCCCTTCCCCCCTCTCTTTAGATGGAAGTGAT  
TGTTGGGGACTTTGGGATCGTCGTGGTACCCAGGGATGCAGCGGACACAGACCGGATCATGAATCACTCC  
TCCATACTCCGCAAGTACAAAGTGAGTCCTCCA , 7  
TCACCAAAGTTGTTTCTCTCGCTTCCTCCTTCCCTCTCCCCCTTCCCCCCTCTCTTTAGATGGAAGTGATT  
GTTGGGGACTTTGGGATCGTCGTGGTACCCAGGGATGCAGCGGACACAGACCGGATCATGAATCACTCCT  
CCATACTCCGCAAGTACAAAGTGAGTCCTCCA , 5  
TCACCAAAGTTGTTTCTCTCGCTTCCTCCTTCCCTCTCCCCCTTCCCCCCTCTCTTTAGATGGAAGTGAT  
TGTTGGGGACTTTGGGATCGTCGTGGTACCCAGGGATGCAGCGGACACAGACCGGATCATGAATCACTCC  
TCCATACTCCGCAAGTACAAAGTGAGTCCTCCA , 5  
TCACCAAAGTTGTTTCTCTCGCTTCCTCCTTCCCTCTCCCCCTTCCCCCCTCTCTTTAGATGGAAGTGAT  
TGTTGGGGACTTTGGGATCGTCGTGGTACCCAGGGATGCAGCGGACACAGACCGGATCATGAATCACTCC  
TCCATACTCCGCAAGTACAAAGTGAGTCCTCCA , 5  
TCACCAAAGTTGTTTCTCTCGCTTCCTCCTTCCCTCTCCCCCTTCCCCCCTCTCTTTAGATGGAAGTGAT  
TGTTGGGGACTTTGGGATCGTCGTGGTACCCAGGGATGCAGCGGACACAGACCGGATCATGAATCACTCC  
TCCATACTCCGCAAGTACAAAGTGAGTCCTCCA , 4  
TCACCAAAGTTGTTTCTCTCGCTTCCTCCTTCCCTCTCCCCCTTCCCCCCTCTCTTTAGATGGAAGTGAT  
TGTTGGGGACTTTGGGATCGTCGTGGTACCCAGGGATGCAGCGGACACAGACCGATCATGAATCACTCC  
TCCATACTCCGCAAGTACAAAGTGAGTCCTCCA , 4  
TCACCAAAGTTGTTTCTCTCGCTTCCTCCTTCCCTCTCCCCCTTCCCCCCTCTCTTTAGATGGAAGTGAT  
TGTTGGGGACTTTGGGATCGTCGTAGTACCCAGGGATGCAGCGGACACAGACCGGATCATGAATCACTCC  
TCCATACTCCGCAAGTACAAAGTGAGTCCTCCA , 3  
TCACCAAAGTTGTTTCTCTCACTTCCTCCTTCCCTCTCCCCCTTCCCCCCTCTCTTTAGATGGAAGTGAT  
TGTTGGGGACTTTGGGATCGTCGTGGTACCCAGGGATGCAGCGGACACAGACCGGATCATGAATCACTCC  
TCCATACTCCGCAAGTACAAAGTGAGTCCTCCA , 3

GEIC-Plate01-C05 TOTAL:3827 OrderedDict([('WT\_sp1', 1897), ('R232Q', 1858), ('Silent Block Mod', 0), ('R232Q (Full ssODN)', 1696), ('Silent Block Mod (Full ssODN)', 0)]) [(0, 3812), (-1, 15)]  
TCACCAAAGTTGTTTCTCTCGCTTCCTCCTTCCCTCTCCCCCTTCCCCCCTCTCTTTAGATGGAAGTGAT  
TGTTGGGGACTTTGGGATCGTCGTGGTACCCCAAGATGCAGCGGACACAGACCGGATCATGAATCACTCC  
TCCATACTCCGCAAGTACAAAGTGAGTCCTCCA , 1678  
TCACCAAAGTTGTTTCTCTCGCTTCCTCCTTCCCTCTCCCCCTTCCCCCCTCTCTTTAGATGGAAGTGAT  
TGTTGGGGACTTTGGGATCGTCGTGGTACCCAGGGATGCAGCGGACACAGACCGGATCATGAATCACTCC  
TCCATACTCCGCAAGTACAAAGTGAGTCCTCCA , 1659  
TCACCAAAGTTGTTTCTCTCGCTTCCTCCTTCCCTCTCCCCCTTCCCCCCTCTCTTTAGATGGAAGTGAT  
TGTTGGGGACTTTGGGATCGTCGTGGTACCCAGGGATGCAGCGGACACAGACCGGATCATGAATCGCTCC  
TCCATACTCCGCAAGTACAAAGTGAGTCCTCCA , 10  
TCACCAAAGTTGTTTCTCTCGCTTCCTCCTTCCCTCTCCCCCTTCCCCCCTCTCTTTAGATGGAAGTGAT  
TGTTGGGGACTTTGGGATCGTCGTGGTACCCAGGGATGCAGCGGACACGGACCGGATCATGAATCACTCC  
TCCATACTCCGCAAGTACAAAGTGAGTCCTCCA , 8  
TCACCAAAGTTGTTTCTCTCGCTTCCTCCTTCCCTCTCCCCCTTCCCCCCTCTCTTTAGATGGAAGTGAT  
TGTTGGGGACTTTGGGATCGTCGTGGTACCCAGGGATGCAGCGGACACAGACCGGATCATGAATCACTCC  
TCCATACTCCGCAAGTACAAAGTGAGTCCTCCA , 7  
TCACCAAAGTTGTTTCTCTCGCTTCCTCCTTCCCTCTCCCCCTTCCCCCCTCTCTTTAGATGGAAGTGAT  
TGTTGGGGACTTTGGGATCGTCGTGGTACCCCAAGATGCAGCGGACACAGACCGGATCATGAATCGCTCC  
TCCATACTCCGCAAGTACAAAGTGAGTCCTCCA , 6

TCACCAAAGTTGTTTCTCTCGCTTCCTCCTTCCCTCTCCCCCTTCCCCCTCTCTTTAGATGGAAGTGATT  
GTTGGGGACTTTGGGATCGTCGTGGTACCCAGGGATGCAGCGGACACAGACCGGATCATGAATCACTCCT  
CCATACTCCGCAAGTACAAAGTGAGTCCTCCA , 5  
TCACCAAAGTTGTTTCTCTCGCTTCCTCCTTCCCTCTCCCCCTTCCCCCTCTCTTTAGATGGAAGTGAT  
TGTTGGGGACTTTGGGATCGTCGTGGTACCCCAAGATGCAGCGGACACAGACCGGATCATGAATCACTCC  
TCCATGCTCCGCAAGTACAAAGTGAGTCCTCCA , 5  
TCACCAAAGTTGTTTCTCTCGCTTCCTCCTTCCCTCTCCCCCTTCCCCCTCTCTTTAGATGGAAGTGAT  
TGTTGGGGACTTTGGGATCGTCGTGGTACCCAAAGATGCAGCGGACACAGACCGGATCATGAATCACTCC  
TCCATACTCCGCAAGTACAAAGTGAGTCCTCCA , 5  
TCACCAAAGTTGTTTCTCTCGCTTCCTCCTTCCCTCTCCCCCTTCCCCCTCTCTTTAGATGGAAGTGAT  
TGTTGGGGACTGTGGGATCGTCGTGGTACCCCAAGATGCAGCGGACACAGACCGGATCATGAATCACTCC  
TCCATACTCCGCAAGTACAAAGTGAGTCCTCCA , 5  
TCACCAAAGTTGTTTCTCTCGCTTCCTCCTTCCCTCTCCCCCTTCCCCCTCTCTTTAGATGGAAGTGAT  
TGTTGGGGACTTTGGGATCGTCGTGGTACCCCAAGATGCAGCGGACACAGACCGGATCATGAATCACTCC  
TCCATACTCCGCAAGTACAAAGTGAGTCCTCCA , 4  
TCACCAAAGTTGTTTCTCTCGCTTCCTCCTTCCCTCTCCCCCTTCCCCCTCTCTTTAGATGGAAGTGAT  
TGTTGGGGACTTTGGGATCGTCGTGGTACCTCAAGATGCAGCGGACACAGACCGGATCATGAATCACTCC  
TCCATACTCCGCAAGTACAAAGTGAGTCCTCCA , 4

GEIC-Plate01-C06 TOTAL:3705 OrderedDict([('WT\_sp1', 1866), ('R232Q',  
0), ('Silent Block Mod', 1757), ('R232Q (Full ssODN)', 0), ('Silent  
Block Mod (Full ssODN)', 1580)]) [(0, 3683), (-1, 20), (1, 1),  
(-2, 1)]

TCACCAAAGTTGTTTCTCTCGCTTCCTCCTTCCCTCTCCCCCTTCCCCCTCTCTTTAGATGGAAGTGAT  
TGTTGGGGACTTTGGGATCGTCGTGGTACCCAGGGATGCAGCGGACACAGACCGGATCATGAATCACTCC  
TCCATACTCCGCAAGTACAAAGTGAGTCCTCCA , 1647  
TCACCAAAGTTGTTTCTCTCGCTTCCTCCTTCCCTCTCCCCCTTCCCCCTCTCTTTAGATGGAAGTGAT  
TGTTGGGGACTTTGGGATCGTCGTGGTACCCGTGATGCAGCGGACACAGACCGGATCATGAATCACTCC  
TCCATACTCCGCAAGTACAAAGTGAGTCCTCCA , 1564  
TCACCAAAGTTGTTTCTCTCGCTTCCTCCTTCCCTCTCCCCCTTCCCCCTCTCTTTAGATGGAAGTGAT  
TGTTGGGGACTTTGGGATCGTCGTGGTACCCAGGGATGCAGCGGACACAGACCGGATCATGAATCACTCC  
TCCATACTCCGCAAGTACAAAGTGAGTCCTCCA , 14  
TCACCAAAGTTGTTTCTCTCGCTTCCTCCTTCCCTCTCCCCCTTCCCCCTCTCTTTAGATGGAAGTGAT  
TGTTGGGGACTGTGGGATCGTCGTGGTACCCGTGATGCAGCGGACACAGACCGGATCATGAATCACTCC  
TCCATACTCCGCAAGTACAAAGTGAGTCCTCCA , 10  
TCACCAAAGTTGTTTCTCTCGCTTCCTCCTTCCCTCTCCCCCTTCCCCCTCTCTTTAGATGGAAGTGAT  
TGTTGGGGACTGTGGGATCGTCGTGGTACCCAGGGATGCAGCGGACACAGACCGGATCATGAATCACTCC  
TCCATACTCCGCAAGTACAAAGTGAGTCCTCCA , 7  
TCACCAAAGTTGTTTCTCTCGCTTCCTCCTTCCCTCTCCCCCTTCCCCCTCTCTTTAGATGGAAGTGAT  
TGTTGGGGACTTTGGGATCGTCGTGGTACCCGTGATGCAGCGGACACAGACCGGATCATGAATCACTCC  
TCCATGCTCCGCAAGTACAAAGTGAGTCCTCCA , 7  
TCACCAAAGTTGTTTCTCTCGCTTCCTCCTTCCCTCTCCCCCTTCCCCCTCTCTTTAGATGGAAGTGAT  
TGTTGGGGACTTTGGGATCGTCGTGGTACCCAGGGATGCAGCGGACACAGACCGGATCATGAATCACTCC  
TCCATACTCCGCAAGTACAAAGTGAGTCCTCCA , 6  
TCACCAAAGTTGTTTCTCTCGCTTCCTCCTTCCCTCTCCCCCTTCCCCCTCTCTTTAGATGGAAGTGAT  
TGTTGGGGACGTTGGGATCGTCGTGGTACCCGTGATGCAGCGGACACAGACCGGATCATGAATCACTCC  
TCCATACTCCGCAAGTACAAAGTGAGTCCTCCA , 6  
TCACCAAAGTTGTTTCTCTCGCTTCCTCCTTCCCTCTCCCCCTTCCCCCTCTCTTTAGATGGAAGTGAT  
TGTTGGGGACTTTGGGATCGTCGTGGTACCCGTGATGCAGCGGACACAGACCGGATCATGAATCACTCC

TCCATACTCCACAAGTACAAAGTGAGTCCTCCA , 6  
TCACCAAAGTTGTTTCTCTCGCTTCCTCCTTCCCTCTCCCCCTTCCCCCCTCTCTTTAGATGGAAGTGAT  
TGTTGGGGACTTTGGGATCGTCGTGGTACCCCGTGATGCAGCGGACACAGACCGGATCATGAATCGCTCC  
TCCATACTCCGCAAGTACAAAGTGAGTCCTCCA , 5  
TCACCAAAGTTGTTTCTCTCGCTTCCTCCTTCCCTCTCCCCCTTCCCCCCTCTCTTTAGATGGAAGTGAT  
TGTTGGGGACTTTGGGATCGTCGTGGTACCCAGGGATGCAGCGGACACAGACCGGATCATGAATCGCTCC  
TCCATACTCCGCAAGTACAAAGTGAGTCCTCCA , 5  
TCACCAAAGTTGTTTCTCTCGCTTCCTCCTTCCCTCTCCCCCTTCCCCCCTCTCTTTAGATGGAAGTGAG  
TGTTGGGGACTTTGGGATCGTCGTGGTACCCCGTGATGCAGCGGACACAGACCGGATCATGAATCACTCC  
TCCATACTCCGCAAGTACAAAGTGAGTCCTCCA , 5

GEIC-Plate01-C07 TOTAL:2384 OrderedDict([('WT\_sp1', 2335), ('R232Q', 0), ('Silent Block Mod', 0), ('R232Q (Full ssODN)', 0), ('Silent Block Mod (Full ssODN)', 0)]) [(0, 2370), (-1, 13), (-2, 1)]  
TCACCAAAGTTGTTTCTCTCGCTTCCTCCTTCCCTCTCCCCCTTCCCCCCTCTCTTTAGATGGAAGTGAT  
TGTTGGGGACTTTGGGATCGTCGTGGTACCCAGGGATGCAGCGGACACAGACCGGATCATGAATCACTCC  
TCCATACTCCGCAAGTACAAAGTGAGTCCTCCA , 2023  
TCACCAAAGTTGTTTCTCTCGCTTCCTCCTTCCCTCTCCCCCTTCCCCCCTCTCTTTAGATGGAAGTGAT  
TGTTGGGGACTTTGGGATCGTCGTGGTACCCAGGGATGCAGCGGACACAGACCGGATCATGAATCGCTCC  
TCCATACTCCGCAAGTACAAAGTGAGTCCTCCA , 12  
TCACCAAAGTTGTTTCTCTCGCTTCCTCCTTCCCTCTCCCCCTTCCCCCCTCTCTTTAGATGGAAGTGAT  
TGTTGGGGACTTTGGGATCGTCGTGGTACCCAGGGATGCAGCGGACACGGACCGGATCATGAATCACTCC  
TCCATACTCCGCAAGTACAAAGTGAGTCCTCCA , 12  
TCACCAAAGTTGTTTCTCTCGCTTCCTCCTTCCCTCTCCCCCTTCCCCCCTCTCTTTAGATGGAAGTGAT  
TGTTGGGGACTTTGGGATCGTCGTGGTACCCAGGGATGCAGCGGACACAGACCGGATCATGAATCACTCC  
TCCATACTCCGCAAGTACAAAGTGAGTCCTCCA , 11  
TCACCAAAGTTGTTTCTCTCGCTTCCTCCTTCCCTCTCCCCCTTCCCCCCTCTCTTTAGATGGAAGTGAT  
TGTTGGGGACTGTGGGATCGTCGTGGTACCCAGGGATGCAGCGGACACAGACCGGATCATGAATCACTCC  
TCCATACTCCGCAAGTACAAAGTGAGTCCTCCA , 11  
TCACCAAAGTTGTTTCTCTCGCTTCCTCCTTCCCTCTCCCCCTTCCCCCCTCTCTTTAGATGGAAGTGAT  
TGTTGGGGACTTTGGGATCGTCGTGGTACCCAGGGATGCAGCGGACACCGACCGGATCATGAATCACTCC  
TCCATACTCCGCAAGTACAAAGTGAGTCCTCCA , 7  
TCACCAAAGTTGTTTCTCTCGCTTCCTCCTTCCCTCTCCCCCTTCCCCCCTCTCTTTAGATGGAAGTGAT  
TGTTGGGGACTTTGGGATCGTCGTGGTACCCAGGGATGCAGCGGACACAGGCCGGATCATGAATCACTCC  
TCCATACTCCGCAAGTACAAAGTGAGTCCTCCA , 6  
TCACCAAAGTTGTTTCTCTCGCTTCCTCCTTCCCTCTCCCCCTTCCCCCCTCTCTTTAGATGGAAGTGAT  
TGTTGGGGACTTTGAGATCGTCGTGGTACCCAGGGATGCAGCGGACACAGACCGGATCATGAATCACTCC  
TCCATACTCCGCAAGTACAAAGTGAGTCCTCCA , 5  
TCACCAAAGTTGTTTCTCTCGCTTCCTCCTTCCCTCTCCCCCTTCCCCCCTCTCTTTAGATGGAAGTGAT  
TGTTGGGGACTTTGGGGTCGTGGTACCCAGGGATGCAGCGGACACAGACCGGATCATGAATCACTCC  
TCCATACTCCGCAAGTACAAAGTGAGTCCTCCA , 4  
TCACCAAAGTTGTTTCTCTCGCTTCCTCCTTCCCTCTCCCCCTTCCCCCCTCTCTTTAGATGGAAGTGAT  
TGTTGGGGACTTTGGGATCGTCGTGGTACCCAGGGATGCAGCGGACACAGACCGGATCATGAATCACTCC  
TCCATACTCCGCAAGTACAAAGTGAGTCCTCCA , 4  
TCACCAAAGTTGTTTCTCTCGCTTCCTCCTTCCCTCTCCCCCTTCCCCCCTCTCTTTAGATGGAAGTGAT  
TGTTGGGGACTTTGGGATCGTCGTGGTACCCAGGGATGCAGCGGACACAGACCGGATCATGAATCACTCC

TCCATACTCCGCAAGTACAAATTGAGTCCTCCA , 4

GEIC-Plate01-C08 TOTAL:3172 OrderedDict([('WT\_sp1', 3102), ('R232Q', 0), ('Silent Block Mod', 0), ('R232Q (Full ssODN)', 0), ('Silent Block Mod (Full ssODN)', 0)]) [(0, 3162), (-1, 9), (-3, 1)]

TCACCAAAGTTGTTTCTCTCGCTTCCTCCTTCCCTCTCCCCCTTCCCCCTCTCTTTAGATGGAAGTGAT  
TGTTGGGGACTTTGGGATCGTCGTGGTACCCAGGGATGCAGCGGACACAGACCGGATCATGAATCACTCC  
TCCATACTCCGCAAGTACAAAGTGAGTCCTCCA , 2739

TCACCAAAGTTGTTTCTCTCGCTTCCTCCTTCCCTCTCCCCCTTCCCCCTCTCTTTAGATGGAAGTGAT  
TGTTGGGGACTTTGGGATCGTCGTGGTACCCAGGGATGCAGCGGACACAGACCGGATCATGAATCACTCC  
TCCATACTCCGCAAGTACAAAGTGAGTCCTCCA , 19

TCACCAAAGTTGTTTCTCTCGCTTCCTCCTTCCCTCTCCCCCTTCCCCCTCTCTTTAGATGGAAGTGAT  
TGTTGGGGACTGTGGGATCGTCGTGGTACCCAGGGATGCAGCGGACACAGACCGGATCATGAATCACTCC  
TCCATACTCCGCAAGTACAAAGTGAGTCCTCCA , 13

TCACCAAAGTTGTTTCTCTCGCTTCCTCCTTCCCTCTCCCCCTTCCCCCTCTCTTTAGATGGAAGTGAT  
TGTTGGGGACTTTGGGATCGTCGTGGTACCCAGGGATGCAGCGGACACAGACCGGATCATGAATCACTCC  
TCCATACTCCGCAAGTACAAAGTGAGTCCTCCA , 11

TCACCAAAGTTGTTTCTCTCGCTTCCTCCTTCCCTCTCCCCCTTCCCCCTCTCTTTAGATGGAAGTGAT  
TGTTGGGGACTTTGGGATCGTCGTGGTACCCAGGGATGCAGCGGACACAGACCGGATCATGAATCACTCC  
GCCATACTCCGCAAGTACAAAGTGAGTCCTCCA , 11

TCACCAAAGTTGTTTCTCTCGCTTCCTCCTTCCCTCTCCCCCTTCCCCCTCTCTTTAGATGGAAGTGAT  
TGTTGGGGACTTTGGGATCGTCGTGGTACCCAGGGATGCAGCGGACACAGACCGGATCATGAATCGCTCC  
TCCATACTCCGCAAGTACAAAGTGAGTCCTCCA , 10

TCACCAAAGTTGTTTCTCTCGCTTCCTCCTTCCCTCTCCCCCTTCCCCCTCTCTTTAGATGGAAGTGAT  
TGTTGGGGACTTTGGGATCGTCGTGGTACCCAGGGATGCAGCGGACACAGACCGGATCATGAATCACTCC  
TCCATACTCCGCAAGTACAAAGTGAGTCCTCCA , 9

TCACCAAAGTTGTTTCTCTCGCTTCCTCCTTCCCTCTCCCCCTTCCCCCTCTCTTTAGATGGAAGTGAT  
TGTTGGGGACTTTGGGATCGTCGTGGTACCCAGGGATGCAGCGGACACAGACCGGATCATGAATCACTCC  
TCCATACTCCGCAAGTACAAAGTGAGTCCTCCA , 7

TCACCAAAGTTGTTTCTCTCGCTTCCTCCTTCCCTCTCCCCCTTCCCCCTCTCTTTAGATGGAAGTGAT  
TGTTGGGGACTTTGGGATCGTCGTGGTACCCAGGGATGCAGCGGACACAGACCGGATCATGAATCACTCC  
TCCATACTCCGCAAGTACAAAGTGAGTCCTCCA , 6

TCACCAAAGTTGTTTCTCTCGCTTCCTCCTTCCCTCTCCCCCTTCCCCCTCTCTTTAGATGGAAGTGAG  
TGTTGGGGACTTTGGGATCGTCGTGGTACCCAGGGATGCAGCGGACACAGACCGGATCATGAATCACTCC  
TCCATACTCCGCAAGTACAAAGTGAGTCCTCCA , 5

TCACCAAAGTTGTTTCTCTCGCTTCCTCCTTCCCTCTCCCCCTTCCCCCTCTCTTTAGATGGAAGTGAT  
TGTTGGGGACTTTGGGATCGTCGTGGTACCCAGGGATGCAGCGGACACAGGCGGATCATGAATCACTCC  
TCCATACTCCGCAAGTACAAAGTGAGTCCTCCA , 4

TCACCAAAGTTGTTTCTCTCGCTTCCTCCTTCCCTCTCCCCCTTCCCCCTCTCTTTAGATGGAAGTGAT  
TGTTGGGGACTTTGGGATCGTCGTGGTACCCAGGGATGCAGCGGACACAGACCGGATCATGAATCACTCC  
TCCATGCTCCGCAAGTACAAAGTGAGTCCTCCA , 4

GEIC-Plate01-D01 TOTAL:3634 OrderedDict([('WT\_sp1', 1772), ('R232Q', 0), ('Silent Block Mod', 1769), ('R232Q (Full ssODN)', 0), ('Silent Block Mod (Full ssODN)', 1560)]) [(0, 3612), (-1, 22)]

TCACCAAAGTTGTTTCTCTCGCTTCCTCCTTCCCTCTCCCCCTTCCCCCTCTCTTTAGATGGAAGTGAT  
TGTTGGGGACTTTGGGATCGTCGTGGTACCCCGTGATGCAGCGGACACAGACCGGATCATGAATCACTCC  
TCCATACTCCGCAAGTACAAAGTGAGTCCTCCA , 1537

TCACCAAAGTTGTTTCTCTCGCTTCCTCCTTCCCTCTCCCCCTTCCCCCCTCTCTTTAGATGGAAGTGAT  
TGTTGGGGACTTTGGGATCGTCGTGGTACCCAGGGATGCAGCGGACACAGACCGGATCATGAATCACTCC  
TCCATACTCCGCAAGTACAAAGTGAGTCCTCCA , 1509  
TCACCAAAGTTGTTTCTCTCGCTTCCTCCTTCCCTCTCCCCCTTCCCCCCTCTCTTTAGATGGAAGTGAT  
TGTTGGGGACTTTGGGATCGTCGTGGTACCCAGGGATGCAGCGGACACAGACCGGATCATGAATCACTCC  
TCCATACTCCGCAAGTACAAAGTGAGTCCTCCA , 16  
TCACCAAAGTTGTTTCTCTCGCTTCCTCCTTCCCTCTCCCCCTTCCCCCCTCTCTTTAGATGGAAGTGAT  
TGTTGGGGACTGTGGGATCGTCGTGGTACCCCGTGATGCAGCGGACACAGACCGGATCATGAATCACTCC  
TCCATACTCCGCAAGTACAAAGTGAGTCCTCCA , 13  
TCACCAAAGTTGTTTCTCTCGCTTCCTCCTTCCCTCTCCCCCTTCCCCCCTCTCTTTAGATGGAAGTGAT  
TGTTGGGGACTTTGGGATCGTCGTGGTACCCAGGGATGCAGCGGACACAGACCGGATCATGAATCGCTCC  
TCCATACTCCGCAAGTACAAAGTGAGTCCTCCA , 11  
TCACCAAAGTTGTTTCTCTCGCTTCCTCCTTCCCTCTCCCCCTTCCCCCCTCTCTTTAGATGGAAGTGAT  
TGTTGGGGACTTTGGGATCGTCGTGGTACCCAGGGATGCAGCGGACACAGACCGGATCATGAATCACTCC  
TCCATACTCCGCAAGTACAAAGTGAGTCCTCCA , 9  
TCACCAAAGTTGTTTCTCTCGCTTCCTCCTTCCCTCTCCCCCTTCCCCCCTCTCTTTAGATGGAAGTGAT  
TGTTGGGGACTTTGGGATCGTCGTGGTACCCAGGGATGCAGCGGACACAGACCGGATCATGAATCACTCC  
TCCATACTCCGCAAGTACAAAGTGAGTCCTCCA , 8  
TCACCAAAGTTGTTTCTCTCGCTTCCTCCTTCCCTCTCCCCCTTCCCCCCTCTCTTTAGATGGAAGTGAT  
TGTTGGGGACTGTGGGATCGTCGTGGTACCCAGGGATGCAGCGGACACAGACCGGATCATGAATCACTCC  
TCCATACTCCGCAAGTACAAAGTGAGTCCTCCA , 8  
TCACCAAAGTTGTTTCTCTCGCTTCCTCCTTCCCTCTCCCCCTTCCCCCCTCTCTTTAGATGGAAGTGATT  
GTTGGGGACTTTGGGATCGTCGTGGTACCCAGGGATGCAGCGGACACAGACCGGATCATGAATCACTCCT  
CCATACTCCGCAAGTACAAAGTGAGTCCTCCA , 8  
TCACCAAAGTTGTTTCTCTCGCTTCCTCCTTCCCTCTCCCCCTTCCCCCCTCTCTTTAGATGGAAGTGAT  
TGTTGGGGACTTTGGGATCGTCGTGGTACCCAGGGATGCAGCGGACACAGACCGGATCATGAATCACTCC  
GCCATACTCCGCAAGTACAAAGTGAGTCCTCCA , 7  
TCACCAAAGTTGTTTCTCTCGCTTCCTCCTTCCCTCTCCCCCTTCCCCCCTCTCTTTAGATGGAAGTGAT  
TGTTGGGGACTTTGGGATCGTCGTGGTACCCAGGGATGCAGCGGACACAGACCGGATCATGAATCACTCC  
TCCATACTCCGCAAGTACAAAGTGAGTCCTCCA , 6  
TCACCAAAGTTGTTTCTCTCGCTTCCTCCTTCCCTCTCCCCCTTCCCCCCTCTCTTTAGATGGAAGTGAT  
TGTTGGGGACTTTGGGATCGTCGTGGTACCCCGTGATGCAGCGGACACAGACCGGATCATGAATCGCTCC  
TCCATACTCCGCAAGTACAAAGTGAGTCCTCCA , 5

GEIC-Plate01-D02 TOTAL:2344 OrderedDict([('WT\_sp1', 1096), ('R232Q',  
0), ('Silent Block Mod', 1201), ('R232Q (Full ssODN)', 0), ('Silent  
Block Mod (Full ssODN)', 1076)]) [(0, 2333), (-1, 11)]  
TCACCAAAGTTGTTTCTCTCGCTTCCTCCTTCCCTCTCCCCCTTCCCCCCTCTCTTTAGATGGAAGTGAT  
TGTTGGGGACTTTGGGATCGTCGTGGTACCCCGTGATGCAGCGGACACAGACCGGATCATGAATCACTCC  
TCCATACTCCGCAAGTACAAAGTGAGTCCTCCA , 1062  
TCACCAAAGTTGTTTCTCTCGCTTCCTCCTTCCCTCTCCCCCTTCCCCCCTCTCTTTAGATGGAAGTGAT  
TGTTGGGGACTTTGGGATCGTCGTGGTACCCAGGGATGCAGCGGACACAGACCGGATCATGAATCACTCC  
TCCATACTCCGCAAGTACAAAGTGAGTCCTCCA , 979  
TCACCAAAGTTGTTTCTCTCGCTTCCTCCTTCCCTCTCCCCCTTCCCCCCTCTCTTTAGATGGAAGTGAT  
TGTTGGGGACTTTGGGATCGTCGTGGTACCCAGGGATGCAGCGGACACAGACCGGATCATGAATCACTCC  
TCCATACTCCGCAAGTACAAAGTGAGTCCTCCA , 9  
TCACCAAAGTTGTTTCTCTCGCTTCCTCCTTCCCTCTCCCCCTTCCCCCCTCTCTTTAGATGGAAGTGAT  
TGTTGGGGACTTTGGGATCGTCGTGGTACCCCGTGATGCAGCGGACACAGACCGATCATGAATCACTCC  
TCCATACTCCGCAAGTACAAAGTGAGTCCTCCA , 6

TCACCAAAGTTGTTTCTCTCGCTTCCTCCTTCCCTCTCCCCCTTCCCCCCTCTCTTTAGATGGAAGTGAT  
TGTTGGGGACTTTGGGATCGTCGTGGTACCCAGTGATGCAGCGGACACAGACCGGATCATGAATCACTCC  
TCCATACTCCGCAAGTACAAAGTGAGTCCTCCA , 5  
TCACCAAAGTTGTTTCTCTCGCTTCCTCCTTCCCTCTCCCCCTTCCCCCCTCTCTTTAGATGGAAGTGAT  
TGTTGGGGACTTTGGGATCGTCGTGGTACCCCGTGATGCAGCGGACACAGACCGGATCATGAATCGCTCC  
TCCATACTCCGCAAGTACAAAGTGAGTCCTCCA , 5  
TCACCAAAGTTGTTTCTCTCGCTTCCTCCTTCCCTCTCCCCCTTCCCCCCTCTCTTTAGATGGAAGTGAT  
TGTTGGGGACTGTGGGATCGTCGTGGTACCCCGTGATGCAGCGGACACAGACCGGATCATGAATCACTCC  
TCCATACTCCGCAAGTACAAAGTGAGTCCTCCA , 4  
TCACCAAAGTTGTTTCTCTCGCTTCCTCCTTCCCTCTCCCCCTTCCCCCCTCTCTTTAGATGGAAGTGAT  
TGTTGGGGACTTTGGGATCGTCGTGGTACCCAGGGATGCAGCGGACACAGACCGGATCATGAATCACTCC  
TCCATGCTCCGCAAGTACAAAGTGAGTCCTCCA , 4  
TCACCAAAGTTGTTTCTCTCGCTTCCTCCTTCCCTCTCCCCCTTCCCCCCTCTCTTTAGATGGAAGTGAT  
TGTTGGGGACTTTGGGATCGTCGTGGTACCACGTGATGCAGCGGACACAGACCGGATCATGAATCACTCC  
TCCATACTCCGCAAGTACAAAGTGAGTCCTCCA , 4  
TCACCAAAGTTGTTTCTCTCGCTTCCTCCTTCCCTCTCCCCCTTCCCCCCTCTCTTTAGATGGAAGTGAT  
TGTTGGGGACTTTGGGATCGTCGTGGTACCCCGTGATGCAGCGGACACAGACCGGATCATGAATCACTCC  
TCCATACGCCGCAAGTACAAAGTGAGTCCTCCA , 4  
TCACCAAAGTTGTTTCTCTCGCTTCCTCCTTCCCTCTCCCCCTTCCCCCCTCTCTTTAGATGGAAGTGAT  
TGTTGGGGACTTTGGGATCGTCGTGGTACCCCGTGATGCAGCGGACACAGACTGGATCATGAATCACTCC  
TCCATACTCCGCAAGTACAAAGTGAGTCCTCCA , 4  
TCACCAAAGTTGTTTCTCTCGCTTCCTCCTTCCCTCTCCCCCTTCCCCCCTCTCTTTAGATGGAAGTGAT  
TGTTGGGGACTTTGGGATCGTCGTGGTACCCCGTGATGCAGCGGACACAGACCGTATCATGAATCACTCC  
TCCATACTCCGCAAGTACAAAGTGAGTCCTCCA , 3

GEIC-Plate01-D03 TOTAL:3200 OrderedDict([('WT\_sp1', 3150), ('R232Q',  
0), ('Silent Block Mod', 0), ('R232Q (Full ssODN)', 0), ('Silent Block  
Mod (Full ssODN)', 0)]) [(0, 3184), (-1, 15), (1, 1)]  
TCACCAAAGTTGTTTCTCTCGCTTCCTCCTTCCCTCTCCCCCTTCCCCCCTCTCTTTAGATGGAAGTGAT  
TGTTGGGGACTTTGGGATCGTCGTGGTACCCAGGGATGCAGCGGACACAGACCGGATCATGAATCACTCC  
TCCATACTCCGCAAGTACAAAGTGAGTCCTCCA , 2821  
TCACCAAAGTTGTTTCTCTCGCTTCCTCCTTCCCTCTCCCCCTTCCCCCCTCTCTTTAGATGGAAGTGAT  
TGTTGGGGACTTTGGGATCGTCGTGGTACCCAGGGATGCAGCGGACACGGACCGGATCATGAATCACTCC  
TCCATACTCCGCAAGTACAAAGTGAGTCCTCCA , 24  
TCACCAAAGTTGTTTCTCTCGCTTCCTCCTTCCCTCTCCCCCTTCCCCCCTCTCTTTAGATGGAAGTGAT  
TGTTGGGGACTTTGGGATCGTCGTGGTACCCAGGGATGCAGCGGACACAGACCGGATCATGAATCGCTCC  
TCCATACTCCGCAAGTACAAAGTGAGTCCTCCA , 10  
TCACCAAAGTTGTTTCTCTCGCTTCCTCCTTCCCTCTCCCCCTTCCCCCCTCTCTTTAGATGGAAGTGAT  
TGTTGGGGACTGTGGGATCGTCGTGGTACCCAGGGATGCAGCGGACACAGACCGGATCATGAATCACTCC  
TCCATACTCCGCAAGTACAAAGTGAGTCCTCCA , 9  
TCACCAAAGTTGTTTCTCTCGCTTCCTCCTTCCCTCTCCCCCTTCCCCCCTCTCTTTAGATGGAAGTGAT  
TGTTGGGGACTTTGGGATCGTCGTGGTACCCAGGGATGCAGCGGACACCGACCGGATCATGAATCACTCC  
TCCATACTCCGCAAGTACAAAGTGAGTCCTCCA , 7  
TCACCAAAGTTGTTTCTCTCGCTTCCTCCTTCCCTCTCCCCCTTCCCCCCTCTCTTTAGATGGAAGTGAT  
TGTTGGGGACTTTGGGATCGTCGTGGTACCCAGGGATGCAGCAGACACAGACCGGATCATGAATCACTCC  
TCCATACTCCGCAAGTACAAAGTGAGTCCTCCA , 6  
TCACCAAAGTTGTTTCTCTCGCTTCCTCCTTCCCTCTCCCCCTTCCCCCCTCTCTTTAGATGGAAGTGAT  
TGTTGGGGACTTTGGGATCGTCGTGGTACCCAGGGATGCAGCGGACACAGACCGGATCATGAATCACTCC  
TCCATACTCCGCAAGTACAAAGTGAGTCCTCCA , 5

TCACCAAAGTTGTTTCTCTCGCTTCCTCCTTCCCTCTCCCCCTTCCCCCCTCTCTTTAGATGGAAGTGGT  
TGTTGGGGACTTTGGGATCGTCGTGGTACCCAGGGATGCAGCGGACACAGACCGGATCATGAATCACTCC  
TCCATACTCCGCAAGTACAAAGTGAGTCCTCCA , 5  
TCACCAAAGTTGTTTCTCTCGCTTCCTCCTTCCCTCTCCCCCTTCCCCCCTCTCTTTAGATGGAAGTGAT  
TGTTGGGGACTTTGGGATCGTCGTGGTACCCAGGGATGCAGCGGACACAGACCGGATCATGAATCACTCC  
TCCATACTCCGCAAGTACCAAGTGAGTCCTCCA , 5  
TCACCAAAGTTGTTTCTCTCGCTTCCTCCTTCCCTCTCCCCCTTCCCCCCTCTCTTTAGATGGAAGTGAT  
TGTTGGGGACTTTGGGATCGTCGTGGTACCCAGGGATGCAGCGGACACAGGCCGGATCATGAATCACTCC  
TCCATACTCCGCAAGTACAAAGTGAGTCCTCCA , 4  
TCACCAAAGTTGTTTCTCTCGCTTCCTCCTTCCCTCTCCCCCTTCCCCCCTCTCTTTAGATGGAAGTGAT  
TGTTGGGGACTTTGGGATCGTCGTGGTACCCAGGGATGCAGCGGACACAGACCGGATCATGAATCACTCC  
TCCATACTCCGCAAGTACAAAGTGAGTCCTCCA , 4  
TCACCAAAGTTGTTTCTCTCGCTTCCTCCTTCCCTCTCCCCCTTCCCCCCTCTCTTTAGATGGAAGTGAT  
TGTTGGGGACTTTGGGATCTTCGTGGTACCCAGGGATGCAGCGGACACAGACCGGATCATGAATCACTCC  
TCCATACTCCGCAAGTACAAAGTGAGTCCTCCA , 4

GEIC-Plate01-D04 TOTAL:3493 OrderedDict([('WT\_sp1', 1783), ('R232Q',  
0), ('Silent Block Mod', 1637), ('R232Q (Full ssODN)', 0), ('Silent  
Block Mod (Full ssODN)', 1481)]) [(0, 3479), (-1, 13), (-2, 1)]  
TCACCAAAGTTGTTTCTCTCGCTTCCTCCTTCCCTCTCCCCCTTCCCCCCTCTCTTTAGATGGAAGTGAT  
TGTTGGGGACTTTGGGATCGTCGTGGTACCCAGGGATGCAGCGGACACAGACCGGATCATGAATCACTCC  
TCCATACTCCGCAAGTACAAAGTGAGTCCTCCA , 1577  
TCACCAAAGTTGTTTCTCTCGCTTCCTCCTTCCCTCTCCCCCTTCCCCCCTCTCTTTAGATGGAAGTGAT  
TGTTGGGGACTTTGGGATCGTCGTGGTACCCCGTGATGCAGCGGACACAGACCGGATCATGAATCACTCC  
TCCATACTCCGCAAGTACAAAGTGAGTCCTCCA , 1462  
TCACCAAAGTTGTTTCTCTCGCTTCCTCCTTCCCTCTCCCCCTTCCCCCCTCTCTTTAGATGGAAGTGAT  
TGTTGGGGACTTTGGGATCGTCGTGGTACCCAGGGATGCAGCGGACACGGACCGGATCATGAATCACTCC  
TCCATACTCCGCAAGTACAAAGTGAGTCCTCCA , 11  
TCACCAAAGTTGTTTCTCTCGCTTCCTCCTTCCCTCTCCCCCTTCCCCCCTCTCTTTAGATGGAAGTGAT  
TGTTGGGGACGTTGGGATCGTCGTGGTACCCAGGGATGCAGCGGACACAGACCGGATCATGAATCACTCC  
TCCATACTCCGCAAGTACAAAGTGAGTCCTCCA , 9  
TCACCAAAGTTGTTTCTCTCGCTTCCTCCTTCCCTCTCCCCCTTCCCCCCTCTCTTTAGATGGAAGTGAT  
TGTTGGGGACGTTGGGATCGTCGTGGTACCCCGTGATGCAGCGGACACAGACCGGATCATGAATCACTCC  
TCCATACTCCGCAAGTACAAAGTGAGTCCTCCA , 9  
TCACCAAAGTTGTTTCTCTCGCTTCCTCCTTCCCTCTCCCCCTTCCCCCCTCTCTTTAGATGGAAGTGAT  
TGTTGGGGACTGTGGGATCGTCGTGGTACCCAGGGATGCAGCGGACACAGACCGGATCATGAATCACTCC  
TCCATACTCCGCAAGTACAAAGTGAGTCCTCCA , 9  
TCACCAAAGTTGTTTCTCTCGCTTCCTCCTTCCCTCTCCCCCTTCCCCCCTCTCTTTAGATGGAAGTGAT  
TGTTGGGGACTTTGGGATCGTCGTGGTACCCAGGGATGCAGCGGACACAGGCCGGATCATGAATCACTCC  
TCCATACTCCGCAAGTACAAAGTGAGTCCTCCA , 7  
TCACCAAAGTTGTTTCTCTCGCTTCCTCCTTCCCTCTCCCCCTTCCCCCCTCTCTTTAGATGGAAGTGAT  
TGTTGGGGACTGTGGGATCGTCGTGGTACCCCGTGATGCAGCGGACACAGACCGGATCATGAATCACTCC  
TCCATACTCCGCAAGTACAAAGTGAGTCCTCCA , 7  
TCACCAAAGTTGTTTCTCTCGCTTCCTCCTTCCCTCTCCCCCTTCCCCCCTCTCTTTAGATGGAAGTGAT  
TGTTGGGGACTTTGGGATCGTCGTGGTACCCCGTGATGCAGCGGACACAGACCGGATCATGAATCACTCC  
TCCATACTCCGCAAGTACAAAGTGAGTCCTCCA , 5  
TCACCAAAGTTGTTTCTCTCGCTTCCTCCTTCCCTCTCCCCCTTCCCCCCTCTCTTTAGATGGAAGTGAT  
TGTTGGGGACTTTGGGATCGTCGTGGTACCCCGTGATGCAGCGGACACAGACCGGATCATGAATCACTCC  
TCCATGCTCCGCAAGTACAAAGTGAGTCCTCCA , 5

TCACCAAAGTTGTTTCTCTCGCTTCCTCCTTCCCTCTCCCCCTTCCCCCCTCTCTTTAGATGGAAGTGAT  
TGTTGGGGACTTTGGGATCGTCGTGGTACCCAGGGATGCAGCGGACACAGACCGGATCATGAATCGCTCC  
TCCATACTCCGCAAGTACAAAGTGAGTCCTCCA , 4  
TCACCAAAGTTGTTTCTCTCGCTTCCTCCTTCCCTCTCCCCCTTCCCCCCTCTCTTTAGATGGAAGTGAT  
TGTTGGGGACTTTGGGATCGTCGTGGTACCCAGGGATGCAGCGGGACACAGACCGGATCATGAATCACTCC  
TCCATACTCCGCAAGTACAAAGTGAGTCCTCCA , 4

GEIC-Plate01-D05 TOTAL:3857 OrderedDict([('WT\_sp1', 1892), ('R232Q', 1843), ('Silent Block Mod', 0), ('R232Q (Full ssODN)', 1642), ('Silent Block Mod (Full ssODN)', 0)]) [(0, 3841), (-1, 15), (1, 1)]  
TCACCAAAGTTGTTTCTCTCGCTTCCTCCTTCCCTCTCCCCCTTCCCCCCTCTCTTTAGATGGAAGTGAT  
TGTTGGGGACTTTGGGATCGTCGTGGTACCCAGGGATGCAGCGGACACAGACCGGATCATGAATCACTCC  
TCCATACTCCGCAAGTACAAAGTGAGTCCTCCA , 1674  
TCACCAAAGTTGTTTCTCTCGCTTCCTCCTTCCCTCTCCCCCTTCCCCCCTCTCTTTAGATGGAAGTGAT  
TGTTGGGGACTTTGGGATCGTCGTGGTACCCCAAGATGCAGCGGACACAGACCGGATCATGAATCACTCC  
TCCATACTCCGCAAGTACAAAGTGAGTCCTCCA , 1621  
TCACCAAAGTTGTTTCTCTCGCTTCCTCCTTCCCTCTCCCCCTTCCCCCCTCTCTTTAGATGGAAGTGAT  
TGTTGGGGACTGTGGGATCGTCGTGGTACCCAGGGATGCAGCGGACACAGACCGGATCATGAATCACTCC  
TCCATACTCCGCAAGTACAAAGTGAGTCCTCCA , 11  
TCACCAAAGTTGTTTCTCTCGCTTCCTCCTTCCCTCTCCCCCTTCCCCCCTCTCTTTAGATGGAAGTGAT  
TGTTGGGGACTTTGGGATCGTCGTGGTACCCCAAGATGCAGCGGACACAGACCGGATCATGAATCGCTCC  
TCCATACTCCGCAAGTACAAAGTGAGTCCTCCA , 11  
TCACCAAAGTTGTTTCTCTCGCTTCCTCCTTCCCTCTCCCCCTTCCCCCCTCTCTTTAGATGGAAGTGAT  
TGTTGGGGACTGTGGGATCGTCGTGGTACCCCAAGATGCAGCGGACACAGACCGGATCATGAATCACTCC  
TCCATACTCCGCAAGTACAAAGTGAGTCCTCCA , 10  
TCACCAAAGTTGTTTCTCTCGCTTCCTCCTTCCCTCTCCCCCTTCCCCCCTCTCTTTAGATGGAAGTGAT  
TGTTGGGGACGTTGGGATCGTCGTGGTACCCAGGGATGCAGCGGACACAGACCGGATCATGAATCACTCC  
TCCATACTCCGCAAGTACAAAGTGAGTCCTCCA , 9  
TCACCAAAGTTGTTTCTCTCGCTTCCTCCTTCCCTCTCCCCCTTCCCCCCTCTCTTTAGATGGAAGTGAT  
TGTTGGGGACGTTGGGATCGTCGTGGTACCCCAAGATGCAGCGGACACAGACCGGATCATGAATCACTCC  
TCCATACTCCGCAAGTACAAAGTGAGTCCTCCA , 9  
TCACCAAAGTTGTTTCTCTCGCTTCCTCCTTCCCTCTCCCCCTTCCCCCCTCTCTTTAGATGGAAGTGAT  
TGTTGGGGACTTTGGGATCGTCGTGGTACCCCAAGATGCAGCGGACACAGACCGGATCATGAATCACTCC  
TCCATACTCCGCAAGTACAAAGTGAGTCCTCCA , 7  
TCACCAAAGTTGTTTCTCTCGCTTCCTCCTTCCCTCTCCCCCTTCCCCCCTCTCTTTAGATGGAAGTGAT  
TGTTGGGGACTTTGGGATCGTCGTGGTACCCAGGGATGCAGCGGACACAGACCGGATCATGAATCACTCC  
TCCATACTCCGCAAGTACAAAGTGAGTCCTCCA , 7  
TCACCAAAGTTGTTTCTCTCGCTTCCTCCTTCCCTCTCCCCCTTCCCCCCTCTCTTTAGATGGAAGTGAT  
TGTTGGGGACTTTGGGATCGTCGTGGTACCCAGGGATGCAGCGGACACAGACCGGATCATGAATCGCTCC  
TCCATACTCCGCAAGTACAAAGTGAGTCCTCCA , 6  
TCACCAAAGTTGTTTCTCTCGCTTCCTCCTTCCCTCTCCCCCTTCCCCCCTCTCTTTAGATGGAAGTGAT  
TGTTGGGGACTTTGGGATCGTCGTGGTACCCCAAGATGCAGCGGACACAGACCGGATCATGAATCACTCC  
TCCATACTCCGCAAGTACAAAGTGAGTCCTCCA , 6  
TCACCAAAGTTGTTTCTCTCGCTTCCTCCTTCCCTCTCCCCCTTCCCCCCTCTCTTTAGATGGAAGTGAT  
TGTTGGGGACTTTGGGATCGTCGTGGTACCCCAAGATGCAGCGGACACAGACCGGATCATGAATCACTCC  
TCCATACTCCGCAAGTACAAAGTGAGTCCTCCA , 5

GEIC-Plate01-D06 TOTAL:3536 OrderedDict([('WT\_sp1', 1753), ('R232Q',

0), ('Silent Block Mod', 1720), ('R232Q (Full ssODN)', 0), ('Silent Block Mod (Full ssODN)', 1536)]) [(0, 3516), (-1, 19), (1, 1)]  
TCACCAAAGTTGTTTCTCTCGTTCCCTCCCTCTCCCCCTTCCCCCCTCTCTTTAGATGGAAGTGAT  
TGTTGGGGACTTTGGGATCGTCGTGGTACCCAGGGATGCAGCGGACACAGACCGGATCATGAATCACTCC  
TCCATACTCCGCAAGTACAAAGTGAGTCCTCCA , 1564  
TCACCAAAGTTGTTTCTCTCGTTCCCTCCCTCTCCCCCTTCCCCCCTCTCTTTAGATGGAAGTGAT  
TGTTGGGGACTTTGGGATCGTCGTGGTACCCCGTGATGCAGCGGACACAGACCGGATCATGAATCACTCC  
TCCATACTCCGCAAGTACAAAGTGAGTCCTCCA , 1518  
TCACCAAAGTTGTTTCTCTCGTTCCCTCCCTCTCCCCCTTCCCCCCTCTCTTTAGATGGAAGTGAT  
TGTTGGGGACTTTGGGATCGTCGTGGTACCCAGGGATGCAGCGGACACAGACCGGATCATGAATCACTCC  
TCCATACTCCGCAAGTACAAAGTGAGTCCTCCA , 15  
TCACCAAAGTTGTTTCTCTCGTTCCCTCCCTCTCCCCCTTCCCCCCTCTCTTTAGATGGAAGTGAT  
TGTTGGGGACTGTGGGATCGTCGTGGTACCCCGTGATGCAGCGGACACAGACCGGATCATGAATCACTCC  
TCCATACTCCGCAAGTACAAAGTGAGTCCTCCA , 11  
TCACCAAAGTTGTTTCTCTCGTTCCCTCCCTCTCCCCCTTCCCCCCTCTCTTTAGATGGAAGTGAT  
TGTTGGGGACTGTGGGATCGTCGTGGTACCCAGGGATGCAGCGGACACAGACCGGATCATGAATCACTCC  
TCCATACTCCGCAAGTACAAAGTGAGTCCTCCA , 10  
TCACCAAAGTTGTTTCTCTCGTTCCCTCCCTCTCCCCCTTCCCCCCTCTCTTTAGATGGAAGTGAT  
TGTTGGGGACTTTGGGATCGTCGTGGTACCCCGTGATGCAGCGGACACAGACCGGATCATGAATCGCTCC  
TCCATACTCCGCAAGTACAAAGTGAGTCCTCCA , 9  
TCACCAAAGTTGTTTCTCTCGTTCCCTCCCTCTCCCCCTTCCCCCCTCTCTTTAGATGGAAGTGAT  
TGTTGGGGACTTTGGGATCGTCGTGGTACCCCGTGATGCAGCGGACACAGACCGGATCATGAATCACTCC  
TCCATGCTCCGCAAGTACAAAGTGAGTCCTCCA , 8  
TCACCAAAGTTGTTTCTCTCGTTCCCTCCCTCTCCCCCTTCCCCCCTCTCTTTAGATGGAAGTGAT  
TGTTGGGGACTTTGGGATCGTCGTGGTACCCAGGGATGCAGCGGACACAGGCCGGATCATGAATCACTCC  
TCCATACTCCGCAAGTACAAAGTGAGTCCTCCA , 4  
TCACCAAAGTTGTTTCTCTCGTTCCCTCCCTCTCCCCCTTCCCCCCTCTCTTTAGATGGAAGTGAT  
TGTTGGGGACTTTGGGATCGTCGTGGTACCCAGTGATGCAGCGGACACAGACCGGATCATGAATCACTCC  
TCCATACTCCGCAAGTACAAAGTGAGTCCTCCA , 4  
TCACCAAAGTTGTTTCTCTCGTTCCCTCCCTCTCCCCCTTCCCCCCTCTCTTTAGATGGAAGTGAT  
TGTTGGGGACTTTGGGATCGTCGTGGTACCCCGTGATGCAGCGGACACAGACCGGATCATGAATCACTCC  
TCCATACTCCGCAAGTACAAAGTGAGTCCTCCA , 4  
TCACCAAAGTTGTTTCTCTCGTTCCCTCCCTCTCCCCCTTCCCCCCTCTCTTTAGATGGAAGTGAT  
TGTTGGGGACTTTGGGATCGTCGTGGTACCCAGGGATGCAGCGGACACAGACCGGATCATGAATCACTCC  
TCCATACTCCGCAAGTACAAAGTGAGTCCTCCA , 4

GEIC-Plate01-D07 TOTAL:3602 OrderedDict([('WT\_sp1', 3518), ('R232Q', 0), ('Silent Block Mod', 0), ('R232Q (Full ssODN)', 0), ('Silent Block Mod (Full ssODN)', 0)]) [(0, 3588), (-1, 13), (-29, 1)]  
TCACCAAAGTTGTTTCTCTCGTTCCCTCCCTCTCCCCCTTCCCCCCTCTCTTTAGATGGAAGTGAT  
TGTTGGGGACTTTGGGATCGTCGTGGTACCCAGGGATGCAGCGGACACAGACCGGATCATGAATCACTCC  
TCCATACTCCGCAAGTACAAAGTGAGTCCTCCA , 2993  
TCACCAAAGTTGTTTCTCTCGTTCCCTCCCTCTCCCCCTTCCCCCCTCTCTTTAGATGGAAGTGAT  
TGTTGGGGACTTTGGGATCGTCGTGGTACCCAGGGATGCAGCGGACACAGACCGGATCATGAATCACTCC  
TCCATACTCCGCAAGTACAAAGTGAGTCCTCCA , 27  
TCACCAAAGTTGTTTCTCTCGTTCCCTCCCTCTCCCCCTTCCCCCCTCTCTTTAGATGGAAGTGAT

TGTTGGGGACTTTGGGATCGTCGTGGTACCCAGGGATGCAGCGGACACAGACCGGATCATGAATCGCTCC  
TCCATACTCCGCAAGTACAAAGTGAGTCCTCCA , 25  
TCACCAAAGTTGTTTCTCTCGTTCCCTCCTTCCCTCTCCCCCTTCCCCCCTCTCTTTAGATGGAAGTGAT  
TGTTGGGGACTTTGGGATCGTCGTGGTACCCAGGGATGCAGCGGACACAGACCGGATCATGAATCACTCC  
TCCATACTCCGCAAGTACAAAGTGAGTCCTCCA , 20  
TCACCAAAGTTGTTTCTCTCGTTCCCTCCTTCCCTCTCCCCCTTCCCCCCTCTCTTTAGATGGAAGTGAT  
TGTTGGGGACTGTGGGATCGTCGTGGTACCCAGGGATGCAGCGGACACAGACCGGATCATGAATCACTCC  
TCCATACTCCGCAAGTACAAAGTGAGTCCTCCA , 14  
TCACCAAAGTTGTTTCTCTCGTTCCCTCCTTCCCTCTCCCCCTTCCCCCCTCTCTTTAGATGGAAGTGAT  
TGTTGGGGACTTTGGGATCGTCGTGGTACCCAGGGATGCAGCGGACACAGACCGGATCATGAATCACTCC  
TCCATGCTCCGCAAGTACAAAGTGAGTCCTCCA , 14  
TCACCAAAGTTGTTTCTCTCGTTCCCTCCTTCCCTCTCCCCCTTCCCCCCTCTCTTTAGATGGAAGTGAT  
TGTTGGGGACTTTGGGATCGTCGTGGTACCCAGGGATGCAGCGGACACAGACCGGATCATGAATCACTCC  
TCCATACTCCGCAAGTACCAAGTGAGTCCTCCA , 10  
TCACCAAAGTTGTTTCTCTCGTTCCCTCCTTCCCTCTCCCCCTTCCCCCCTCTCTTTAGATGGAAGTGAT  
TGTTGGGGACTTTGGGATCGTCGTGGTACCCAGGGATGCAGCGGACACAGACCGGATCATGAATCACTCC  
GCCATACTCCGCAAGTACAAAGTGAGTCCTCCA , 8  
TCACCAAAGTTGTTTCTCTCGTTCCCTCCTTCCCTCTCCCCCTTCCCCCCTCTCTTTAGATGGAAGTGAT  
TGTTGGGGACTTTGGGATCGTCGTGGTACCCAGGGATGCAGCGGACACAGACCGGATCATGAATCACTCC  
TCCATACGCCGCAAGTACAAAGTGAGTCCTCCA , 7  
TCACCAAAGTTGTTTCTCTCGTTCCCTCCTTCCCTCTCCCCCTTCCCCCCTCTCTTTAGATGGAAGTGAT  
TGTTGGGGACTTTGGGATCGTCGTGGTACCCAGGGATGCAGCGGACACCGACCGGATCATGAATCACTCC  
TCCATACTCCGCAAGTACAAAGTGAGTCCTCCA , 6  
TCACCAAAGTTGTTTCTCTCGTTCCCTCCTTCCCTCTCCCCCTTCCCCCCTCTCTTTAGATGGAAGTGAT  
TGTTGGGGACTTTGGGATCGTCGTGGTACCCAGGGATGCAGCGGACACAGGCCGGATCATGAATCACTCC  
TCCATACTCCGCAAGTACAAAGTGAGTCCTCCA , 6  
TCACCAAAGTTGTTTCTCTCGTTCCCTCCTTCCCTCTCCCCCTTCCCCCCTCTCTTTAGATGGAAGTGAG  
TGTTGGGGACTTTGGGATCGTCGTGGTACCCAGGGATGCAGCGGACACAGACCGGATCATGAATCACTCC  
TCCATACTCCGCAAGTACAAAGTGAGTCCTCCA , 6

GEIC-Plate01-D08 TOTAL:3790 OrderedDict([('WT\_sp1', 3726), ('R232Q',  
0), ('Silent Block Mod', 1), ('R232Q (Full ssODN)', 0), ('Silent Block  
Mod (Full ssODN)', 1)]) [(0, 3770), (-1, 19), (1, 1)]  
TCACCAAAGTTGTTTCTCTCGTTCCCTCCTTCCCTCTCCCCCTTCCCCCCTCTCTTTAGATGGAAGTGAT  
TGTTGGGGACTTTGGGATCGTCGTGGTACCCAGGGATGCAGCGGACACAGACCGGATCATGAATCACTCC  
TCCATACTCCGCAAGTACAAAGTGAGTCCTCCA , 3319  
TCACCAAAGTTGTTTCTCTCGTTCCCTCCTTCCCTCTCCCCCTTCCCCCCTCTCTTTAGATGGAAGTGAT  
TGTTGGGGACTTTGGGATCGTCGTGGTACCCAGGGATGCAGCGGACACAGACCGGATCATGAATCGCTCC  
TCCATACTCCGCAAGTACAAAGTGAGTCCTCCA , 17  
TCACCAAAGTTGTTTCTCTCGTTCCCTCCTTCCCTCTCCCCCTTCCCCCCTCTCTTTAGATGGAAGTGAT  
TGTTGGGGACTTTGGGATCGTCGTGGTACCCAGGGATGCAGCGGACACGGACCGGATCATGAATCACTCC  
TCCATACTCCGCAAGTACAAAGTGAGTCCTCCA , 17  
TCACCAAAGTTGTTTCTCTCGTTCCCTCCTTCCCTCTCCCCCTTCCCCCCTCTCTTTAGATGGAAGTGAT  
TGTTGGGGACTGTGGGATCGTCGTGGTACCCAGGGATGCAGCGGACACAGACCGGATCATGAATCACTCC  
TCCATACTCCGCAAGTACAAAGTGAGTCCTCCA , 13  
TCACCAAAGTTGTTTCTCTCGTTCCCTCCTTCCCTCTCCCCCTTCCCCCCTCTCTTTAGATGGAAGTGAT  
TGTTGGGGACTTTGGGATCGTCGTGGTACCCAGGGATGCAGCGGACACAGACCGGATCATGAATCACTCC  
TCCATACTCCGCAAGTACAAAGTGAGTCCTCCA , 10  
TCACCAAAGTTGTTTCTCTCGTTCCCTCCTTCCCTCTCCCCCTTCCCCCCTCTCTTTAGATGGAAGTGAT

TGTTGGGGACTTTGGGATCGTCGTGGTACCCAGGGATGCAGCGGACACAGACCGGATCATGAATCACTCC  
TCCATGCTCCGCAAGTACAAAGTGAGTCCTCCA , 7  
TCACCAAAGTTGTTTCTCTCGCTTCCTCCTTCCCTCTCCCCCTTCCCCCCTCTCTTTAGATGGAAGTGAT  
TGTTGGGGACTTTGGGATCGTCGTGGTACCCAGGGATGCAGCGGACACAGGCCGGATCATGAATCACTCC  
TCCATACTCCGCAAGTACAAAGTGAGTCCTCCA , 6  
TCACCAAAGTTGTTTCTCTCGCTTCCTCCTTCCCTCTCCCCCTTCCCCCCTCTCTTTAGATGGAAGTGAT  
TGTTGGGGACTTTGGGATCGTCGTGGTACCCAGGGATGCAGAGGACACAGACCGGATCATGAATCACTCC  
TCCATACTCCGCAAGTACAAAGTGAGTCCTCCA , 6  
TCACCAAAGTTGTTTCTCTCGCTTCCTCCTTCCCTCTCCCCCTTCCCCCCTCTCTTTAGATGGAAGTGAT  
TGTTGGGGACTTTGGGATCGTCGTGGTACCCAGGGATGCAGCGGACACAGACCGGATCATGAATCACTCC  
GCCATACTCCGCAAGTACAAAGTGAGTCCTCCA , 5  
TCACCAAAGTTGTTTCTCTCGCTTCCTCCTTCCCTCTCCCCCTTCCCCCCTCTCTTTAGATGGAAGTGAT  
TGTTGGGGACTATGGGATCGTCGTGGTACCCAGGGATGCAGCGGACACAGACCGGATCATGAATCACTCC  
TCCATACTCCGCAAGTACAAAGTGAGTCCTCCA , 4  
TCACCAAAGTTGTTTCTCTCGCTTCCTCCTTCCCTCTCCCCCTTCCCCCCTCTCTTTAGATGGAAGTGAT  
TGTTGGGGACTTTGGGATCGTCGTGGTACCCAGGGATGCAGCGGACACTGACCGGATCATGAATCACTCC  
TCCATACTCCGCAAGTACAAAGTGAGTCCTCCA , 4  
TCACCAAAGTTGTTTCTCTCGCTTCCTCCTTCCCTCTCCCCCTTCCCCCCTCTCTTTAGATGGAAGTGAT  
TGTTGGGGACTTTGGGATCGTCGTGGTACCCAGGGATGCAGCGGACACCGACCGGATCATGAATCACTCC  
TCCATACTCCGCAAGTACAAAGTGAGTCCTCCA , 4

GEIC-Plate01-E01 TOTAL:3408 OrderedDict([('WT\_sp1', 1762), ('R232Q',  
4), ('Silent Block Mod', 1552), ('R232Q (Full ssODN)', 3), ('Silent  
Block Mod (Full ssODN)', 1422)]) [(0, 3393), (-1, 12), (1, 3)]  
TCACCAAAGTTGTTTCTCTCGCTTCCTCCTTCCCTCTCCCCCTTCCCCCCTCTCTTTAGATGGAAGTGAT  
TGTTGGGGACTTTGGGATCGTCGTGGTACCCAGGGATGCAGCGGACACAGACCGGATCATGAATCACTCC  
TCCATACTCCGCAAGTACAAAGTGAGTCCTCCA , 1536  
TCACCAAAGTTGTTTCTCTCGCTTCCTCCTTCCCTCTCCCCCTTCCCCCCTCTCTTTAGATGGAAGTGAT  
TGTTGGGGACTTTGGGATCGTCGTGGTACCCCGTGATGCAGCGGACACAGACCGGATCATGAATCACTCC  
TCCATACTCCGCAAGTACAAAGTGAGTCCTCCA , 1409  
TCACCAAAGTTGTTTCTCTCGCTTCCTCCTTCCCTCTCCCCCTTCCCCCCTCTCTTTAGATGGAAGTGAT  
TGTTGGGGACTTTGGGATCGTCGTGGTACCCAGGGATGCAGCGGACACGGACCGGATCATGAATCACTCC  
TCCATACTCCGCAAGTACAAAGTGAGTCCTCCA , 12  
TCACCAAAGTTGTTTCTCTCGCTTCCTCCTTCCCTCTCCCCCTTCCCCCCTCTCTTTAGATGGAAGTGAT  
TGTTGGGGACGTTGGGATCGTCGTGGTACCCAGGGATGCAGCGGACACAGACCGGATCATGAATCACTCC  
TCCATACTCCGCAAGTACAAAGTGAGTCCTCCA , 11  
TCACCAAAGTTGTTTCTCTCGCTTCCTCCTTCCCTCTCCCCCTTCCCCCCTCTCTTTAGATGGAAGTGAT  
TGTTGGGGACTGTGGGATCGTCGTGGTACCCCGTGATGCAGCGGACACAGACCGGATCATGAATCACTCC  
TCCATACTCCGCAAGTACAAAGTGAGTCCTCCA , 8  
TCACCAAAGTTGTTTCTCTCGCTTCCTCCTTCCCTCTCCCCCTTCCCCCCTCTCTTTAGATGGAAGTGAT  
TGTTGGGGACTGTGGGATCGTCGTGGTACCCAGGGATGCAGCGGACACAGACCGGATCATGAATCACTCC  
TCCATACTCCGCAAGTACAAAGTGAGTCCTCCA , 7  
TCACCAAAGTTGTTTCTCTCGCTTCCTCCTTCCCTCTCCCCCTTCCCCCCTCTCTTTAGATGGAAGTGAT  
TGTTGGGGACGTTGGGATCGTCGTGGTACCCCGTGATGCAGCGGACACAGACCGGATCATGAATCACTCC  
TCCATACTCCGCAAGTACAAAGTGAGTCCTCCA , 6  
TCACCAAAGTTGTTTCTCTCGCTTCCTCCTTCCCTCTCCCCCTTCCCCCCTCTCTTTAGATGGAAGTGAT  
TGTTGGGGACTTTGGGATCGTCGTGGTACCCAGGGATGCAGCGGACACCGACCGGATCATGAATCACTCC  
TCCATACTCCGCAAGTACAAAGTGAGTCCTCCA , 5  
TCACCAAAGTTGTTTCTCTCGCTTCCTCCTTCCCTCTCCCCCTTCCCCCCTCTCTTTAGATGGAAGTGAT

TGTTGGGGACTTTGGGATCGTCGTGGTACCCCGTGATGCAGCGGACACAGACCGGATCATGAATCACTCC  
TCCATGCTCCGCAAGTACAAAGTGAGTCCTCCA , 5  
TCACCAAAGTTGTTTCTCTCGTTCCCTCCTTCCCTCTCCCCCTTCCCCCCTCTCTTTAGATGGAAGTGAT  
TGTTGGGGACTTTGGGATCGTCGTGGTACCCAGTGATGCAGCGGACACAGACCGGATCATGAATCACTCC  
TCCATACTCCGCAAGTACAAAGTGAGTCCTCCA , 5  
TCACCAAAGTTGTTTCTCTCGTTCCCTCCTTCCCTCTCCCCCTTCCCCCCTCTCTTTAGATGGAAGTGAT  
TGTTGGGGACTTTGGGATCGTCGTGGTACCCCGTGATGCAGCGGACACAGACCAGATCATGAATCACTCC  
TCCATACTCCGCAAGTACAAAGTGAGTCCTCCA , 4  
TCACCAAAGTTGTTTCTCTCGTTCCCTCCTTCCCTCTCCCCCTTCCCCCCTCTCTTTAGATGGAAGTGATT  
GTTGGGGACTTTGGGATCGTCGTGGTACCCCGTGATGCAGCGGACACAGACCGGATCATGAATCACTCCT  
CCATACTCCGCAAGTACAAAGTGAGTCCTCCA , 4

GEIC-Plate01-E02 TOTAL:2273 OrderedDict([('WT\_sp1', 1050), ('R232Q',  
0), ('Silent Block Mod', 1170), ('R232Q (Full ssODN)', 0), ('Silent  
Block Mod (Full ssODN)', 1053)]) [(0, 2254), (-1, 16), (1, 3)]  
TCACCAAAGTTGTTTCTCTCGTTCCCTCCTTCCCTCTCCCCCTTCCCCCCTCTCTTTAGATGGAAGTGAT  
TGTTGGGGACTTTGGGATCGTCGTGGTACCCCGTGATGCAGCGGACACAGACCGGATCATGAATCACTCC  
TCCATACTCCGCAAGTACAAAGTGAGTCCTCCA , 1040  
TCACCAAAGTTGTTTCTCTCGTTCCCTCCTTCCCTCTCCCCCTTCCCCCCTCTCTTTAGATGGAAGTGAT  
TGTTGGGGACTTTGGGATCGTCGTGGTACCCAGGGATGCAGCGGACACAGACCGGATCATGAATCACTCC  
TCCATACTCCGCAAGTACAAAGTGAGTCCTCCA , 920  
TCACCAAAGTTGTTTCTCTCGTTCCCTCCTTCCCTCTCCCCCTTCCCCCCTCTCTTTAGATGGAAGTGAT  
TGTTGGGGACTTTGGGATCGTCGTGGTACCCAGGGATGCAGCGGACACAGACCGGATCATGAATCACTCC  
TCCATACTCCGCAAGTACAAAGTGAGTCCTCCA , 9  
TCACCAAAGTTGTTTCTCTCGTTCCCTCCTTCCCTCTCCCCCTTCCCCCCTCTCTTTAGATGGAAGTGAT  
TGTTGGGGACTTTGGGATCGTCGTGGTACCCCGTGATGCAGCGGACACAGACCGGATCATGAATCACTCC  
TCCATACTCCGCAAGTACAAAGTGAGTCCTCCA , 7  
TCACCAAAGTTGTTTCTCTCGTTCCCTCCTTCCCTCTCCCCCTTCCCCCCTCTCTTTAGATGGAAGTGAT  
TGTTGGGGACTTTGGGATCGTCGTGGTACCCCGTGATGCAGCAGACACAGACCGGATCATGAATCACTCC  
TCCATACTCCGCAAGTACAAAGTGAGTCCTCCA , 7  
TCACCAAAGTTGTTTCTCTCGTTCCCTCCTTCCCTCTCCCCCTTCCCCCCTCTCTTTAGATGGAAGTGAT  
TGTTGGGGACTTTGGGATCGTCGTGGTACCCAGGGATGCAGCGGACACAGACCGGATCATGAATCACTCC  
TCCATACTCCGCAAGTACAAAGTGAGTCCTCCA , 6  
TCACCAAAGTTGTTTCTCTCGTTCCCTCCTTCCCTCTCCCCCTTCCCCCCTCTCTTTAGATGGAAGTGAT  
TGTTGGGGACTTTGGGATCGTCGTGGTACCCCGTGATGCAGCGGACACAGACCGGATCATGAATCACTCC  
TCCATACTCCGCAAGTACAAAGTGAGTCCTCCA , 5  
TCACCAAAGTTGTTTCTCTCGTTCCCTCCTTCCCTCTCCCCCTTCCCCCCTCTCTTTAGATGGAAGTGATT  
GTTGGGGACTTTGGGATCGTCGTGGTACCCCGTGATGCAGCGGACACAGACCGGATCATGAATCACTCCT  
CCATACTCCGCAAGTACAAAGTGAGTCCTCCA , 4  
TCACCAAAGTTGTTTCTCTCGTTCCCTCCTTCCCTCTCCCCCTTCCCCCCTCTCTTTAGATGGAAGTGAT  
TGTTGGGGACTTTGGGATCGTCGTGGTACCCCGTGATGCAGCGGACACAGACCGGATCATGAATCGCTCC  
TCCATACTCCGCAAGTACAAAGTGAGTCCTCCA , 4  
TCACCAAAGTTGTTTCTCTCGTTCCCTCCTTCCCTCTCCCCCTTCCCCCCTCTCTTTAGATGGAAGTGAT  
TGTTGGGGACTTTGGGATCGTCGTGGTACCCCGTGATGCAGCGGACACAGACCGGATCATGAATCACTCC  
TCCATACTCCGCAAGTACAAAGTGAGTCCTCCA , 4  
TCACCAAAGTTGTTTCTCTCGTTCCCTCCTTCCCTCTCCCCCTTCCCCCCTCTCTTTAGATGGAAGTGATT  
GTTGGGGACTTTGGGATCGTCGTGGTACCCAGGGATGCAGCGGACACAGACCGGATCATGAATCACTCCT  
CCATACTCCGCAAGTACAAAGTGAGTCCTCCA , 3  
TCACCAAAGTTGTTTCTCTCGTTCCCTCCTTCCCTCTCCCCCTTCCCCCCTCTCTTTAGATGGAAGTGAT

TGTTGGGGACTTTGGGATCGTCGTGGTACCCCGTGATGCAGCGGACACAGACCGGATCATGAATCACTCC  
TCCATACTCCGCAAGTACCAAGTGAGTCCTCCA , 3

GEIC-Plate01-E03 TOTAL:2941 OrderedDict([('WT\_sp1', 2885), ('R232Q',  
0), ('Silent Block Mod', 0), ('R232Q (Full ssODN)', 0), ('Silent Block  
Mod (Full ssODN)', 0)]) [(0, 2927), (-1, 13), (-5, 1)]

TCACCAAAGTTGTTTCTCTCGTTCCCTCCTTCCCTCTCCCCCTTCCCCCCTCTCTTTAGATGGAAGTGAT  
TGTTGGGGACTTTGGGATCGTCGTGGTACCCAGGGATGCAGCGGACACAGACCGGATCATGAATCACTCC  
TCCATACTCCGCAAGTACAAAGTGAGTCCTCCA , 2553

TCACCAAAGTTGTTTCTCTCGTTCCCTCCTTCCCTCTCCCCCTTCCCCCCTCTCTTTAGATGGAAGTGAT  
TGTTGGGGACTTTGGGATCGTCGTGGTACCCAGGGATGCAGCGGACACAGACCGGATCATGAATCACTCC  
TCCATACTCCGCAAGTACAAAGTGAGTCCTCCA , 18

TCACCAAAGTTGTTTCTCTCGTTCCCTCCTTCCCTCTCCCCCTTCCCCCCTCTCTTTAGATGGAAGTGAT  
TGTTGGGGACTTTGGGATCGTCGTGGTACCCAGGGATGCAGCGGACACAGACCGGATCATGAATCGCTCC  
TCCATACTCCGCAAGTACAAAGTGAGTCCTCCA , 10

TCACCAAAGTTGTTTCTCTCGTTCCCTCCTTCCCTCTCCCCCTTCCCCCCTCTCTTTAGATGGAAGTGAT  
TGTTGGGGACTGTGGGATCGTCGTGGTACCCAGGGATGCAGCGGACACAGACCGGATCATGAATCACTCC  
TCCATACTCCGCAAGTACAAAGTGAGTCCTCCA , 10

TCACCAAAGTTGTTTCTCTCGTTCCCTCCTTCCCTCTCCCCCTTCCCCCCTCTCTTTAGATGGAAGTGAT  
TGTTGGGGACTTTGGGATCGTCGTGGTACCCAGGGATGCAGCGGACACAGACCGGATCATGAATCACTCC  
TCCATACTCCGCAAGTACAAAGTGAGTCCTCCA , 7

TCACCAAAGTTGTTTCTCTCGTTCCCTCCTTCCCTCTCCCCCTTCCCCCCTCTCTTTAGATGGAAGTGAT  
TGTTGGGGACTTTGGGATCGTCGTGGTACCCAGGGATGCAGCGGACACAGACCGGATCATGAATCACTCC  
TCCATACTCCGCAAGTACAAAGTGAGTCCTCCA , 5

TCACCAAAGTTGTTTCTCTCGTTCCCTCCTTCCCTCTCCCCCTTCCCCCCTCTCTTTAGATGGAAGTGAT  
TGTTGGGGACTTTGGGATCGTCGTGGTACCCAGGGATGCAGCGGACACAGACCGGATCATGAATCACTCA  
TCCATACTCCGCAAGTACAAAGTGAGTCCTCCA , 5

TCACCAAAGTTGTTTCTCTCGTTCCCTCCTTCCCTCTCCCCCTTCCCCCCTCTCTTTAGATGGAAGTGAT  
TGTTGGGGACTTTGGGATCGTCGTGGTACCCAGGGATGCAGCGGACACAGACCGGATCATGAATCACTCC  
TCCATGCTCCGCAAGTACAAAGTGAGTCCTCCA , 5

TCACCAAAGTTGTTTCTCTCGTTCCCTCCTTCCCTCTCCCCCTTCCCCCCTCTCTTTAGATGGAAGTGAT  
TGTTGGGGACTTTGGGATCGTCGTGGTACCCAGGGATGCAGCGGACACAGACCGGATCATGAATCACTCC  
GCCATACTCCGCAAGTACAAAGTGAGTCCTCCA , 5

TCACCAAAGTTGTTTCTCTCGTTCCCTCCTTCCCTCTCCCCCTTCCCCCCTCTCTTTAGATGGAAGTGAT  
TGTTGGGGACTTTGGGATCGTCGTGGTACCCAGGGATGCAGCGGACACAGACCGGATCATGAATCACTCC  
TCCATACGCCGCAAGTACAAAGTGAGTCCTCCA , 4

TCACCAAAGTTGTTTCTCTCGTTCCCTCCTTCCCTCTCCCCCTTCCCCCCTCTCTTTAGATGGAAGTGATT  
GTTGGGGACTTTGGGATCGTCGTGGTACCCAGGGATGCAGCGGACACAGACCGGATCATGAATCACTCCT  
CCATACTCCGCAAGTACAAAGTGAGTCCTCCA , 4

TCACCAAAGTTGTTTCTCTCGTTCCCTCCTTCCCTCTCCCCCTTCCCCCCTCTCTTTAGATGGAAGTGAT  
TGTTGGGGACTTTGGGATCGTCGTGGTACCCAGGGATGCAGCGGACACAGACCGGATCATGAATCACTCC  
TCCATACTCCGCAAGTACAAAGTGAGTCCTCCA , 4

GEIC-Plate01-E04 TOTAL:3316 OrderedDict([('WT\_sp1', 3262), ('R232Q',  
0), ('Silent Block Mod', 0), ('R232Q (Full ssODN)', 0), ('Silent Block  
Mod (Full ssODN)', 0)]) [(0, 3305), (-1, 10), (1, 1)]

TCACCAAAGTTGTTTCTCTCGTTCCCTCCTTCCCTCTCCCCCTTCCCCCCTCTCTTTAGATGGAAGTGAT  
TGTTGGGGACTTTGGGATCGTCGTGGTACCCAGGGATGCAGCGGACACAGACCGGATCATGAATCACTCC

TCCATACTCCGCAAGTACAAAGTGAGTCCTCCA , 2923  
TCACCAAAGTTGTTTCTCTCGCTTCCTCCTTCCCTCTCCCCCTTCCCCCCTCTCTTTAGATGGAAGTGAT  
TGTTGGGGACTGTGGGATCGTCGTGGTACCCAGGGATGCAGCGGACACAGACCGGATCATGAATCACTCC  
TCCATACTCCGCAAGTACAAAGTGAGTCCTCCA , 13  
TCACCAAAGTTGTTTCTCTCGCTTCCTCCTTCCCTCTCCCCCTTCCCCCCTCTCTTTAGATGGAAGTGAT  
TGTTGGGGACTTTGGGATCGTCGTGGTACCCAGGGATGCAGCGGACACCGACCGGATCATGAATCACTCC  
TCCATACTCCGCAAGTACAAAGTGAGTCCTCCA , 11  
TCACCAAAGTTGTTTCTCTCGCTTCCTCCTTCCCTCTCCCCCTTCCCCCCTCTCTTTAGATGGAAGTGAT  
TGTTGGGGACTTTGGGATCGTCGTGGTACCCAGGGATGCAGCGGACACCGACCGGATCATGAATCACTCC  
TCCATACTCCGCAAGTACAAAGTGAGTCCTCCA , 11  
TCACCAAAGTTGTTTCTCTCGCTTCCTCCTTCCCTCTCCCCCTTCCCCCCTCTCTTTAGATGGAAGTGAT  
TGTTGGGGACGTTGGGATCGTCGTGGTACCCAGGGATGCAGCGGACACAGACCGGATCATGAATCACTCC  
TCCATACTCCGCAAGTACAAAGTGAGTCCTCCA , 9  
TCACCAAAGTTGTTTCTCTCGCTTCCTCCTTCCCTCTCCCCCTTCCCCCCTCTCTTTAGATGGAAGTGAT  
TGTTGGGGACTTTGGGATCGTCGTGGTACCCAGGGATGCAGCGGACACAGACCGGATCATGAATCGCTCC  
TCCATACTCCGCAAGTACAAAGTGAGTCCTCCA , 7  
TCACCAAAGTTGTTTCTCTCGCTTCCTCCTTCCCTCTCCCCCTTCCCCCCTCTCTTTAGATGGAAGTGAT  
TGTTGGGGACTTTGGGATCGTCGTGGTACCCAGGGATGCAGCGGACACAGACCGATCATGAATCACTCC  
TCCATACTCCGCAAGTACAAAGTGAGTCCTCCA , 6  
TCACCAAAGTTGTTTCTCTCGCTTCCTCCTTCCCTCTCCCCCTTCCCCCCTCTCTTTAGATGGAAGTGGT  
TGTTGGGGACTTTGGGATCGTCGTGGTACCCAGGGATGCAGCGGACACAGACCGGATCATGAATCACTCC  
TCCATACTCCGCAAGTACAAAGTGAGTCCTCCA , 5  
TCACCAAAGTTGTTTCTCTCGCTTCCTCCTTCCCTCTCCCCCTTCCCCCCTCTCTTTAGATGGAAGTGAT  
TGTTGGGGACTTTGGGATCGTCGTGGTACCCAGGGATGCAGCGGACACAGACCGGATCATGAATCACTCC  
TCCATACTCCGCAAGTACAAAGTGAGTCCTCCA , 5  
TCACCAAAGTTGTTTCTCTCGCTTCCTCCTTCCCTCTCCCCCTTCCCCCCTCTCTTTAGATGGAAGTGAT  
TGTTGGGGACTTTGGGATCGTCGTGGTACCCAGGGATGCAGCGGACACAGACCGGATCATGAATCTCTCC  
TCCATACTCCGCAAGTACAAAGTGAGTCCTCCA , 4  
TCACCAAAGTTGTTTCTCTCGCTTCCTCCTTCCCTCTCCCCCTTCCCCCCTCTCTTTAGATGGAAGTGATT  
GTTGGGGACTTTGGGATCGTCGTGGTACCCAGGGATGCAGCGGACACAGACCGGATCATGAATCACTCCT  
CCATACTCCGCAAGTACAAAGTGAGTCCTCCA , 4  
TCACCAAAGTTGTTTCTCTCGCTTCCTCCTTCCCTCTCCCCCTTCCCCCCTCTCTTTAGATGGAAGTGAT  
TGTTGGGGACTTTGGGATCGTCGTGGTACCCAGGGATGCAGCGGACACAGACCGGATCATGAATCACTCC  
TCCATGCTCCGCAAGTACAAAGTGAGTCCTCCA , 4

GEIC-Plate01-E05 TOTAL:3732 OrderedDict([('WT\_sp1', 1794), ('R232Q', 1868), ('Silent Block Mod', 0), ('R232Q (Full ssODN)', 1727), ('Silent Block Mod (Full ssODN)', 0)]) [(0, 3717), (-1, 14), (1, 1)]  
TCACCAAAGTTGTTTCTCTCGCTTCCTCCTTCCCTCTCCCCCTTCCCCCCTCTCTTTAGATGGAAGTGAT  
TGTTGGGGACTTTGGGATCGTCGTGGTACCCAAAGATGCAGCGGACACAGACCGGATCATGAATCACTCC  
TCCATACTCCGCAAGTACAAAGTGAGTCCTCCA , 1704  
TCACCAAAGTTGTTTCTCTCGCTTCCTCCTTCCCTCTCCCCCTTCCCCCCTCTCTTTAGATGGAAGTGAT  
TGTTGGGGACTTTGGGATCGTCGTGGTACCCAGGGATGCAGCGGACACAGACCGGATCATGAATCACTCC  
TCCATACTCCGCAAGTACAAAGTGAGTCCTCCA , 1600  
TCACCAAAGTTGTTTCTCTCGCTTCCTCCTTCCCTCTCCCCCTTCCCCCCTCTCTTTAGATGGAAGTGAT  
TGTTGGGGACTTTGGGATCGTCGTGGTACCCAGGGATGCAGCGGACACCGACCGGATCATGAATCACTCC  
TCCATACTCCGCAAGTACAAAGTGAGTCCTCCA , 10  
TCACCAAAGTTGTTTCTCTCGCTTCCTCCTTCCCTCTCCCCCTTCCCCCCTCTCTTTAGATGGAAGTGAT  
TGTTGGGGACTTTGGGATCGTCGTGGTACCCAGGGATGCAGCGGACACAGACCGGATCATGAATCGCTCC

TCCATACTCCGCAAGTACAAAGTGAGTCCTCCA , 8  
TCACCAAAGTTGTTTCTCTCGCTTCCTCCTTCCCTCTCCCCCTTCCCCCCTCTCTTTAGATGGAAGTGAT  
TGTTGGGGACTTTGGGATCGTCGTGGTACCCCAAGATGCAGCGGACACAGACCGGATCATGAATCACTCC  
TCCATACTCCGCAAGTACAAAGTGAGTCCTCCA , 7  
TCACCAAAGTTGTTTCTCTCGCTTCCTCCTTCCCTCTCCCCCTTCCCCCCTCTCTTTAGATGGAAGTGAT  
TGTTGGGGACTGTGGGATCGTCGTGGTACCCCAAGATGCAGCGGACACAGACCGGATCATGAATCACTCC  
TCCATACTCCGCAAGTACAAAGTGAGTCCTCCA , 7  
TCACCAAAGTTGTTTCTCTCGCTTCCTCCTTCCCTCTCCCCCTTCCCCCCTCTCTTTAGATGGAAGTGAT  
TGTTGGGGACTTTGGGATCGTCGTGGTACCCCAAGATGCAGCGGACACAGACCGGATCATGAATCACTCC  
TCCATACTCCGCAAGTACAAAGTGAGTCCTCCA , 6  
TCACCAAAGTTGTTTCTCTCGCTTCCTCCTTCCCTCTCCCCCTTCCCCCCTCTCTTTAGATGGAAGTGAT  
TGTTGGGGACTTTGGGATCGTCGTGGTACCCAGGGATGCAGCGGACACAGACCGGATCATGAATCACTCC  
TCCATACTCCGCAAGTACAAAGTGAGTCCTCCA , 6  
TCACCAAAGTTGTTTCTCTCGCTTCCTCCTTCCCTCTCCCCCTTCCCCCCTCTCTTTAGATGGAAGTGAT  
TGTTGGGGACTTTGGGATCGTCGTGGTACCCCAAGATGCAGCGGACACAGACCGGATCATGAATCACTCC  
TCCATGCTCCGCAAGTACAAAGTGAGTCCTCCA , 5  
TCACCAAAGTTGTTTCTCTCGCTTCCTCCTTCCCTCTCCCCCTTCCCCCCTCTCTTTAGATGGAAGTGAT  
TGTTGGGGACTTTGGGATCGTCGTGGTACCCAGGGATGCAGCGGACACAGGCGGATCATGAATCACTCC  
TCCATACTCCGCAAGTACAAAGTGAGTCCTCCA , 4  
TCACCAAAGTTGTTTCTCTCGCTTCCTCCTTCCCTCTCCCCCTTCCCCCCTCTCTTTAGATGGAAGTGAT  
TGTTGGGGACTTTGGGATCGTCGTGGTACCCAGGGATGCAGCGGACACAGACCGGATCATGAATCACTCC  
TCCATACTCCGCAAGTACAAAGTGAGTCCTCCA , 4  
TCACCAAAGTTGTTTCTCTCGCTTCCTCCTTCCCTCTCCCCCTTCCCCCCTCTCTTTAGATGGAAGTGAT  
TGTTGGGGACTTTGGGATCGTCGTGGTGCCCCAAGATGCAGCGGACACAGACCGGATCATGAATCACTCC  
TCCATACTCCGCAAGTACAAAGTGAGTCCTCCA , 4

GEIC-Plate01-E06 TOTAL:4484 OrderedDict([('WT\_sp1', 2216), ('R232Q', 0), ('Silent Block Mod', 2146), ('R232Q (Full ssODN)', 0), ('Silent Block Mod (Full ssODN)', 1955)]) [(0, 4461), (-1, 22), (-2, 1)]  
TCACCAAAGTTGTTTCTCTCGCTTCCTCCTTCCCTCTCCCCCTTCCCCCCTCTCTTTAGATGGAAGTGAT  
TGTTGGGGACTTTGGGATCGTCGTGGTACCCAGGGATGCAGCGGACACAGACCGGATCATGAATCACTCC  
TCCATACTCCGCAAGTACAAAGTGAGTCCTCCA , 2003  
TCACCAAAGTTGTTTCTCTCGCTTCCTCCTTCCCTCTCCCCCTTCCCCCCTCTCTTTAGATGGAAGTGAT  
TGTTGGGGACTTTGGGATCGTCGTGGTACCCCGTGATGCAGCGGACACAGACCGGATCATGAATCACTCC  
TCCATACTCCGCAAGTACAAAGTGAGTCCTCCA , 1933  
TCACCAAAGTTGTTTCTCTCGCTTCCTCCTTCCCTCTCCCCCTTCCCCCCTCTCTTTAGATGGAAGTGAT  
TGTTGGGGACTGTGGGATCGTCGTGGTACCCAGGGATGCAGCGGACACAGACCGGATCATGAATCACTCC  
TCCATACTCCGCAAGTACAAAGTGAGTCCTCCA , 11  
TCACCAAAGTTGTTTCTCTCGCTTCCTCCTTCCCTCTCCCCCTTCCCCCCTCTCTTTAGATGGAAGTGAT  
TGTTGGGGACTTTGGGATCGTCGTGGTACCCCGTGATGCAGCGGACACAGACCGGATCATGAATCGCTCC  
TCCATACTCCGCAAGTACAAAGTGAGTCCTCCA , 10  
TCACCAAAGTTGTTTCTCTCGCTTCCTCCTTCCCTCTCCCCCTTCCCCCCTCTCTTTAGATGGAAGTGAT  
TGTTGGGGACTTTGGGATCGTCGTGGTACCCAGGGATGCAGCGGACACAGACCGGATCATGAATCACTCC  
TCCATACTCCGCAAGTACAAAGTGAGTCCTCCA , 10  
TCACCAAAGTTGTTTCTCTCGCTTCCTCCTTCCCTCTCCCCCTTCCCCCCTCTCTTTAGATGGAAGTGAT  
TGTTGGGGACTTTGGGATCGTCGTGGTACCCAGGGATGCAGCGGACACAGACCGGATCATGAATCACTCC  
TCCATACTCCGCAAGTACAAAGTGAGTCCTCCA , 8  
TCACCAAAGTTGTTTCTCTCGCTTCCTCCTTCCCTCTCCCCCTTCCCCCCTCTCTTTAGATGGAAGTGAT  
TGTTGGGGACTGTGGGATCGTCGTGGTACCCCGTGATGCAGCGGACACAGACCGGATCATGAATCACTCC

TCCATACTCCGCAAGTACAAAGTGAGTCCTCCA , 7  
TCACCAAAGTTGTTTCTCTCGCTTCCTCCTTCCCTCTCCCCCTTCCCCCCTCTCTTTAGATGGAAGTGAT  
TGTTGGGGACTTTGGGATCGTCGTGGTACCCCGTGATGCAGCGGACACAGACCGGATCATGAATCACTCC  
TCCATACTCCGCAAGTACAAAGTGAGTCCTCCA , 6  
TCACCAAAGTTGTTTCTCTCGCTTCCTCCTTCCCTCTCCCCCTTCCCCCCTCTCTTTAGATGGAAGTGAT  
TGTTGGGGACTTTGGGATCGTCGTGGTACCCAGGGATGCAGCGGACACAGACCGGATCATGAATCACTCC  
TCCATACTCCGCAAGTACAAAGTGAGTCCTCCA , 4  
TCACCAAAGTTGTTTCTCTCGCTTCCTCCTTCCCTCTCCCCCTTCCCCCCTCTCTTTAGATGGAAGTGAT  
TGTTGGGGACTTTGGGATCGTCGTGGTACCCCGTGATGCAGCGGACACAGACCGATCATGAATCACTCC  
TCCATACTCCGCAAGTACAAAGTGAGTCCTCCA , 4  
TCACCAAAGTTGTTTCTCTCGCTTCCTCCTTCCCTCTCCCCCTTCCCCCCTCTCTTTAGATGGAAGTGAT  
TGTTGGGGACTTTGGGATCGTCGTGGTACCCAGGGATGCAGCGGACACAGACCGGATCATGAATCACTCC  
TCCATACTCCGCAAGTACAAAGTGAGTCCTCCA , 4  
TCACCAAAGTTGTTTCTCTCGCTTCCTCCTTCCCTCTCCCCCTTCCCCCCTCTCTTTAGATGGAAGTGAT  
TGTTGGGGACTTTGGGATCGTCGTGGTACCCAGGGATGCAGCGGACACAGACCGGATCATGAATCGCTCC  
TCCATACTCCGCAAGTACAAAGTGAGTCCTCCA , 4

GEIC-Plate01-E07 TOTAL:4182 OrderedDict([('WT\_sp1', 4122), ('R232Q', 0), ('Silent Block Mod', 1), ('R232Q (Full ssODN)', 0), ('Silent Block Mod (Full ssODN)', 1)]) [(0, 4167), (-1, 14), (1, 1)]

TCACCAAAGTTGTTTCTCTCGCTTCCTCCTTCCCTCTCCCCCTTCCCCCCTCTCTTTAGATGGAAGTGAT  
TGTTGGGGACTTTGGGATCGTCGTGGTACCCAGGGATGCAGCGGACACAGACCGGATCATGAATCACTCC  
TCCATACTCCGCAAGTACAAAGTGAGTCCTCCA , 3715  
TCACCAAAGTTGTTTCTCTCGCTTCCTCCTTCCCTCTCCCCCTTCCCCCCTCTCTTTAGATGGAAGTGAT  
TGTTGGGGACTTTGGGATCGTCGTGGTACCCAGGGATGCAGCGGACACAGACCGGATCATGAATCACTCC  
TCCATACTCCGCAAGTACAAAGTGAGTCCTCCA , 28  
TCACCAAAGTTGTTTCTCTCGCTTCCTCCTTCCCTCTCCCCCTTCCCCCCTCTCTTTAGATGGAAGTGAT  
TGTTGGGGACTTTGGGATCGTCGTGGTACCCAGGGATGCAGCGGACACAGACCGGATCATGAATCACTCC  
TCCATACTCCGCAAGTACAAAGTGAGTCCTCCA , 10  
TCACCAAAGTTGTTTCTCTCGCTTCCTCCTTCCCTCTCCCCCTTCCCCCCTCTCTTTAGATGGAAGTGAT  
TGTTGGGGACTTTGGGATCGTCGTGGTACCCAGGGATGCAGCGGACACAGACCGGATCATGAATCACTCC  
TCCATACTCCGCAAGTACAAAGTGAGTCCTCCA , 9  
TCACCAAAGTTGTTTCTCTCGCTTCCTCCTTCCCTCTCCCCCTTCCCCCCTCTCTTTAGATGGAAGTGAT  
TGTTGGGGACTTTGGGATCGTCGTGGTACCCAGGGATGCAGCGGACACAGACCGGATCATGAATCACTCC  
TCCATACTCCGCAAGTACAAAGTGAGTCCTCCA , 9  
TCACCAAAGTTGTTTCTCTCGCTTCCTCCTTCCCTCTCCCCCTTCCCCCCTCTCTTTAGATGGAAGTGAT  
TGTTGGGGACTTTGGGATCGTCGTGGTACCCAGGGATGCAGCGGACACAGACCGGATCATGAATCACTCC  
TCCATACTCCGCAAGTACAAAGTGAGTCCTCCA , 8  
TCACCAAAGTTGTTTCTCTCGCTTCCTCCTTCCCTCTCCCCCTTCCCCCCTCTCTTTAGATGGAAGTGAT  
TGTTGGGGACTTTGGGATCGTCGTGGTACCCAGGGATGCAGCGGACACAGACCGGATCATGAATCACTCC  
TCCATACTCCGCAAGTACAAAGTGAGTCCTCCA , 7  
TCACCAAAGTTGTTTCTCTCGCTTCCTCCTTCCCTCTCCCCCTTCCCCCCTCTCTTTAGATGGAAGTGAT  
TGTTGGGGACTTTGGGATCGTCGTGGTACCCAGGGATGCAGCGGACACAGACCGATCATGAATCACTCC  
TCCATACTCCGCAAGTACAAAGTGAGTCCTCCA , 7  
TCACCAAAGTTGTTTCTCTCGCTTCCTCCTTCCCTCTCCCCCTTCCCCCCTCTCTTTAGATGGAAGTGAT  
TGTTGGGGACTTTGGGATCGTCGTGGTACCCAGGGATGCAGCGGACACAGACCGGATCATGAATCACTCC

GCCATACTCCGCAAGTACAAAGTGAGTCCTCCA , 5  
TCACCAAAGTTGTTTCTCTCGCTTCCTCCTTCCCTCTCCCCCTTCCCCCTTCTCTTTAGATGGAAGTGAT  
TGTTGGGGACTTTGGGATCGTCGTGGTACCCAGGGATGCAGCGGACACAGACCGGATCATGAATCACTCC  
TCCATACTCCGCAAGTACAAAGTGAGTCCTCCA , 5  
TCACCAAAGTTGTTTCTCTCGCTTCCTCCTTCCCTCTCCCCCTTCCCCCTTCTCTTTAGATGGAAGTGAT  
TGTTGGGGACTTTGTGATCGTCGTGGTACCCAGGGATGCAGCGGACACAGACCGGATCATGAATCACTCC  
TCCATACTCCGCAAGTACAAAGTGAGTCCTCCA , 5

GEIC-Plate01-E08 TOTAL:3724 OrderedDict([('WT\_sp1', 3664), ('R232Q', 6), ('Silent Block Mod', 0), ('R232Q (Full ssODN)', 5), ('Silent Block Mod (Full ssODN)', 0)]) [(0, 3708), (-1, 13), (1, 3)]  
TCACCAAAGTTGTTTCTCTCGCTTCCTCCTTCCCTCTCCCCCTTCCCCCTTCTCTTTAGATGGAAGTGAT  
TGTTGGGGACTTTGGGATCGTCGTGGTACCCAGGGATGCAGCGGACACAGACCGGATCATGAATCACTCC  
TCCATACTCCGCAAGTACAAAGTGAGTCCTCCA , 3274  
TCACCAAAGTTGTTTCTCTCGCTTCCTCCTTCCCTCTCCCCCTTCCCCCTTCTCTTTAGATGGAAGTGAT  
TGTTGGGGACTTTGGGATCGTCGTGGTACCCAGGGATGCAGCGGACACAGACCGGATCATGAATCACTCC  
TCCATACTCCGCAAGTACAAAGTGAGTCCTCCA , 20  
TCACCAAAGTTGTTTCTCTCGCTTCCTCCTTCCCTCTCCCCCTTCCCCCTTCTCTTTAGATGGAAGTGAT  
TGTTGGGGACTGTGGGATCGTCGTGGTACCCAGGGATGCAGCGGACACAGACCGGATCATGAATCACTCC  
TCCATACTCCGCAAGTACAAAGTGAGTCCTCCA , 14  
TCACCAAAGTTGTTTCTCTCGCTTCCTCCTTCCCTCTCCCCCTTCCCCCTTCTCTTTAGATGGAAGTGAT  
TGTTGGGGACTTTGGGATCGTCGTGGTACCCAGGGATGCAGCGGACACAGACCGGATCATGAATCGCTCC  
TCCATACTCCGCAAGTACAAAGTGAGTCCTCCA , 12  
TCACCAAAGTTGTTTCTCTCGCTTCCTCCTTCCCTCTCCCCCTTCCCCCTTCTCTTTAGATGGAAGTGAT  
TGTTGGGGACTTTGGGATCGTCGTGGTACCCAGGGATGCAGCGGACACCGACCGGATCATGAATCACTCC  
TCCATACTCCGCAAGTACAAAGTGAGTCCTCCA , 8  
TCACCAAAGTTGTTTCTCTCGCTTCCTCCTTCCCTCTCCCCCTTCCCCCTTCTCTTTAGATGGAAGTGAT  
TGTTGGGGACTTTGGGATCGTCGTGGTACCCAGGGATGCAGCGGACACAGACCGGATCATGAATCACTCC  
TCCATGCTCCGCAAGTACAAAGTGAGTCCTCCA , 6  
TCACCAAAGTTGTTTCTCTCGCTTCCTCCTTCCCTCTCCCCCTTCCCCCTTCTCTTTAGATGGAAGTGATT  
GTTGGGGACTTTGGGATCGTCGTGGTACCCAGGGATGCAGCGGACACAGACCGGATCATGAATCACTCCT  
CCATACTCCGCAAGTACAAAGTGAGTCCTCCA , 6  
TCACCAAAGTTGTTTCTCTCGCTTCCTCCTTCCCTCTCCCCCTTCCCCCTTCTCTTTAGATGGAAGTGAT  
TGTTGGGGACTTTGGGATCGTCGTGGTACCCAGGGATGCAGCGGACACAGACCGGATCATGAATCACTCC  
TCCATACTCCGCAAGTACAAAGTGAGTCCTCCA , 6  
TCACCAAAGTTGTTTCTCTCGCTTCCTCCTTCCCTCTCCCCCTTCCCCCTTCTCTTTAGATGGAAGTGAT  
TGTTGGGGACTTTGGGATCGTCGTGGTACCCAGGGATGCAGCAGACACAGACCGGATCATGAATCACTCC  
TCCATACTCCGCAAGTACAAAGTGAGTCCTCCA , 6  
TCACCAAAGTTGTTTCTCTCGCTTCCTCCTTCCCTCTCCCCCTTCCCCCTTCTCTTTAGATGGAAGTGAT  
TGTTGGGGACTTTGGGATCGTCGTGGTACCCAAAGATGCAGCGGACACAGACCGGATCATGAATCACTCC  
TCCATACTCCGCAAGTACAAAGTGAGTCCTCCA , 5  
TCACCAAAGTTGTTTCTCTCGCTTCCTCCTTCCCTCTCCCCCTTCCCCCTTCTCTTTAGATGGAAGTGAT  
TGTTGGGGACTTTGGGATCGTCGTGGTACCCAGGGATGCAGCGGACACAGGCCGGATCATGAATCACTCC  
TCCATACTCCGCAAGTACAAAGTGAGTCCTCCA , 4  
TCACCAAAGTTGTTTCTCTCGCTTCCTCCTTCCCTCTCCCCCTTCCCCCTTCTCTTTAGATGGAAGTGAT  
TGTTGGGGACTCTGGGATCGTCGTGGTACCCAGGGATGCAGCGGACACAGACCGGATCATGAATCACTCC  
TCCATACTCCGCAAGTACAAAGTGAGTCCTCCA , 4

GEIC-Plate01-F01 TOTAL:3361 OrderedDict([('WT\_sp1', 1659), ('R232Q', 1620), ('Silent Block Mod', 0), ('R232Q (Full ssODN)', 1476), ('Silent Block Mod (Full ssODN)', 0)]) [(0, 3347), (-1, 12), (1, 1), (-2, 1)]

TCACCAAAGTTGTTTCTCTCGCTTCCTCCTTCCCTCTCCCCCTTCCCCCCTCTCTTTAGATGGAAGTGAT  
TGTTGGGGACTTTGGGATCGTCGTGGTACCCAGGGATGCAGCGGACACAGACCGGATCATGAATCACTCC  
TCCATACTCCGCAAGTACAAAGTGAGTCCTCCA , 1474

TCACCAAAGTTGTTTCTCTCGCTTCCTCCTTCCCTCTCCCCCTTCCCCCCTCTCTTTAGATGGAAGTGAT  
TGTTGGGGACTTTGGGATCGTCGTGGTACCCCAAGATGCAGCGGACACAGACCGGATCATGAATCACTCC  
TCCATACTCCGCAAGTACAAAGTGAGTCCTCCA , 1460

TCACCAAAGTTGTTTCTCTCGCTTCCTCCTTCCCTCTCCCCCTTCCCCCCTCTCTTTAGATGGAAGTGAT  
TGTTGGGGACTTTGGGATCGTCGTGGTACCCCAAGATGCAGCGGACACAGACCGGATCATGAATCGCTCC  
TCCATACTCCGCAAGTACAAAGTGAGTCCTCCA , 7

TCACCAAAGTTGTTTCTCTCGCTTCCTCCTTCCCTCTCCCCCTTCCCCCCTCTCTTTAGATGGAAGTGAT  
TGTTGGGGACTTTGGGATCGTCGTGGTACCCAGGGATGCAGCGGACACAGACCGGATCATGAATCACTCC  
TCCATACTCCGCAAGTACAAAGTGAGTCCTCCA , 6

TCACCAAAGTTGTTTCTCTCGCTTCCTCCTTCCCTCTCCCCCTTCCCCCCTCTCTTTAGATGGAAGTGAT  
TGTTGGGGACTTTGGGATCGTCGTGGTACCCAGGGATGCAGCGGACACAGACCGGATCATGAATCGCTCC  
TCCATACTCCGCAAGTACAAAGTGAGTCCTCCA , 5

TCACCAAAGTTGTTTCTCTCGCTTCCTCCTTCCCTCTCCCCCTTCCCCCCTCTCTTTAGATGGAAGTGAT  
TGTTGGGGACTTTGGGATCGTCGTGGTACCCAGGGATGCAGCGGACACAGACCGGATCATGAATCACTCC  
TCCATACTCCGCAAGTACAAAGTGAGTCCTCCA , 5

TCACCAAAGTTGTTTCTCTCGCTTCCTCCTTCCCTCTCCCCCTTCCCCCCTCTCTTTAGATGGAAGTGAT  
TGTTGGGGACTTTGGGATCGTCGTGGTACCCAGGGATGCAGCGGACACAGACCGGATCATGAATCACTCC  
TCCATACTCCGCAAGTACAAAGTGAGTCCTCCA , 5

TCACCAAAGTTGTTTCTCTCGCTTCCTCCTTCCCTCTCCCCCTTCCCCCCTCTCTTTAGATGGAAGTGAT  
TGTTGGGGACTTTGGGATCGTCGTGGTACCCCAAGATGCAGCGGACACAGACCGGATCATGAATCACTCC  
TCCATACTCCGCAAGTACAAAGTGAGTCCTCCA , 5

TCACCAAAGTTGTTTCTCTCGCTTCCTCCTTCCCTCTCCCCCTTCCCCCCTCTCTTTAGATGGAAGTGAT  
TGTTGGGGACTTTGGGATCGTCGTGGTACCTCAAGATGCAGCGGACACAGACCGGATCATGAATCACTCC  
TCCATACTCCGCAAGTACAAAGTGAGTCCTCCA , 5

TCACCAAAGTTGTTTCTCTCGCTTCCTCCTTCCCTCTCCCCCTTCCCCCCTCTCTTTAGATGGAAGTGAT  
TGTTGGGGACTATGGGATCGTCGTGGTACCCAGGGATGCAGCGGACACAGACCGGATCATGAATCACTCC  
TCCATACTCCGCAAGTACAAAGTGAGTCCTCCA , 4

TCACCAAAGTTGTTTCTCTCGCTTCCTCCTTCCCTCTCCCCCTTCCCCCCTCTCTTTAGATGGAAGTGAG  
TGTTGGGGACTTTGGGATCGTCGTGGTACCCCAAGATGCAGCGGACACAGACCGGATCATGAATCACTCC  
TCCATACTCCGCAAGTACAAAGTGAGTCCTCCA , 4

TCACCAAAGTTGTTTCTCTCGCTTCCTCCTTCCCTCTCCCCCTTCCCCCCTCTCTTTAGATGGAAGTGAT  
TGTTGGGGACTTTGGGATCGTCGTGGTACCCCAAGATGCAGCGGACACAGACCGATCATGAATCACTCC  
TCCATACTCCGCAAGTACAAAGTGAGTCCTCCA , 4

GEIC-Plate01-F02 TOTAL:2679 OrderedDict([('WT\_sp1', 1293), ('R232Q', 0), ('Silent Block Mod', 1319), ('R232Q (Full ssODN)', 0), ('Silent Block Mod (Full ssODN)', 1177)]) [(0, 2671), (-1, 6), (2, 1), (-2, 1)]

TCACCAAAGTTGTTTCTCTCGCTTCCTCCTTCCCTCTCCCCCTTCCCCCCTCTCTTTAGATGGAAGTGAT  
TGTTGGGGACTTTGGGATCGTCGTGGTACCCCGTGATGCAGCGGACACAGACCGGATCATGAATCACTCC  
TCCATACTCCGCAAGTACAAAGTGAGTCCTCCA , 1161

TCACCAAAGTTGTTTCTCTCGCTTCCTCCTTCCCTCTCCCCCTTCCCCCCTCTCTTTAGATGGAAGTGAT

TGTTGGGGACTTTGGGATCGTCGTGGTACCCAGGGATGCAGCGGACACAGACCGGATCATGAATCACTCC  
TCCATACTCCGCAAGTACAAAGTGAGTCCTCCA , 1148  
TCACCAAAGTTGTTTCTCTCGTTCCCTCCTTCCCTCTCCCCCTTCCCCCCTCTCTTTAGATGGAAGTGAT  
TGTTGGGGACTTTGGGATCGTCGTGGTACCCCGTGATGCAGCGGACACAGACCGGATCATGAATCACTCC  
TCCATACTCCGCAAGTACAAAGTGAGTCCTCCA , 10  
TCACCAAAGTTGTTTCTCTCGTTCCCTCCTTCCCTCTCCCCCTTCCCCCCTCTCTTTAGATGGAAGTGAT  
TGTTGGGGACTTTGGGATCGTCGTGGTACCCAGGGATGCAGCGGACACAGACCGGATCATGAATCACTCC  
TCCATACTCCGCAAGTACAAAGTGAGTCCTCCA , 9  
TCACCAAAGTTGTTTCTCTCGTTCCCTCCTTCCCTCTCCCCCTTCCCCCCTCTCTTTAGATGGAAGTGAT  
TGTTGGGGACTTTGGGATCGTCGTGGTACCCCGTGATGCAGCGGACACAGACCGGATCATGAATCACTCC  
TCCATACTCCGCAAGTACAAAGTGAGTCCTCCA , 7  
TCACCAAAGTTGTTTCTCTCGTTCCCTCCTTCCCTCTCCCCCTTCCCCCCTCTCTTTAGATGGAAGTGAT  
TGTTGGGGACTTTGGGATCGTCGTGGTACCCAGGGATGCAGCGGACACAGACCGGATCATGAATCACTCC  
TCCATACTCCGCAAGTACAAAGTGAGTCCTCCA , 6  
TCACCAAAGTTGTTTCTCTCGTTCCCTCCTTCCCTCTCCCCCTTCCCCCCTCTCTTTAGATGGAAGTGAT  
TGTTGGGGACTTTGGGATCGTCGTGGTACCCCGTGATGCAGCGGACACAGACCGGATCATGAATCACTCC  
GCCATACTCCGCAAGTACAAAGTGAGTCCTCCA , 6  
TCACCAAAGTTGTTTCTCTCGTTCCCTCCTTCCCTCTCCCCCTTCCCCCCTCTCTTTAGATGGAAGTGAT  
TGTTGGGGACTTTGGGATCGTCGTGGTACCCCGTGATGCAGCGGACACAGACCGGATCATGAATCGCTCC  
TCCATACTCCGCAAGTACAAAGTGAGTCCTCCA , 4  
TCACCAAAGTTGTTTCTCTCGTTCCCTCCTTCCCTCTCCCCCTTCCCCCCTCTCTTTAGATGGAAGTGAT  
TGTTGGGGACTTTGGGATCGTCGTGGTACCCAGGGATGCAGCGGACACAGACCGGATCATGAATCACTCC  
GCCATACTCCGCAAGTACAAAGTGAGTCCTCCA , 4  
TCACCAAAGTTGTTTCTCTCGTTCCCTCCTTCCCTCTCCCCCTTCCCCCCTCTCTTTAGATGGAAGTGAT  
TGTTGGGGACTTTGGGATCGTCGTGGTACCCCGTGATGCAGCGGACACAGACCGGATCATGAATCACTCC  
TCCATACTCCGCAAGTACAAAGTGAGTCCTCCA , 3  
TCACCAAAGTTGTTTCTCTCGTTCCCTCCTTCCCTCTCCCCCTTCCCCCCTCTCTTTAGATGGAAGTGAT  
TGTTGGGGACTTTGGGATCGTCGTGGTACCCAGGGATGCAGCGGACACAGACCGGATCATGAATCACTCC  
TCCATGCTCCGCAAGTACAAAGTGAGTCCTCCA , 3  
TCACCAAAGTTGTTTCTCTCGTTCCCTCCTTCCCTCTCCCCCTTCCCCCCTCTCTTTAGATGGAAGTGAT  
TGTTGGGGACTTTGGGATCGTCGTGGTACCCCGTGATGCAGCGGATACAGACCGGATCATGAATCACTCC  
TCCATACTCCGCAAGTACAAAGTGAGTCCTCCA , 3

GEIC-Plate01-F03 TOTAL:2861 OrderedDict([('WT\_sp1', 2813), ('R232Q',  
0), ('Silent Block Mod', 0), ('R232Q (Full ssODN)', 0), ('Silent Block  
Mod (Full ssODN)', 0)]) [(0, 2845), (-1, 14), (1, 1), (2, 1)]  
TCACCAAAGTTGTTTCTCTCGTTCCCTCCTTCCCTCTCCCCCTTCCCCCCTCTCTTTAGATGGAAGTGAT  
TGTTGGGGACTTTGGGATCGTCGTGGTACCCAGGGATGCAGCGGACACAGACCGGATCATGAATCACTCC  
TCCATACTCCGCAAGTACAAAGTGAGTCCTCCA , 2482  
TCACCAAAGTTGTTTCTCTCGTTCCCTCCTTCCCTCTCCCCCTTCCCCCCTCTCTTTAGATGGAAGTGAT  
TGTTGGGGACTTTGGGATCGTCGTGGTACCCAGGGATGCAGCGGACACAGACCGGATCATGAATCACTCC  
TCCATACTCCGCAAGTACAAAGTGAGTCCTCCA , 16  
TCACCAAAGTTGTTTCTCTCGTTCCCTCCTTCCCTCTCCCCCTTCCCCCCTCTCTTTAGATGGAAGTGAT  
TGTTGGGGACTTTGGGATCGTCGTGGTACCCAGGGATGCAGCGGACACAGACCGGATCATGAATCACTCC  
TCCATACTCCGCAAGTACAAAGTGAGTCCTCCA , 14  
TCACCAAAGTTGTTTCTCTCGTTCCCTCCTTCCCTCTCCCCCTTCCCCCCTCTCTTTAGATGGAAGTGAT  
TGTTGGGGACTTTGGGATCGTCGTGGTACCCAGGGATGCAGCGGACACAGACCGGATCATGAATCGCTCC  
TCCATACTCCGCAAGTACAAAGTGAGTCCTCCA , 10  
TCACCAAAGTTGTTTCTCTCGTTCCCTCCTTCCCTCTCCCCCTTCCCCCCTCTCTTTAGATGGAAGTGAT

TGTTGGGGACTTTGGGATCGTCGTGGTACCCAGGGATGCAGCGGACACAGACCGGATCATGAATCACTCC  
TCCATGCTCCGCAAGTACAAAGTGAGTCCTCCA , 7  
TCACCAAAGTTGTTTCTCTCGCTTCCTCCTTCCCTCTCCCCCTTCCCCCCTCTCTTTAGATGGAAGTGAT  
TGTTGGGGACTTTGGGATCGTCGTGGTACCCAGGGATGCAGCGGACACAGACCGGATCATGAATCACTCC  
TCCATACTCCGCAAGTACAAAGTGAGTCCTCCA , 6  
TCACCAAAGTTGTTTCTCTCGCTTCCTCCTTCCCTCTCCCCCTTCCCCCCTCTCTTTAGATGGAAGTGAT  
TGTTGGGGACTTTGGGATCGTCGTGGTACCCAGGGATGCAGCGGACACAGACCGGATCATGAATCACGCC  
TCCATACTCCGCAAGTACAAAGTGAGTCCTCCA , 5  
TCACCAAAGTTGTTTCTCTCGCTTCCTCCTTCCCTCTCCCCCTTCCCCCCTCTCTTTAGATGGAAGTGAT  
TGTTGGGGACTTTGGGATCGTCGTGGTACCCAGGGATGCAGCGGACACAGACCGGATCATGAATCACTCC  
TCCATACGCCGCAAGTACAAAGTGAGTCCTCCA , 4  
TCACCAAAGTTGTTTCTCTCGCTTCCTCCTTCCCTCTCCCCCTTCCCCCCTCTCCTTAGATGGAAGTGAT  
TGTTGGGGACTTTGGGATCGTCGTGGTACCCAGGGATGCAGCGGACACAGACCGGATCATGAATCACTCC  
TCCATACTCCGCAAGTACAAAGTGAGTCCTCCA , 4  
TCACCAAAGTTGTTTCTCTCGCTTCCTCCTTCCCTCTCCCCCTTCCCCCCTCTCTTTAGATGGAAGTGAT  
TGTTGGGGACTTTGGGATCGTCGTGGTACCCAGGGATGCAGCGGACACAGACCGGATCATGAATCACTCC  
TCCATACTCCGCAAGTACAAAGTGAGTCCTCCA , 4  
TCACCAAAGTTGTTTCTCTCGCTTCCTCCTTCCCTCTCCCCCTTCCCCCCTCTCTTTAGATGGAAGTGAT  
TGTTGGGGACTTTGGGATCGTCGTGGTACCCAGGGATGCAGCGGACACAGACCGGATCATGAATCACTCC  
TCCATACTCCGCAGGTACAAAGTGAGTCCTCCA , 3

GEIC-Plate01-F04 TOTAL:3528 OrderedDict([('WT\_sp1', 3452), ('R232Q',  
0), ('Silent Block Mod', 0), ('R232Q (Full ssODN)', 0), ('Silent Block  
Mod (Full ssODN)', 0)]) [(0, 3513), (-1, 14), (1, 1)]  
TCACCAAAGTTGTTTCTCTCGCTTCCTCCTTCCCTCTCCCCCTTCCCCCCTCTCTTTAGATGGAAGTGAT  
TGTTGGGGACTTTGGGATCGTCGTGGTACCCAGGGATGCAGCGGACACAGACCGGATCATGAATCACTCC  
TCCATACTCCGCAAGTACAAAGTGAGTCCTCCA , 3062  
TCACCAAAGTTGTTTCTCTCGCTTCCTCCTTCCCTCTCCCCCTTCCCCCCTCTCTTTAGATGGAAGTGAT  
TGTTGGGGACTTTGGGATCGTCGTGGTACCCAGGGATGCAGCGGACACAGACCGGATCATGAATCACTCC  
TCCATACTCCGCAAGTACAAAGTGAGTCCTCCA , 18  
TCACCAAAGTTGTTTCTCTCGCTTCCTCCTTCCCTCTCCCCCTTCCCCCCTCTCTTTAGATGGAAGTGAT  
TGTTGGGGACTTTGGGATCGTCGTGGTACCCAGGGATGCAGCGGACACAGACCGGATCATGAATCACTCC  
TCCATACTCCGCAAGTACAAAGTGAGTCCTCCA , 15  
TCACCAAAGTTGTTTCTCTCGCTTCCTCCTTCCCTCTCCCCCTTCCCCCCTCTCTTTAGATGGAAGTGAT  
TGTTGGGGACTGTGGGATCGTCGTGGTACCCAGGGATGCAGCGGACACAGACCGGATCATGAATCACTCC  
TCCATACTCCGCAAGTACAAAGTGAGTCCTCCA , 12  
TCACCAAAGTTGTTTCTCTCGCTTCCTCCTTCCCTCTCCCCCTTCCCCCCTCTCTTTAGATGGAAGTGAT  
TGTTGGGGACTTTGGGATCGTCGTGGTACCCAGGGATGCAGCGGACACAGACCGGATCATGAATCGCTCC  
TCCATACTCCGCAAGTACAAAGTGAGTCCTCCA , 10  
TCACCAAAGTTGTTTCTCTCGCTTCCTCCTTCCCTCTCCCCCTTCCCCCCTCTCTTTAGATGGAAGTGAT  
TGTTGGGGACTTTGGGATCGTCGTGGTACCCAGGGATGCAGCGGACACAGACCGGATCATGAATCACTCC  
TCCATACTCCGCAAGTACCAAGTGAGTCCTCCA , 9  
TCACCAAAGTTGTTTCTCTCGCTTCCTCCTTCCCTCTCCCCCTTCCCCCCTCTCTTTAGATGGAAGTGAT  
TGTTGGGGACTTTGGGATCGTCGTGGTACCCAGGGATGCAGCGGACACAGACCGGATCATGAATCACTCC  
TCCATACTCCGCAAGTACAAAGTGAGTCCTCCA , 7  
TCACCAAAGTTGTTTCTCTCGCTTCCTCCTTCCCTCTCCCCCTTCCCCCCTCCCTTTAGATGGAAGTGAT

TGTTGGGGACTTTGGGATCGTCGTGGTACCCAGGGATGCAGCGGACACAGACCGGATCATGAATCACTCC  
TCCATACTCCGCAAGTACAAAGTGAGTCCTCCA , 6  
TCACCAAAGTTGTTTCTCTCGTTCCCTCCTTCCCTCTCCCCCTTCCCCCCTCTCTTTAGATGGAAGTGAT  
TGTTGGGGACTTTGGGATCGTCGTGGTACCCAGGGATGCAGCGGACACAGACCGGATCATGAATCACTCC  
GCCATACTCCGCAAGTACAAAGTGAGTCCTCCA , 6  
TCACCAAAGTTGTTTCTCTCGTTCCCTCCTTCCCTCTCCCCCTTCCCCCCTCTCTTTAGATGGAAGTGAT  
TGTTGGGGACTTTGGGATCGTCGTGGTACCCAGGGATGCAGCGGACACAGACCGGATCATGAATCACTCC  
TCCATACGCCGCAAGTACAAAGTGAGTCCTCCA , 5  
TCACCAAAGTTGTTTCTCTCGTTCCCTCCTTCCCTCTCCCCCTTCCCCCCTCTCTTTAGATGGAAGTGAT  
TGTTGGGGACTTTGGGATCGTCGTGGTCCCAGGGATGCAGCGGACACAGACCGGATCATGAATCACTCC  
TCCATACTCCGCAAGTACAAAGTGAGTCCTCCA , 5  
TCACCAAAGTTGTTTCTCTCGTTCCCTCCTTCCCTCTCCCCCTTCCCCCCTCTCTTTAGATGGAAGTGAT  
TGTTGGGGACTTTGGGATCGTCGTGGTACCCAGGGATGCAGCGGACACAGACCGGATCATGAATCACTCC  
TCCATACTCCGCAAGTACAAAGTGAGTCCTCCA , 5

GEIC-Plate01-F05 TOTAL:3841 OrderedDict([('WT\_sp1', 1903), ('R232Q', 1861), ('Silent Block Mod', 1), ('R232Q (Full ssODN)', 1688), ('Silent Block Mod (Full ssODN)', 1)]) [(0, 3827), (-1, 14)]  
TCACCAAAGTTGTTTCTCTCGTTCCCTCCTTCCCTCTCCCCCTTCCCCCCTCTCTTTAGATGGAAGTGAT  
TGTTGGGGACTTTGGGATCGTCGTGGTACCCAGGGATGCAGCGGACACAGACCGGATCATGAATCACTCC  
TCCATACTCCGCAAGTACAAAGTGAGTCCTCCA , 1694  
TCACCAAAGTTGTTTCTCTCGTTCCCTCCTTCCCTCTCCCCCTTCCCCCCTCTCTTTAGATGGAAGTGAT  
TGTTGGGGACTTTGGGATCGTCGTGGTACCCCAAGATGCAGCGGACACAGACCGGATCATGAATCACTCC  
TCCATACTCCGCAAGTACAAAGTGAGTCCTCCA , 1665  
TCACCAAAGTTGTTTCTCTCGTTCCCTCCTTCCCTCTCCCCCTTCCCCCCTCTCTTTAGATGGAAGTGAT  
TGTTGGGGACTTTGGGATCGTCGTGGTACCCAGGGATGCAGCGGACACAGACCGGATCATGAATCACTCC  
TCCATACTCCGCAAGTACAAAGTGAGTCCTCCA , 13  
TCACCAAAGTTGTTTCTCTCGTTCCCTCCTTCCCTCTCCCCCTTCCCCCCTCTCTTTAGATGGAAGTGAT  
TGTTGGGGACTGTGGGATCGTCGTGGTACCCAGGGATGCAGCGGACACAGACCGGATCATGAATCACTCC  
TCCATACTCCGCAAGTACAAAGTGAGTCCTCCA , 11  
TCACCAAAGTTGTTTCTCTCGTTCCCTCCTTCCCTCTCCCCCTTCCCCCCTCTCTTTAGATGGAAGTGAT  
TGTTGGGGACTGTGGGATCGTCGTGGTACCCCAAGATGCAGCGGACACAGACCGGATCATGAATCACTCC  
TCCATACTCCGCAAGTACAAAGTGAGTCCTCCA , 7  
TCACCAAAGTTGTTTCTCTCGTTCCCTCCTTCCCTCTCCCCCTTCCCCCCTCTCTTTAGATGGAAGTGAT  
TGTTGGGGACTTTGGGATCGTCGTGGTACCCAGGGATGCAGCGGACACAGACCGGATCATGAATCACTCC  
TCCATGCTCCGCAAGTACAAAGTGAGTCCTCCA , 7  
TCACCAAAGTTGTTTCTCTCGTTCCCTCCTTCCCTCTCCCCCTTCCCCCCTCTCTTTAGATGGAAGTGAT  
TGTTGGGGACTTTGGGATCGTCGTGGTACCCAGGGATGCAGCGGACACAGACCGGATCATGAATCACTCC  
TCCATACGCCGCAAGTACAAAGTGAGTCCTCCA , 7  
TCACCAAAGTTGTTTCTCTCGTTCCCTCCTTCCCTCTCCCCCTTCCCCCCTCTCTTTAGATGGAAGTGAT  
TGTTGGGGACTGTGGGATCGTCGTGGTACCCCAAGATGCAGCGGACACAGACCGGATCATGAATCACTCC  
TCCATACTCCGCAAGTACAAAGTGAGTCCTCCA , 7  
TCACCAAAGTTGTTTCTCTCGTTCCCTCCTTCCCTCTCCCCCTTCCCCCCTCTCTTTAGATGGAAGTGAT  
TGTTGGGGACTTTGGGATCGTCGTGGTACCCCAAGATGCAGCGGACACAGACCGGATCATGAATCGCTCC  
TCCATACTCCGCAAGTACAAAGTGAGTCCTCCA , 6  
TCACCAAAGTTGTTTCTCTCGTTCCCTCCTTCCCTCTCCCCCTTCCCCCCTCTCTTTAGATGGAAGTGAT  
TGTTGGGGACTTTGGGATCGTCGTGGTACCCAGGGATGCAGCGGACACAGACCGGATCATGAATCGCTCC  
TCCATACTCCGCAAGTACAAAGTGAGTCCTCCA , 5  
TCACCAAAGTTGTTTCTCTCGTTCCCTCCTTCCCTCTCCCCCTTCCCCCCTCTCTTTAGATGGAAGTGAT

TGTTGGGGACGTTGGGATCGTCGTGGTACCCAGGGATGCAGCGGACACAGACCGGATCATGAATCACTCC  
TCCATACTCCGCAAGTACAAAGTGAGTCCTCCA , 4  
TCACCAAAGTTGTTTCTCTCGCTTCCTCCTTCCCTCTCCCCCTTCCCCCTCTCTTTAGATGGAAGTGAT  
TGTTGGGGACTTTGGGATCGTCGTGGTACCCCAAGATGCAGCGGACACAGACCGGATCATGAATCACTCC  
TCCATACGCCGCAAGTACAAAGTGAGTCCTCCA , 4

GEIC-Plate01-F06 TOTAL:3400 OrderedDict([('WT\_sp1', 1636), ('R232Q',  
0), ('Silent Block Mod', 0), ('R232Q (Full ssODN)', 0), ('Silent Block  
Mod (Full ssODN)', 0)]) [(-1, 1739), (0, 1647), (-2, 14)]  
TCACCAAAGTTGTTTCTCTCGCTTCCTCCTTCCCTCTCCCCCTTCCCCCTCTCTTTAGATGGAAGTGAT  
TGTTGGGGACTTTGGGATCGTCGTGGTCCCAGGGATGCAGCGGACACAGACCGGATCATGAATCACTCCT  
CCATACTCCGCAAGTACAAAGTGAGTCCTCCA , 1553  
TCACCAAAGTTGTTTCTCTCGCTTCCTCCTTCCCTCTCCCCCTTCCCCCTCTCTTTAGATGGAAGTGAT  
TGTTGGGGACTTTGGGATCGTCGTGGTACCCAGGGATGCAGCGGACACAGACCGGATCATGAATCACTCC  
TCCATACTCCGCAAGTACAAAGTGAGTCCTCCA , 1450  
TCACCAAAGTTGTTTCTCTCGCTTCCTCCTTCCCTCTCCCCCTTCCCCCTCTCTTTAGATGGAAGTGAT  
TGTTGGGGACTGTGGGATCGTCGTGGTACCCAGGGATGCAGCGGACACAGACCGGATCATGAATCACTCC  
TCCATACTCCGCAAGTACAAAGTGAGTCCTCCA , 11  
TCACCAAAGTTGTTTCTCTCGCTTCCTCCTTCCCTCTCCCCCTTCCCCCTCTCTTTAGATGGAAGTGAT  
TGTTGGGGACTTTGGGATCGTCGTGGTACCCAGGGATGCAGCGGACACAGACCGGATCATGAATCGCTCC  
TCCATACTCCGCAAGTACAAAGTGAGTCCTCCA , 10  
TCACCAAAGTTGTTTCTCTCGCTTCCTCCTTCCCTCTCCCCCTTCCCCCTCTCTTTAGATGGAAGTGATT  
GTTGGGGACTTTGGGATCGTCGTGGTACCCAGGGATGCAGCGGACACAGACCGGATCATGAATCACTCCT  
CCATACTCCGCAAGTACAAAGTGAGTCCTCCA , 4  
TCACCAAAGTTGTTTCTCTCGCTTCCTCCTTCCCTCTCCCCCTTCCCCCTCTCTTTAGATGGAAGTGAT  
TGTTGGGGACTTTGGGATCGTCGTGGTACCCAGGGATGCAGCGGACACCGACCGGATCATGAATCACTCC  
TCCATACTCCGCAAGTACAAAGTGAGTCCTCCA , 4  
TCACCAAAGTTGTTTCTCTCGCTTCCTCCTTCCCTCTCCCCCTTCCCCCTCTCTTTAGATGGAAGTGAT  
TGTTGGGGACTTTGGGATCGTCGTGGTACCCAGGGATGCAGCGGACACCGACCGGATCATGAATCACTCC  
TCCATACTCCGCAAGTACAAAGTGAGTCCTCCA , 4  
TCACCAAAGTTGTTTCTCTCGCTTCCTCCTTCCCTCTCCCCCTTCCCCCTCTCTTTAGATGGAAGTGAT  
TGTTGGGGACTTTGGGATCGTCGTGGTACCCAGGGATGCAGCGGACACAGACCGGATCATGAATCACTCC  
TCCATACTCCGCAAGTACAAAGTGAGTCCTCCA , 4  
TCACCAAAGTTGTTTCTCTCGCTTCCTCCTTCCCTCTCCCCCTTCCCCCTCTCTTTAGATGGAAGTGAT  
TGTTGGGGACTTTGGGATCGTCGTGGTACCCAGGGATGCAGCGGACACAGACCGGATCATGAATCACTCC  
TCCATACTCCGCAAGTACAAAGTGAGTCCTCCA , 4  
TCACCAAAGTTGTTTCTCTCGCTTCCTCCTTCCCTCTCCCCCTTCCCCCTCTCTTTAGATGGAAGTGAT  
TGTTGGGGACTTTGGGATCGTCGTGGTACCCAGGGATGCAGCGGACACAGACCGGATCATGAATCGCTCCT  
CCATACTCCGCAAGTACAAAGTGAGTCCTCCA , 4  
TCACCAAAGTTGTTTCTCTCGCTTCCTCCTTCCCTCTCCCCCTTCCCCCTCTCTTTAGATGGAAGTGAT  
TGTTGGGGACTTTGGGATCGTCGTGGTACCCAGGGATGCAGCGGACACAGGCCGGATCATGAATCACTCC  
TCCATACTCCGCAAGTACAAAGTGAGTCCTCCA , 3  
TCACCAAAGTTGTTTCTCTCGCTTCCTCCTTCCCTCTCCCCCTTCCCCCTCTCTTTAGATGGAAGTGAT  
TGTTGGGGACTTTGGGATCGTCGTGGTACCCAGGGATGCAGCGGACACCGACCGGATCATGAATCGCTCC  
TCCATACTCCGCAAGTACAAAGTGAGTCCTCCA , 3

GEIC-Plate01-F07 TOTAL:3518 OrderedDict([('WT\_sp1', 3469), ('R232Q',  
0), ('Silent Block Mod', 1), ('R232Q (Full ssODN)', 0), ('Silent Block

Mod (Full ssODN)', 1]]) [(0, 3504), (-1, 13), (1, 1)]  
TCACCAAAGTTGTTTCTCTCGCTTCCTCCTTCCCTCTCCCCCTTCCCCCCTCTCTTTAGATGGAAGTGAT  
TGTTGGGGACTTTGGGATCGTCGTGGTACCCAGGGATGCAGCGGACACAGACCGGATCATGAATCACTCC  
TCCATACTCCGCAAGTACAAAGTGAGTCCTCCA , 3100  
TCACCAAAGTTGTTTCTCTCGCTTCCTCCTTCCCTCTCCCCCTTCCCCCCTCTCTTTAGATGGAAGTGAT  
TGTTGGGGACTTTGGGATCGTCGTGGTACCCAGGGATGCAGCGGACACAGACCGGATCATGAATCACTCC  
TCCATACTCCGCAAGTACAAAGTGAGTCCTCCA , 22  
TCACCAAAGTTGTTTCTCTCGCTTCCTCCTTCCCTCTCCCCCTTCCCCCCTCTCTTTAGATGGAAGTGAT  
TGTTGGGGACTTTGGGATCGTCGTGGTACCCAGGGATGCAGCGGACACAGACCGGATCATGAATCACTCC  
TCCATACTCCGCAAGTACAAAGTGAGTCCTCCA , 15  
TCACCAAAGTTGTTTCTCTCGCTTCCTCCTTCCCTCTCCCCCTTCCCCCCTCTCTTTAGATGGAAGTGAT  
TGTTGGGGACTTTGGGATCGTCGTGGTACCCAGGGATGCAGCGGACACAGACCGGATCATGAATCACTCC  
TCCATACTCCGCAAGTACAAAGTGAGTCCTCCA , 13  
TCACCAAAGTTGTTTCTCTCGCTTCCTCCTTCCCTCTCCCCCTTCCCCCCTCTCTTTAGATGGAAGTGAT  
TGTTGGGGACTTTGGGATCGTCGTGGTACCCAGGGATGCAGCGGACACAGACCGGATCATGAATCGCTCC  
TCCATACTCCGCAAGTACAAAGTGAGTCCTCCA , 11  
TCACCAAAGTTGTTTCTCTCGCTTCCTCCTTCCCTCTCCCCCTTCCCCCCTCTCTTTAGATGGAAGTGAT  
TGTTGGGGACTTTGGGATCGTCGTGGTACCCAGGGATGCAGCGGACACAGACCGGATCATGAATCACTCC  
TCCATGCTCCGCAAGTACAAAGTGAGTCCTCCA , 7  
TCACCAAAGTTGTTTCTCTCGCTTCCTCCTTCCCTCTCCCCCTTCCCCCCTCTCTTTAGATGGAAGTGAT  
TGTTGGGGACTTTGGGATCGTCGTGGTACCCAGGGATGCAGCGGACACAGACCGGATCATGAATCACTCC  
TCCATACTCCGCAAGTACAAAGTGAGTCCTCCA , 6  
TCACCAAAGTTGTTTCTCTCGCTTCCTCCTTCCCTCTCCCCCTTCCCCCCTCTCTTTAGATGGAAGTGAT  
TGTTGGGGACTTTGGGATCGTCGTGGTACCCAGGGATGCAGCGGACACAGACCGGATCATGAATCACTCC  
TCCATACGCCGCAAGTACAAAGTGAGTCCTCCA , 6  
TCACCAAAGTTGTTTCTCTCGCTTCCTCCTTCCCTCTCCCCCTTCCCCCCTCTCTTTAGATGGAAGTGAT  
TGTTGGGGACTTTGGGATCGTCGTGGTACCCAGGGATGCAGCGGACACAGACCGGATCATGAATCACTCC  
TCCATACTCCGCAAGTACCAAGTGAGTCCTCCA , 5  
TCACCAAAGTTGTTTCTCTCGCTTCCTCCTTCCCTCTCCCCCTTCCCCCCTCTCTTTAGATGGAAGTGAT  
TGTTGGGGACTTTGGGATCGTCGTGGTACCCAGGGATGCAGCGGACACAGGCCGGATCATGAATCACTCC  
TCCATACTCCGCAAGTACAAAGTGAGTCCTCCA , 4  
TCACCAAAGTTGTTTCTCTCGCTTCCTCCTTCCCTCTCCCCCTTCCCCCCTCTCTTTAGATGGAAGTGAA  
TGTTGGGGACTTTGGGATCGTCGTGGTACCCAGGGATGCAGCGGACACAGACCGGATCATGAATCACTCC  
TCCATACTCCGCAAGTACAAAGTGAGTCCTCCA , 4  
TCACCAAAGTTGTTTCTCTCGCTTCCTCCTTCCCTCTCCCCCTTCCCCCCTCTCTTTAGATGGAAGTGAT  
TGTTGGGGACTTTGGGATCGTCGTGGTACCCAGGGATGCAGCGGACACAGACCGGATCATGAATCACTCC  
TCCATACTCCGCAAGTACAAAGTGAGTCCTCCA , 4

GEIC-Plate01-F08 TOTAL:2893 OrderedDict([('WT\_sp1', 2838), ('R232Q',  
0), ('Silent Block Mod', 0), ('R232Q (Full ssODN)', 0), ('Silent Block  
Mod (Full ssODN)', 0)]) [(0, 2880), (-1, 13)]  
TCACCAAAGTTGTTTCTCTCGCTTCCTCCTTCCCTCTCCCCCTTCCCCCCTCTCTTTAGATGGAAGTGAT  
TGTTGGGGACTTTGGGATCGTCGTGGTACCCAGGGATGCAGCGGACACAGACCGGATCATGAATCACTCC  
TCCATACTCCGCAAGTACAAAGTGAGTCCTCCA , 2525  
TCACCAAAGTTGTTTCTCTCGCTTCCTCCTTCCCTCTCCCCCTTCCCCCCTCTCTTTAGATGGAAGTGAT  
TGTTGGGGACTTTGGGATCGTCGTGGTACCCAGGGATGCAGCGGACACAGACCGGATCATGAATCACTCC  
TCCATACTCCGCAAGTACAAAGTGAGTCCTCCA , 13  
TCACCAAAGTTGTTTCTCTCGCTTCCTCCTTCCCTCTCCCCCTTCCCCCCTCTCTTTAGATGGAAGTGAT  
TGTTGGGGACTTTGGGATCGTCGTGGTACCCAGGGATGCAGCGGACACAGACCGGATCATGAATCACTCC

TCCATACTCCGCAAGTACAAAGTGAGTCCTCCA , 11  
TCACCAAAGTTGTTTCTCTCGCTTCCTCCTTCCCTCTCCCCCTTCCCCCCTCTCTTTAGATGGAAGTGAT  
TGTTGGGGACTGTGGGATCGTCGTGGTACCCAGGGATGCAGCGGACACAGACCGGATCATGAATCACTCC  
TCCATACTCCGCAAGTACAAAGTGAGTCCTCCA , 10  
TCACCAAAGTTGTTTCTCTCGCTTCCTCCTTCCCTCTCCCCCTTCCCCCCTCTCTTTAGATGGAAGTGAT  
TGTTGGGGACTTTGGGATCGTCGTGGTACCCAGGGATGCAGCGGACACAGACCGGATCATGAATCGCTCC  
TCCATACTCCGCAAGTACAAAGTGAGTCCTCCA , 8  
TCACCAAAGTTGTTTCTCTCGCTTCCTCCTTCCCTCTCCCCCTTCCCCCCTCTCTTTAGATGGAAGTGAT  
TGTTGGGGACTTTGGGATCGTCGTGGTACCCAGGGATGCAGCGGACACAGACCGGATCATGAATCACTCC  
TCCATGCTCCGCAAGTACAAAGTGAGTCCTCCA , 5  
TCACCAAAGTTGTTTCTCTCGCTTCCTCCTTCCCTCTCCCCCTTCCCCCCTCTCTTTAGATGGAAGTGAT  
TGTTGGGGACTTTGGGATCGTCGTGGTACCCAGGGATGCAGCGGACACAGGCCGGATCATGAATCACTCC  
TCCATACTCCGCAAGTACAAAGTGAGTCCTCCA , 4  
TCACCAAAGTTGTTTCTCTCGCTTCCTCCTTCCCTCTCCCCCTTCCCCCCTCTCTTTAGATGGAAGTGAT  
TGTTGGGGACTTTGGGATCGTCGTGGTACCCAGGGATGCAGCGGACACAGACCGGATCATGAATCGCTCC  
TCCATACTCCGCAAGTACAAAGTGAGTCCTCCA , 4  
TCACCAAAGTTGTTTCTCTCGCTTCCTCCTTCCCTCTCCCCCTTCCCCCCTCTCTTTAGATGGAAGTGAT  
TGTTGGGGACTTTGGGATCGTCGTGGTACCCAGGGATGCAGCAGACACAGACCGGATCATGAATCACTCC  
TCCATACTCCGCAAGTACAAAGTGAGTCCTCCA , 4  
TCACCAAAGTTGTTTCTCTCGCTTCCTCCTTCCCTCTCCCCCTTCCCCCCTCTCTTTAGATGGAAGTGAT  
TGTTGGGGACTTTGGGATCGTCGTGGTACCCAGGGATGCAGCGGACACAGACCGGATCATGAATCACTCC  
TCCATACTCCGCAAGTACAAAGTGAGTCCTCCA , 4  
TCACCAAAGTTGTTTCTCTCGCTTCCTCCTTCCCTCTCCCCCTTCCCCCCTCTCTTTAGATGGAAGTGAT  
TGTTGGGGACTTTGGGATCGTCGTGGTACCCAGGGATGCAGCGGACACAGACCGGATCATGAATCACTCC  
TCCATACTCCGCGAGTACAAAGTGAGTCCTCCA , 4  
TCACCAAAGTTGTTTCTCTCGCTTCCTCCTTCCCTCTCCCCCTTCCCCCCTCTCTTTAGATGGAAGTGATT  
GTTGGGGACTTTGGGATCGTCGTGGTACCCAGGGATGCAGCGGACACAGACCGGATCATGAATCACTCCT  
CCATACTCCGCAAGTACAAAGTGAGTCCTCCA , 3

GEIC-Plate01-G01 TOTAL:3656 OrderedDict([('WT\_sp1', 1821), ('R232Q', 1742), ('Silent Block Mod', 0), ('R232Q (Full ssODN)', 1585), ('Silent Block Mod (Full ssODN)', 0)]) [(0, 3642), (-1, 13), (-3, 1)]  
TCACCAAAGTTGTTTCTCTCGCTTCCTCCTTCCCTCTCCCCCTTCCCCCCTCTCTTTAGATGGAAGTGAT  
TGTTGGGGACTTTGGGATCGTCGTGGTACCCAGGGATGCAGCGGACACAGACCGGATCATGAATCACTCC  
TCCATACTCCGCAAGTACAAAGTGAGTCCTCCA , 1645  
TCACCAAAGTTGTTTCTCTCGCTTCCTCCTTCCCTCTCCCCCTTCCCCCCTCTCTTTAGATGGAAGTGAT  
TGTTGGGGACTTTGGGATCGTCGTGGTACCCCAAGATGCAGCGGACACAGACCGGATCATGAATCACTCC  
TCCATACTCCGCAAGTACAAAGTGAGTCCTCCA , 1572  
TCACCAAAGTTGTTTCTCTCGCTTCCTCCTTCCCTCTCCCCCTTCCCCCCTCTCTTTAGATGGAAGTGAT  
TGTTGGGGACTTTGGGATCGTCGTGGTACCCAGGGATGCAGCGGACACAGACCGGATCATGAATCGCTCC  
TCCATACTCCGCAAGTACAAAGTGAGTCCTCCA , 9  
TCACCAAAGTTGTTTCTCTCGCTTCCTCCTTCCCTCTCCCCCTTCCCCCCTCTCTTTAGATGGAAGTGAT  
TGTTGGGGACTTTGGGATCGTCGTGGTACCCAGGGATGCAGCGGACACAGACCGGATCATGAATCACTCC  
TCCATACTCCGCAAGTACAAAGTGAGTCCTCCA , 9  
TCACCAAAGTTGTTTCTCTCGCTTCCTCCTTCCCTCTCCCCCTTCCCCCCTCTCTTTAGATGGAAGTGAT  
TGTTGGGGACTTTGGGATCGTCGTGGTACCCCAAGATGCAGCGGACACAGACCGGATCATGAATCACTCC  
TCCATACTCCGCAAGTACAAAGTGAGTCCTCCA , 9  
TCACCAAAGTTGTTTCTCTCGCTTCCTCCTTCCCTCTCCCCCTTCCCCCCTCTCTTTAGATGGAAGTGAT  
TGTTGGGGACTGTGGGATCGTCGTGGTACCCAGGGATGCAGCGGACACAGACCGGATCATGAATCACTCC

TCCATACTCCGCAAGTACAAAGTGAGTCCTCCA , 7  
TCACCAAAGTTGTTTCTCTCGCTTCCTCCTTCCCTCTCCCCCTTCCCCCCTCTCTTTAGATGGAAGTGAT  
TGTTGGGGACGTTGGGATCGTCGTGGTACCCCAAGATGCAGCGGACACAGACCGGATCATGAATCACTCC  
TCCATACTCCGCAAGTACAAAGTGAGTCCTCCA , 6  
TCACCAAAGTTGTTTCTCTCGCTTCCTCCTTCCCTCTCCCCCTTCCCCCCTCTCTTTAGATGGAAGTGAT  
TGTTGGGGACGTTGGGATCGTCGTGGTACCCAGGGATGCAGCGGACACAGACCGGATCATGAATCACTCC  
TCCATACTCCGCAAGTACAAAGTGAGTCCTCCA , 5  
TCACCAAAGTTGTTTCTCTCGCTTCCTCCTTCCCTCTCCCCCTTCCCCCCTCTCTTTAGATGGAAGTGAT  
TGTTGGGGACTTTGGGATCGTCGTGGTACCCCAAGATGCAGCGGACACAGACCGGATCATGAATCACTCC  
TCCATGCTCCGCAAGTACAAAGTGAGTCCTCCA , 5  
TCACCAAAGTTGTTTCTCTCGCTTCCTCCTTCCCTCTCCCCCTTCCCCCCTCTCTTTAGATGGAAGTGAT  
TGTTGGGGACTTTGGGATCGTCGTGGTACCCAGGGATGCAGCGGACACAGGCCGGATCATGAATCACTCC  
TCCATACTCCGCAAGTACAAAGTGAGTCCTCCA , 4  
TCACCAAAGTTGTTTCTCTCGCTTCCTCCTTCCCTCTCCCCCTTCCCCCCTCTCTTTAGATGGAAGTGAT  
TGTTGGGGACTTTGGGATCGTCGTGGTACCCAGGGATGCAGCGGACACAGACCGGATCATGAATCACTCC  
TCCATGCTCCGCAAGTACAAAGTGAGTCCTCCA , 4  
TCACCAAAGTTGTTTCTCTCGCTTCCTCCTTCCCTCTCCCCCTTCCCCCCTCTCTTTAGATGGAAGTGAT  
TGTTGGGGACTTTGGGATCGTCGTGGTACCCAGGGATGCAGCGGACACAGACCGATCATGAATCACTCC  
TCCATACTCCGCAAGTACAAAGTGAGTCCTCCA , 4

GEIC-Plate01-G02 TOTAL:3039 OrderedDict([('WT\_sp1', 1483), ('R232Q', 1486), ('Silent Block Mod', 0), ('R232Q (Full ssODN)', 1345), ('Silent Block Mod (Full ssODN)', 0)]) [(0, 3030), (-1, 8), (-2, 1)]  
TCACCAAAGTTGTTTCTCTCGCTTCCTCCTTCCCTCTCCCCCTTCCCCCCTCTCTTTAGATGGAAGTGAT  
TGTTGGGGACTTTGGGATCGTCGTGGTACCCAGGGATGCAGCGGACACAGACCGGATCATGAATCACTCC  
TCCATACTCCGCAAGTACAAAGTGAGTCCTCCA , 1333  
TCACCAAAGTTGTTTCTCTCGCTTCCTCCTTCCCTCTCCCCCTTCCCCCCTCTCTTTAGATGGAAGTGAT  
TGTTGGGGACTTTGGGATCGTCGTGGTACCCCAAGATGCAGCGGACACAGACCGGATCATGAATCACTCC  
TCCATACTCCGCAAGTACAAAGTGAGTCCTCCA , 1327  
TCACCAAAGTTGTTTCTCTCGCTTCCTCCTTCCCTCTCCCCCTTCCCCCCTCTCTTTAGATGGAAGTGAT  
TGTTGGGGACTTTGGGATCGTCGTGGTACCCAGGGATGCAGCGGACACAGACCGGATCATGAATCACTCC  
TCCATACTCCGCAAGTACAAAGTGAGTCCTCCA , 12  
TCACCAAAGTTGTTTCTCTCGCTTCCTCCTTCCCTCTCCCCCTTCCCCCCTCTCTTTAGATGGAAGTGAT  
TGTTGGGGACTGTGGGATCGTCGTGGTACCCCAAGATGCAGCGGACACAGACCGGATCATGAATCACTCC  
TCCATACTCCGCAAGTACAAAGTGAGTCCTCCA , 11  
TCACCAAAGTTGTTTCTCTCGCTTCCTCCTTCCCTCTCCCCCTTCCCCCCTCTCTTTAGATGGAAGTGAT  
TGTTGGGGACGTTGGGATCGTCGTGGTACCCCAAGATGCAGCGGACACAGACCGGATCATGAATCACTCC  
TCCATACTCCGCAAGTACAAAGTGAGTCCTCCA , 9  
TCACCAAAGTTGTTTCTCTCGCTTCCTCCTTCCCTCTCCCCCTTCCCCCCTCTCTTTAGATGGAAGTGAT  
TGTTGGGGACTTTGGGATCGTCGTGGTACCCCAAGATGCAGCGGACACAGACCGGATCATGAATCACTCC  
TCCATACGCCGCAAGTACAAAGTGAGTCCTCCA , 7  
TCACCAAAGTTGTTTCTCTCGCTTCCTCCTTCCCTCTCCCCCTTCCCCCCTCTCTTTAGATGGAAGTGAT  
TGTTGGGGACTGTGGGATCGTCGTGGTACCCAGGGATGCAGCGGACACAGACCGGATCATGAATCACTCC  
TCCATACTCCGCAAGTACAAAGTGAGTCCTCCA , 7  
TCACCAAAGTTGTTTCTCTCGCTTCCTCCTTCCCTCTCCCCCTTCCCCCCTCTCTTTAGATGGAAGTGAT  
TGTTGGGGACGTTGGGATCGTCGTGGTACCCAGGGATGCAGCGGACACAGACCGGATCATGAATCACTCC  
TCCATACTCCGCAAGTACAAAGTGAGTCCTCCA , 6  
TCACCAAAGTTGTTTCTCTCGCTTCCTCCTTCCCTCTCCCCCTTCCCCCCTCTCTTTAGATGGAAGTGAT  
TGTTGGGGACTTTGGGATCGTCGTGGTACCCCAAGATGCAGCGGACACAGACCGGATCATGAATCGCTCC

TCCATACTCCGCAAGTACAAAGTGAGTCCTCCA , 5  
TCACCAAAGTTGTTTCTCTCGTTCCCTCCTTCCCTCTCCCCCTTCCCCCCTCTCTTTAGATGGAAGTGAT  
TGTTGGGGACTTTGGGATCGTCGTGGTACCCCAAGATGCAGCGGACACAGACCGGATCATGAATCACTCC  
GCCATACTCCGCAAGTACAAAGTGAGTCCTCCA , 4  
TCACCAAAGTTGTTTCTCTCGTTCCCTCCTTCCCTCTCCCCCTTCCCCCCTCTCTTTAGATGGAAGTGAT  
TGTTGGGGACTTTGGGATCGTCGTGGTACCCAGGGATGCAGCGGACACAGGCCGGATCATGAATCACTCC  
TCCATACTCCGCAAGTACAAAGTGAGTCCTCCA , 3  
TCACCAAAGTTGTTTCTCTCGTTCCCTCCTTCCCTCTCCCCCTTCCCCCCTCTCTTTAGATGGAAGTGAT  
TGTTGGGGACTTTGGGATCGTCGTGGTACCCAGGGATGCAGCGGACACAGACCGGATCATGAATCGCTCC  
TCCATACTCCGCAAGTACAAAGTGAGTCCTCCA , 3

GEIC-Plate01-G03 TOTAL:3089 OrderedDict([('WT\_sp1', 3030), ('R232Q',  
0), ('Silent Block Mod', 0), ('R232Q (Full ssODN)', 0), ('Silent Block  
Mod (Full ssODN)', 0)]) [(0, 3075), (-1, 13), (1, 1)]  
TCACCAAAGTTGTTTCTCTCGTTCCCTCCTTCCCTCTCCCCCTTCCCCCCTCTCTTTAGATGGAAGTGAT  
TGTTGGGGACTTTGGGATCGTCGTGGTACCCAGGGATGCAGCGGACACAGACCGGATCATGAATCACTCC  
TCCATACTCCGCAAGTACAAAGTGAGTCCTCCA , 2610  
TCACCAAAGTTGTTTCTCTCGTTCCCTCCTTCCCTCTCCCCCTTCCCCCCTCTCTTTAGATGGAAGTGAT  
TGTTGGGGACTTTGGGATCGTCGTGGTACCCAGGGATGCAGCGGACACAGACCGGATCATGAATCACTCC  
TCCATACTCCGCAAGTACAAAGTGAGTCCTCCA , 25  
TCACCAAAGTTGTTTCTCTCGTTCCCTCCTTCCCTCTCCCCCTTCCCCCCTCTCTTTAGATGGAAGTGAT  
TGTTGGGGACTTTGGGATCGTCGTGGTACCCAGGGATGCAGCGGACACAGACCGGATCATGAATCACTCC  
TCCATACTCCGCAAGTACAAAGTGAGTCCTCCA , 12  
TCACCAAAGTTGTTTCTCTCGTTCCCTCCTTCCCTCTCCCCCTTCCCCCCTCTCTTTAGATGGAAGTGAT  
TGTTGGGGACTTTGGGATCGTCGTGGTACCCAGGGATGCAGCGGACACAGACCGGATCATGAATCACTCC  
TCCATACTCCGCAAGTACAAAGTGAGTCCTCCA , 12  
TCACCAAAGTTGTTTCTCTCGTTCCCTCCTTCCCTCTCCCCCTTCCCCCCTCTCTTTAGATGGAAGTGAT  
TGTTGGGGACTTTGGGATCGTCGTGGTACCCAGGGATGCAGCGGACACAGACCGGATCATGAATCACTCC  
GCCATACTCCGCAAGTACAAAGTGAGTCCTCCA , 12  
TCACCAAAGTTGTTTCTCTCGTTCCCTCCTTCCCTCTCCCCCTTCCCCCCTCTCTTTAGATGGAAGTGAT  
TGTTGGGGACTTTGGGATCGTCGTGGTACCCAGGGATGCAGCGGACACAGACCGGATCATGAATCACTCC  
TCCATACTCCGCAAGTACAAAGTGAGTCCTCCA , 9  
TCACCAAAGTTGTTTCTCTCGTTCCCTCCTTCCCTCTCCCCCTTCCCCCCTCTCTTTAGATGGAAGTGAT  
TGTTGGGGACTTTGGGATCGTCGTGGTACCCAGGGATGCAGCGGACACAGACCGGATCATGAATCGCTCC  
TCCATACTCCGCAAGTACAAAGTGAGTCCTCCA , 9  
TCACCAAAGTTGTTTCTCTCGTTCCCTCCTTCCCTCTCCCCCTTCCCCCCTCTCTTTAGATGGAAGTGAT  
TGTTGGGGACTTTGGGATCGTCGTGGTACCCAGGGATGCAGCGGACACAGACCGGATCATGAATCACTCC  
TCCATACTCCGCAAGTACAAAGTGAGTCCTCCA , 8  
TCACCAAAGTTGTTTCTCTCGTTCCCTCCTTCCCTCTCCCCCTTCCCCCCTCTCTTTAGATGGAAGTGATT  
GTTGGGGACTTTGGGATCGTCGTGGTACCCAGGGATGCAGCGGACACAGACCGGATCATGAATCACTCCT  
CCATACTCCGCAAGTACAAAGTGAGTCCTCCA , 8  
TCACCAAAGTTGTTTCTCTCGTTCCCTCCTTCCCTCTCCCCCTTCCCCCCTCTCTTTAGATGGAAGTGAG  
TGTTGGGGACTTTGGGATCGTCGTGGTACCCAGGGATGCAGCGGACACAGACCGGATCATGAATCACTCC  
TCCATACTCCGCAAGTACAAAGTGAGTCCTCCA , 6  
TCACCAAAGTTGTTTCTCTCGTTCCCTCCTTCCCTCTCCCCCTTCCCCCCTCTCTTTAGATGGAAGTGAT  
TGTTGGGGACTTTGGGGTCGTCTGGTACCCAGGGATGCAGCGGACACAGACCGGATCATGAATCACTCC  
TCCATACTCCGCAAGTACAAAGTGAGTCCTCCA , 5  
TCACCAAAGTTGTTTCTCTCGTTCCCTCCTTCCCTCTCCCCCTTCCCCCCTCTCTTTAGATGGAAGTGAT  
TGTTGGGGACTTTGTGATCGTCGTGGTACCCAGGGATGCAGCGGACACAGACCGGATCATGAATCACTCC

TCCATACTCCGCAAGTACAAAGTGAGTCCTCCA , 5

GEIC-Plate01-G04 TOTAL:3957 OrderedDict([('WT\_sp1', 3900), ('R232Q', 0), ('Silent Block Mod', 1), ('R232Q (Full ssODN)', 0), ('Silent Block Mod (Full ssODN)', 1)]) [(0, 3941), (-1, 15), (-2, 1)]

TCACCAAAGTTGTTTCTCTCGCTTCCTCCTTCCCTCTCCCCCTTCCCCCTCTCTTTAGATGGAAGTGAT  
TGTTGGGGACTTTGGGATCGTCGTGGTACCCAGGGATGCAGCGGACACAGACCGGATCATGAATCACTCC  
TCCATACTCCGCAAGTACAAAGTGAGTCCTCCA , 3450

TCACCAAAGTTGTTTCTCTCGCTTCCTCCTTCCCTCTCCCCCTTCCCCCTCTCTTTAGATGGAAGTGAT  
TGTTGGGGACTTTGGGATCGTCGTGGTACCCAGGGATGCAGCGGACACAGACCGGATCATGAATCACTCC  
TCCATACTCCGCAAGTACAAAGTGAGTCCTCCA , 21

TCACCAAAGTTGTTTCTCTCGCTTCCTCCTTCCCTCTCCCCCTTCCCCCTCTCTTTAGATGGAAGTGAT  
TGTTGGGGACTGTGGGATCGTCGTGGTACCCAGGGATGCAGCGGACACAGACCGGATCATGAATCACTCC  
TCCATACTCCGCAAGTACAAAGTGAGTCCTCCA , 18

TCACCAAAGTTGTTTCTCTCGCTTCCTCCTTCCCTCTCCCCCTTCCCCCTCTCTTTAGATGGAAGTGAT  
TGTTGGGGACTTTGGGATCGTCGTGGTACCCAGGGATGCAGCGGACACAGACCGGATCATGAATCGCTCC  
TCCATACTCCGCAAGTACAAAGTGAGTCCTCCA , 17

TCACCAAAGTTGTTTCTCTCGCTTCCTCCTTCCCTCTCCCCCTTCCCCCTCTCTTTAGATGGAAGTGAT  
TGTTGGGGACTTTGGGATCGTCGTGGTACCCAGGGATGCAGCGGACACAGACCGGATCATGAATCACTCC  
TCCATACTCCGCAAGTACAAAGTGAGTCCTCCA , 11

TCACCAAAGTTGTTTCTCTCGCTTCCTCCTTCCCTCTCCCCCTTCCCCCTCTCTTTAGATGGAAGTGAT  
TGTTGGGGACTTTGGGATCGTCGTGGTACCCAGGGATGCAGCGGACACAGACCGGATCATGAATCACTCC  
TCCATACTCCGCAAGTACAAAGTGAGTCCTCCA , 10

TCACCAAAGTTGTTTCTCTCGCTTCCTCCTTCCCTCTCCCCCTTCCCCCTCTCTTTAGATGGAAGTGAT  
TGTTGGGGACTTTGGGATCGTCGTGGTACCCAGGGATGCAGCGGACACAGACCGGATCATGAATCACTCC  
TCCATACTCCGCAAGTACAAAGTGAGTCCTCCA , 8

TCACCAAAGTTGTTTCTCTCGCTTCCTCCTTCCCTCTCCCCCTTCCCCCTCTCTTTAGATGGAAGTGAG  
TGTTGGGGACTTTGGGATCGTCGTGGTACCCAGGGATGCAGCGGACACAGACCGGATCATGAATCACTCC  
TCCATACTCCGCAAGTACAAAGTGAGTCCTCCA , 7

TCACCAAAGTTGTTTCTCTCGCTTCCTCCTTCCCTCTCCCCCTTCCCCCTCTCTTTAGATGGAAGTGAT  
TGTTGGGGACTTTGGGATCGTCGTGGTACCCAGGGATGCAGCGGACACTGACCGGATCATGAATCACTCC  
TCCATACTCCGCAAGTACAAAGTGAGTCCTCCA , 5

TCACCAAAGTTGTTTCTCTCGCTTCCTCCTTCCCTCTCCCCCTTCCCCCTCTCTTTAGATGGAAGTGAT  
TGTTGGGGACTTTGGGATCGTCGTGGTACCCAGGGATGCAGCGGACACAGACCGGATCATGAATCACTCC  
TCCATGCTCCGCAAGTACAAAGTGAGTCCTCCA , 5

TCACCAAAGTTGTTTCTCTCGCTTCCTCCTTCCCTCTCCCCCTTCCCCCTCTCTTTAGATGGAAGTGAT  
TGTTGGGGACTTTGGGATCGTCGTGGTACCCAGGGATGCAGCGGACACAGACCGGATCATGAATCACTCC  
TCCATACTCCGCAAGTACCAAGTGAGTCCTCCA , 5

TCACCAAAGTTGTTTCTCTCGCTTCCTCCTTCCCTCTCCCCCTTCCCCCTCTCTTTAGATGGAAGTGAT  
TGTTGGGGACTTTGGGATCGTCGTGGTACCCAGGGATGCAGCGGACACAGACCGGATCATGAATCACTCC  
GCCATACTCCGCAAGTACAAAGTGAGTCCTCCA , 5

GEIC-Plate01-G05 TOTAL:3305 OrderedDict([('WT\_sp1', 1578), ('R232Q', 0), ('Silent Block Mod', 1621), ('R232Q (Full ssODN)', 0), ('Silent Block Mod (Full ssODN)', 1422)]) [(0, 3295), (-1, 8), (1, 1), (-29, 1)]

TCACCAAAGTTGTTTCTCTCGCTTCCTCCTTCCCTCTCCCCCTTCCCCCTCTCTTTAGATGGAAGTGAT  
TGTTGGGGACTTTGGGATCGTCGTGGTACCCGATGCAGCGGACACAGACCGGATCATGAATCACTCC

TCCATACTCCGCAAGTACAAAGTGAGTCCTCCA , 1409  
TCACCAAAGTTGTTTCTCTCGCTTCCTCCTTCCCTCTCCCCCTTCCCCCCTCTCTTTAGATGGAAGTGAT  
TGTTGGGGACTTTGGGATCGTCGTGGTACCCAGGGATGCAGCGGACACAGACCGGATCATGAATCACTCC  
TCCATACTCCGCAAGTACAAAGTGAGTCCTCCA , 1351  
TCACCAAAGTTGTTTCTCTCGCTTCCTCCTTCCCTCTCCCCCTTCCCCCCTCTCTTTAGATGGAAGTGAT  
TGTTGGGGACTTTGGGATCGTCGTGGTACCCCGTGATGCAGCGGACACAGACCGGATCATGAATCACTCC  
TCCATACTCCGCAAGTACAAAGTGAGTCCTCCA , 12  
TCACCAAAGTTGTTTCTCTCGCTTCCTCCTTCCCTCTCCCCCTTCCCCCCTCTCTTTAGATGGAAGTGAT  
TGTTGGGGACTTTGGGATCGTCGTGGTACCCAGGGATGCAGCGGACACAGACCGGATCATGAATCACTCC  
TCCATACTCCGCAAGTACAAAGTGAGTCCTCCA , 12  
TCACCAAAGTTGTTTCTCTCGCTTCCTCCTTCCCTCTCCCCCTTCCCCCCTCTCTTTAGATGGAAGTGAT  
TGTTGGGGACTTTGGGATCGTCGTGGTACCCCGTGATGCAGCGGACACAGACCGGATCATGAATCGCTCC  
TCCATACTCCGCAAGTACAAAGTGAGTCCTCCA , 11  
TCACCAAAGTTGTTTCTCTCGCTTCCTCCTTCCCTCTCCCCCTTCCCCCCTCTCTTTAGATGGAAGTGAT  
TGTTGGGGACTGTGGGATCGTCGTGGTACCCCGTGATGCAGCGGACACAGACCGGATCATGAATCACTCC  
TCCATACTCCGCAAGTACAAAGTGAGTCCTCCA , 10  
TCACCAAAGTTGTTTCTCTCGCTTCCTCCTTCCCTCTCCCCCTTCCCCCCTCTCTTTAGATGGAAGTGAT  
TGTTGGGGACTTTGGGATCGTCGTGGTACCCAGGGATGCAGCGGACACAGACCGGATCATGAATCACTCC  
TCCATACTCCGCAAGTACAAAGTGAGTCCTCCA , 9  
TCACCAAAGTTGTTTCTCTCGCTTCCTCCTTCCCTCTCCCCCTTCCCCCCTCTCTTTAGATGGAAGTGAT  
TGTTGGGGACTGTGGGATCGTCGTGGTACCCAGGGATGCAGCGGACACAGACCGGATCATGAATCACTCC  
TCCATACTCCGCAAGTACAAAGTGAGTCCTCCA , 6  
TCACCAAAGTTGTTTCTCTCGCTTCCTCCTTCCCTCTCCCCCTTCCCCCCTCTCTTTAGATGGAAGTGAT  
TGTTGGGGACTTTGGGATCGTCGTGGTACCCAGGGATGCAGCGGACACAGACCGGATCATGAATCACTCC  
TCCATGCTCCGCAAGTACAAAGTGAGTCCTCCA , 5  
TCACCAAAGTTGTTTCTCTCGCTTCCTCCTTCCCTCTCCCCCTTCCCCCCTCTCTTTAGATGGAAGTGAT  
TGTTGGGGACTTTGGGATCGTCGTGGTACCCCGTGATGCAGCGGACACAGACCGGATCATGAATCACTCC  
TCCATGCTCCGCAAGTACAAAGTGAGTCCTCCA , 5  
TCACCAAAGTTGTTTCTCTCGCTTCCTCCTTCCCTCTCCCCCTTCCCCCCTCTCTTTAGATGGAAGTGAT  
TGTTGGGGACTTTGGGATCGTCGTGGTACCCCGTGATGCAGCGGACACAGACCGGATCATGAATCACTCC  
GCCATACTCCGCAAGTACAAAGTGAGTCCTCCA , 4  
TCACCAAAGTTGTTTCTCTCGCTTCCTCCTTCCCTCTCCCCCTTCCCCCCTCTCTTTAGATGGAAGTGAT  
TGTTGGGGACTTTGGGATCGTCGTGGTACCCAGGGATGCAGCGGACACAGACCGGATCATGAATCGCTCC  
TCCATACTCCGCAAGTACAAAGTGAGTCCTCCA , 4

GEIC-Plate01-G06 TOTAL:3155 OrderedDict([('WT\_sp1', 1613), ('R232Q',  
0), ('Silent Block Mod', 1492), ('R232Q (Full ssODN)', 0), ('Silent  
Block Mod (Full ssODN)', 1368)]) [(0, 3144), (-1, 11)]  
TCACCAAAGTTGTTTCTCTCGCTTCCTCCTTCCCTCTCCCCCTTCCCCCCTCTCTTTAGATGGAAGTGAT  
TGTTGGGGACTTTGGGATCGTCGTGGTACCCAGGGATGCAGCGGACACAGACCGGATCATGAATCACTCC  
TCCATACTCCGCAAGTACAAAGTGAGTCCTCCA , 1462  
TCACCAAAGTTGTTTCTCTCGCTTCCTCCTTCCCTCTCCCCCTTCCCCCCTCTCTTTAGATGGAAGTGAT  
TGTTGGGGACTTTGGGATCGTCGTGGTACCCCGTGATGCAGCGGACACAGACCGGATCATGAATCACTCC  
TCCATACTCCGCAAGTACAAAGTGAGTCCTCCA , 1353  
TCACCAAAGTTGTTTCTCTCGCTTCCTCCTTCCCTCTCCCCCTTCCCCCCTCTCTTTAGATGGAAGTGAT  
TGTTGGGGACTTTGGGATCGTCGTGGTACCCCGTGATGCAGCGGACACAGACCGGATCATGAATCACTCC  
TCCATACTCCGCAAGTACAAAGTGAGTCCTCCA , 10  
TCACCAAAGTTGTTTCTCTCGCTTCCTCCTTCCCTCTCCCCCTTCCCCCCTCTCTTTAGATGGAAGTGAT  
TGTTGGGGACTTTGGGATCGTCGTGGTACCCAGGGATGCAGCGGACACAGACCGGATCATGAATCACTCC

TCCATACTCCGCAAGTACAAAGTGAGTCCTCCA , 8  
TCACCAAAGTTGTTTCTCTCGCTTCCTCCTTCCCTCTCCCCCTTCCCCCCTCTCTTTAGATGGAAGTGAT  
TGTTGGGGACTTTGGGATCGTCGTGGTACCCAGGGATGCAGCGGACACAGACCGGATCATGAATCACTCC  
TCCATACTCCGCAAGTACAAAGTGAGTCCTCCA , 6  
TCACCAAAGTTGTTTCTCTCGCTTCCTCCTTCCCTCTCCCCCTTCCCCCCTCTCTTTAGATGGAAGTGAT  
TGTTGGGGACTGTGGGATCGTCGTGGTACCCAGGGATGCAGCGGACACAGACCGGATCATGAATCACTCC  
TCCATACTCCGCAAGTACAAAGTGAGTCCTCCA , 5  
TCACCAAAGTTGTTTCTCTCGCTTCCTCCTTCCCTCTCCCCCTTCCCCCCTCTCTTTAGATGGAAGTGAT  
TGTTGGGGACTTTGGGATCGTCGTGGTACCCAGGGATGCAGCGGACACAGACCGGATCATGAATCACTCC  
TACATACTCCGCAAGTACAAAGTGAGTCCTCCA , 4  
TCACCAAAGTTGTTTCTCTCGCTTCCTCCTTCCCTCTCCCCCTTCCCCCCTCTCTTTAGATGGAAGTGAT  
TGTTGGGGACTTTGGGATCGTCGTGGTACCCGTGATGCAGCGGACACAGACCGGATCATGAATCGCTCC  
TCCATACTCCGCAAGTACAAAGTGAGTCCTCCA , 4  
TCACCAAAGTTGTTTCTCTCGCTTCCTCCTTCCCTCTCCCCCTTCCCCCCTCTCTTTAGATGGAAGTGAT  
TGTTGGGGACTTTGGGATCGTCGTGGTACCCGTGATGCAGCGGACACAGGCGGATCATGAATCACTCC  
TCCATACTCCGCAAGTACAAAGTGAGTCCTCCA , 4  
TCACCAAAGTTGTTTCTCTCGCTTCCTCCTTCCCTCTCCCCCTTCCCCCCTCTCTTTAGATGGAAGTGAT  
TGTTGGGGACTGTGGGATCGTCGTGGTACCCGTGATGCAGCGGACACAGACCGGATCATGAATCACTCC  
TCCATACTCCGCAAGTACAAAGTGAGTCCTCCA , 3  
TCACCAAAGTTGTTTCTCTCGCTTCCTCCTTCCCTCTCCCCCTTCCCCCCTCTCTTTAGATGGAAGTGAT  
TGTTGGGGACTATGGGATCGTCGTGGTACCCAGGGATGCAGCGGACACAGACCGGATCATGAATCACTCC  
TCCATACTCCGCAAGTACAAAGTGAGTCCTCCA , 3  
TCACCAAAGTTGTTTCTCTCGCTTCCTCCTTCCCTCTCCCCCTTCCCCCCTCTCTTTAGATGGAAGTGAT  
TGTTGGGGACTTTGGGATCTTCGTGGTACCCGTGATGCAGCGGACACAGACCGGATCATGAATCACTCC  
TCCATACTCCGCAAGTACAAAGTGAGTCCTCCA , 3

GEIC-Plate01-G07 TOTAL:3109 OrderedDict([('WT\_sp1', 3049), ('R232Q', 0), ('Silent Block Mod', 0), ('R232Q (Full ssODN)', 0), ('Silent Block Mod (Full ssODN)', 0)]) [(0, 3096), (-1, 12), (1, 1)]  
TCACCAAAGTTGTTTCTCTCGCTTCCTCCTTCCCTCTCCCCCTTCCCCCCTCTCTTTAGATGGAAGTGAT  
TGTTGGGGACTTTGGGATCGTCGTGGTACCCAGGGATGCAGCGGACACAGACCGGATCATGAATCACTCC  
TCCATACTCCGCAAGTACAAAGTGAGTCCTCCA , 2708  
TCACCAAAGTTGTTTCTCTCGCTTCCTCCTTCCCTCTCCCCCTTCCCCCCTCTCTTTAGATGGAAGTGAT  
TGTTGGGGACTTTGGGATCGTCGTGGTACCCAGGGATGCAGCGGACACAGACCGGATCATGAATCACTCC  
TCCATACTCCGCAAGTACAAAGTGAGTCCTCCA , 26  
TCACCAAAGTTGTTTCTCTCGCTTCCTCCTTCCCTCTCCCCCTTCCCCCCTCTCTTTAGATGGAAGTGAT  
TGTTGGGGACTTTGGGATCGTCGTGGTACCCAGGGATGCAGCGGACACAGACCGGATCATGAATCGCTCC  
TCCATACTCCGCAAGTACAAAGTGAGTCCTCCA , 13  
TCACCAAAGTTGTTTCTCTCGCTTCCTCCTTCCCTCTCCCCCTTCCCCCCTCTCTTTAGATGGAAGTGAT  
TGTTGGGGACTGTGGGATCGTCGTGGTACCCAGGGATGCAGCGGACACAGACCGGATCATGAATCACTCC  
TCCATACTCCGCAAGTACAAAGTGAGTCCTCCA , 12  
TCACCAAAGTTGTTTCTCTCGCTTCCTCCTTCCCTCTCCCCCTTCCCCCCTCTCTTTAGATGGAAGTGAT  
TGTTGGGGACTTTGGGATCGTCGTGGTACCCAGGGATGCAGCGGACACAGACCGGATCATGAATCACTCC  
TCCATACTCCGCAAGTACAAAGTGAGTCCTCCA , 11  
TCACCAAAGTTGTTTCTCTCGCTTCCTCCTTCCCTCTCCCCCTTCCCCCCTCTCTTTAGATGGAAGTGAT  
TGTTGGGGACTTTGGGATCGTCGTGGTACCCAGGGATGCAGCGGACACAGACCGGATCATGAATCACTCC  
TCCATACTCCGCAAGTACAAAGTGAGTCCTCCA , 10  
TCACCAAAGTTGTTTCTCTCGCTTCCTCCTTCCCTCTCCCCCTTCCCCCCTCTCTTTAGATGGAAGTGAT  
TGTTGGGGACTTTGGGATCGTCGTGGTACCCAGGGATGCAGCGGACACAGACCGGATCATGAATCACTCC

TCCATACGCCGCAAGTACAAAGTGAGTCCTCCA , 6  
TCACCAAAGTTGTTTCTCTCGCTTCCTCCTTCCCTCTCCCCCTTCCCCCTCTCTTTAGATGGAAGTGAG  
TGTTGGGGACTTTGGGATCGTCGTGGTACCCAGGGATGCAGCGGACACAGACCGGATCATGAATCACTCC  
TCCATACTCCGCAAGTACAAAGTGAGTCCTCCA , 5  
TCACCAAAGTTGTTTCTCTCGCTTCCTCCTTCCCTCTCCCCCTTCCCCCTCTCTTTAGATGGAAGTGAT  
TGTTGGGGACTTTGGGATCGTCGTGGTCCCAGGGATGCAGCGGACACAGACCGGATCATGAATCACTCC  
TCCATACTCCGCAAGTACAAAGTGAGTCCTCCA , 4  
TCACCAAAGTTGTTTCTCTCGCTTCCTCCTTCCCTCTCCCCCTTCCCCCTCTCTTTAGATGGAAGTGAT  
TGTTGGGGACTTTGGGATCGTCGTGGTACCCAGGGATGCAGCGGACACAGACCGGATCATGAATCACTCC  
TCCATACTCCGCAAGTACAAAGTGAGTCCTCCA , 4  
TCACCAAAGTTGTTTCTCTCGCTTCCTCCTTCCCTCTCCCCCTTCCCCCTCTCTTTAGATGGAAGTGATT  
GTTGGGGACTTTGGGATCGTCGTGGTACCCAGGGATGCAGCGGACACAGACCGGATCATGAATCACTCCT  
CCATACTCCGCAAGTACAAAGTGAGTCCTCCA , 3  
TCACCAAAGTTGTTTCTCTCGCTTCCTCCTTCCCTCTCCCCCTTCCCCCTCTCTTTAGATGGAAGTGATT  
GTTGGGGACTTTGGGATCGTCGTGGTACCCAGGGATGCAGCGGACACAGACCGGATCATGAATCACTCCT  
CCATACTCCGCAAGTACAAAGTGAGTCCTCCA , 3

GEIC-Plate01-G08 TOTAL:2802 OrderedDict([('WT\_sp1', 2769), ('R232Q', 0), ('Silent Block Mod', 0), ('R232Q (Full ssODN)', 0), ('Silent Block Mod (Full ssODN)', 0)]) [(0, 2792), (-1, 9), (1, 1)]  
TCACCAAAGTTGTTTCTCTCGCTTCCTCCTTCCCTCTCCCCCTTCCCCCTCTCTTTAGATGGAAGTGAT  
TGTTGGGGACTTTGGGATCGTCGTGGTACCCAGGGATGCAGCGGACACAGACCGGATCATGAATCACTCC  
TCCATACTCCGCAAGTACAAAGTGAGTCCTCCA , 2504  
TCACCAAAGTTGTTTCTCTCGCTTCCTCCTTCCCTCTCCCCCTTCCCCCTCTCTTTAGATGGAAGTGAT  
TGTTGGGGACTTTGGGATCGTCGTGGTACCCAGGGATGCAGCGGACACAGACCGGATCATGAATCACTCC  
TCCATACTCCGCAAGTACAAAGTGAGTCCTCCA , 17  
TCACCAAAGTTGTTTCTCTCGCTTCCTCCTTCCCTCTCCCCCTTCCCCCTCTCTTTAGATGGAAGTGAT  
TGTTGGGGACTTTGGGATCGTCGTGGTACCCAGGGATGCAGCGGACACAGACCGGATCATGAATCGCTCC  
TCCATACTCCGCAAGTACAAAGTGAGTCCTCCA , 9  
TCACCAAAGTTGTTTCTCTCGCTTCCTCCTTCCCTCTCCCCCTTCCCCCTCTCTTTAGATGGAAGTGAT  
TGTTGGGGACTTTGGGATCGTCGTGGTACCCAGGGATGCAGCGGACACAGACCGGATCATGAATCACTCC  
TCCATACTCCGCAAGTACAAAGTGAGTCCTCCA , 9  
TCACCAAAGTTGTTTCTCTCGCTTCCTCCTTCCCTCTCCCCCTTCCCCCTCTCTTTAGATGGAAGTGAT  
TGTTGGGGACTTTGGGATCGTCGTGGTACCCAGGGATGCAGCGGACACAGACCGGATCATGAATCACTCC  
TCCATACTCCGCAAGTACAAAGTGAGTCCTCCA , 8  
TCACCAAAGTTGTTTCTCTCGCTTCCTCCTTCCCTCTCCCCCTTCCCCCTCTCTTTAGATGGAAGTGAT  
TGTTGGGGACTTTGGGATCGTCGTGGTACCCAGGGATGCAGCGGACACAGACCGGATCATGAATCACTCC  
TCCATACGCCGCAAGTACAAAGTGAGTCCTCCA , 6  
TCACCAAAGTTGTTTCTCTTGCTTCCTCCTTCCCTCTCCCCCTTCCCCCTCTCTTTAGATGGAAGTGAT  
TGTTGGGGACTTTGGGATCGTCGTGGTACCCAGGGATGCAGCGGACACAGACCGGATCATGAATCACTCC  
TCCATACTCCGCAAGTACAAAGTGAGTCCTCCA , 5  
TCACCAAAGTTGTTTCTCTCGCTTCCTCCTTCCCTCTCCCCCTTCCCCCTCTCTTTAGATGGAAGTGAT  
TGTTGGGGACTTTGGGGTCTCGTGGTACCCAGGGATGCAGCGGACACAGACCGGATCATGAATCACTCC  
TCCATACTCCGCAAGTACAAAGTGAGTCCTCCA , 4  
TCACCAAAGTTGTTTCTCTCGCTTCCTCCTTCCCTCTCCCCCTTCCCCCTCTCTTTAGATGGAAGTGAT  
TGTTGGGGACTTTGGGATCGTCGTGGTACCCAGGGATGCAGCGGACACAGACCGGATCATGAATCACTCC  
TCCATACTCCGCAAGTACAAAGTGAGTCCTCCA , 4  
TCACCAAAGTTGTTTCTCTCGCTTCCTCCTTCCCTCTCCCCCTTCCCCCTCTCTTTAGATGGAAGTGGT  
TGTTGGGGACTTTGGGATCGTCGTGGTACCCAGGGATGCAGCGGACACAGACCGGATCATGAATCACTCC

TCCATACTCCGCAAGTACAAAGTGAGTCCTCCA , 4  
TCACCAAAGTTGTTTCTCTCGCTTCCTCCTTCCCTCTCCCCCTTCCCCCCTCTCTTTAGATGGAAGTGAT  
TGTTGGGGACTTTGGGATCGTCGTGGTACCCAGGGATGCAGCGGACACAGGCCGGATCATGAATCACTCC  
TCCATACTCCGCAAGTACAAAGTGAGTCCTCCA , 3  
TCACCAAAGTTGTTTCTCTCGCTTCCTCCTTCCCTCTCCCCCTTCCCCCCTCTCTTTAGATGGAAGTGAT  
TGTTGGGAGACTTTGGGATCGTCGTGGTACCCAGGGATGCAGCGGACACAGACCGGATCATGAATCACTCC  
TCCATACTCCGCAAGTACAAAGTGAGTCCTCCA , 3

GEIC-Plate01-H01 TOTAL:2251 OrderedDict([('WT\_sp1', 1110), ('R232Q', 1), ('Silent Block Mod', 1097), ('R232Q (Full ssODN)', 1), ('Silent Block Mod (Full ssODN)', 1003)]) [(0, 2245), (-1, 5), (-2, 1)]  
TCACCAAAGTTGTTTCTCTCGCTTCCTCCTTCCCTCTCCCCCTTCCCCCCTCTCTTTAGATGGAAGTGAT  
TGTTGGGGACTTTGGGATCGTCGTGGTACCCGTGATGCAGCGGACACAGACCGGATCATGAATCACTCC  
TCCATACTCCGCAAGTACAAAGTGAGTCCTCCA , 995  
TCACCAAAGTTGTTTCTCTCGCTTCCTCCTTCCCTCTCCCCCTTCCCCCCTCTCTTTAGATGGAAGTGAT  
TGTTGGGGACTTTGGGATCGTCGTGGTACCCAGGGATGCAGCGGACACAGACCGGATCATGAATCACTCC  
TCCATACTCCGCAAGTACAAAGTGAGTCCTCCA , 988  
TCACCAAAGTTGTTTCTCTCGCTTCCTCCTTCCCTCTCCCCCTTCCCCCCTCTCTTTAGATGGAAGTGAT  
TGTTGGGGACTGTGGGATCGTCGTGGTACCCGTGATGCAGCGGACACAGACCGGATCATGAATCACTCC  
TCCATACTCCGCAAGTACAAAGTGAGTCCTCCA , 5  
TCACCAAAGTTGTTTCTCTCGCTTCCTCCTTCCCTCTCCCCCTTCCCCCCTCTCTTTAGATGGAAGTGAT  
TGTTGGGGACGTTGGGATCGTCGTGGTACCCAGGGATGCAGCGGACACAGACCGGATCATGAATCACTCC  
TCCATACTCCGCAAGTACAAAGTGAGTCCTCCA , 5  
TCACCAAAGTTGTTTCTCTCGCTTCCTCCTTCCCTCTCCCCCTTCCCCCCTCTCTTTAGATGGAAGTGAT  
TGTTGGGGACTTTGGGATCGTCGTGGTACCCAGGGATGCAGCGGACACAGACCGGATCATGAATCGCTCC  
TCCATACTCCGCAAGTACAAAGTGAGTCCTCCA , 4  
TCACCAAAGTTGTTTCTCTCGCTTCCTCCTTCCCTCTCCCCCTTCCCCCCTCTCTTTAGATGGAAGTGAT  
TGTTGGGGACTGTGGGATCGTCGTGGTACCCAGGGATGCAGCGGACACAGACCGGATCATGAATCACTCC  
TCCATACTCCGCAAGTACAAAGTGAGTCCTCCA , 4  
TCACCAAAGTTGTTTCTCTCGCTTCCTCCTTCCCTCTCCCCCTTCCCCCCTCTCTTTAGATGGAAGTGAT  
TGTTGGGGACTTTGGGATCGTCGTGGTACCCGTGATGCAGCGGACACAGACCGGATCATGAATCACTCC  
TCCATGCTCCGCAAGTACAAAGTGAGTCCTCCA , 4  
TCACCAAAGTTGTTTCTCTCGCTTCCTCCTTCCCTCTCCCCCTTCCCCCCTCTCTTTAGATGGAAGTGAT  
TGTTGGGGACTTTGGGATCGTCGTGGTACCCGTGATGCAGCGGACACAGACCGGATCATGAATCGCTCC  
TCCATACTCCGCAAGTACAAAGTGAGTCCTCCA , 4  
TCACCAAAGTTGTTTCTCTCGCTTCCTCCTTCCCTCTCCCCCTTCCCCCCTCTCTTTAGATGGAAGTGAT  
TGTTGGGGACTTTGGGATCGTCGTGGTACCCAGGGATGCAGCGGACACCGACCGGATCATGAATCACTCC  
TCCATACTCCGCAAGTACAAAGTGAGTCCTCCA , 3  
TCACCAAAGTTGTTTCTCTCGCTTCCTCCTTCCCTCTCCCCCTTCCCCCCTCTCTTTAGATGGAAGTGAT  
TGTTGGGGACTTTGGGATCGTCGTGGTACCCAGGGATGCAGCGGACACGGACCGGATCATGAATCACTCC  
TCCATACTCCGCAAGTACAAAGTGAGTCCTCCA , 3  
TCACCAAAGTTGTTTCTCTCGCTTCCTCCTTCCCTCTCCCCCTTCCCCCCTCTCTTTAGATGGAAGTGAT  
TGTTGGGGACTTTGGGATCGTCGTGGTACCCAGGGATGCAGCGTACACAGACCGGATCATGAATCACTCC  
TCCATACTCCGCAAGTACAAAGTGAGTCCTCCA , 3

GEIC-Plate01-H02 TOTAL:78 OrderedDict([('WT\_sp1', 39), ('R232Q', 37), ('Silent Block Mod', 1), ('R232Q (Full ssODN)', 36), ('Silent Block Mod (Full ssODN)', 1)]) [(0, 78)]

TCACCAAAGTTGTTTCTCTCGCTTCCTCCTTCCCTCTCCCCCTTCCCCCCTCTCTTTAGATGGAAGTGAT  
TGTTGGGGACTTTGGGATCGTCGTGGTACCCCAAGATGCAGCGGACACAGACCGGATCATGAATCACTCC  
TCCATACTCCGCAAGTACAAAGTGAGTCCTCCA , 35

TCACCAAAGTTGTTTCTCTCGCTTCCTCCTTCCCTCTCCCCCTTCCCCCCTCTCTTTAGATGGAAGTGAT  
TGTTGGGGACTTTGGGATCGTCGTGGTACCCAGGGATGCAGCGGACACAGACCGGATCATGAATCACTCC  
TCCATACTCCGCAAGTACAAAGTGAGTCCTCCA , 31

TCACCAAAGTTGTTTCTCTCGCTTCCTCCTTCCCTCTCCCCCTTCCCCCCTCTCTTTAGATGGAAGTGAT  
TGTTGGGGACTTTGGGATCGTCGTGGTACCCAGGGATGCAGCGGACACAGACCGGATCATGAATCACTCC  
TCCATACTCCGCAAGTACAAAGTGAGTCCTCCA , 1

TCACCAAAGTTGTTTCTCTCGCTTCCTCCTTCCCTCTCCCCCTTCCCCCCTCTCTTTAGATGGAAGTGAT  
TGTTGGGGACTTTGGGATCGTCGTGGTACCCCAAGATGCAGCGGACACAGACCGGATCATGAATCACTCC  
TCCATACTCCGCAAGTACAAAGTGAGTCCTCCA , 1

TCACCAAAGTTGTTTCTCTCGCTTCCTCCTTCCCTCTCCCCCTTCCCCCCTCTCTTTAGATGGAAGTGAT  
TGTTGGGGACTTTGGGATCGTCGTGGTACCCCAAGATGCAGCGGACACAGACCGGATCATGAATCACTCC  
TCCATACTCCGCAAGTACAAAGTGAGTCCTCCA , 1

GEIC-Plate01-H03 TOTAL:3394 OrderedDict([('WT\_sp1', 3345), ('R232Q', 0), ('Silent Block Mod', 0), ('R232Q (Full ssODN)', 0), ('Silent Block Mod (Full ssODN)', 0)]) [(0, 3378), (-1, 14), (-2, 2)]

TCACCAAAGTTGTTTCTCTCGCTTCCTCCTTCCCTCTCCCCCTTCCCCCCTCTCTTTAGATGGAAGTGAT  
TGTTGGGGACTTTGGGATCGTCGTGGTACCCAGGGATGCAGCGGACACAGACCGGATCATGAATCACTCC  
TCCATACTCCGCAAGTACAAAGTGAGTCCTCCA , 2978

TCACCAAAGTTGTTTCTCTCGCTTCCTCCTTCCCTCTCCCCCTTCCCCCCTCTCTTTAGATGGAAGTGAT  
TGTTGGGGACTTTGGGATCGTCGTGGTACCCAGGGATGCAGCGGACACAGACCGGATCATGAATCACTCC  
TCCATACTCCGCAAGTACAAAGTGAGTCCTCCA , 16

TCACCAAAGTTGTTTCTCTCGCTTCCTCCTTCCCTCTCCCCCTTCCCCCCTCTCTTTAGATGGAAGTGAT  
TGTTGGGGACTTTGGGATCGTCGTGGTACCCAGGGATGCAGCGGACACAGACCGGATCATGAATCACTCC  
TCCATACTCCGCAAGTACAAAGTGAGTCCTCCA , 15  
TCACCAAAGTTGTTTCTCTCGCTTCCTCCTTCCCTCTCCCCCTTCCCCCCTCTCTTTAGATGGAAGTGAT  
TGTTGGGGACTTTGGGATCGTCGTGGTACCCAGGGATGCAGCGGACACAGACCGGATCATGAATCACTCC  
TCCATACTCCGCAAGTACAAAGTGAGTCCTCCA , 14  
TCACCAAAGTTGTTTCTCTCGCTTCCTCCTTCCCTCTCCCCCTTCCCCCCTCTCTTTAGATGGAAGTGAT  
TGTTGGGGACTTTGGGATCGTCGTGGTACCCAGGGATGCAGCGGACACAGACCGGATCATGAATCACTCC  
TCCATACTCCGCAAGTACAAAGTGAGTCCTCCA , 9  
TCACCAAAGTTGTTTCTCTCGCTTCCTCCTTCCCTCTCCCCCTTCCCCCCTCTCTTTAGATGGAAGTGAT  
TGTTGGGGACTTTGGGATCGTCGTGGTACCCAGGGATGCAGCGGACACAGACCGGATCATGAATCGCTCC  
TCCATACTCCGCAAGTACAAAGTGAGTCCTCCA , 7  
TCACCAAAGTTGTTTCTCTCGCTTCCTCCTTCCCTCTCCCCCTTCCCCCCTCTCTTTAGATGGAAGTGAT  
TGTTGGGGACTTTGGGATCGTCGTGGTACCCAGGGATGCAGCGGACACAGGCCGGATCATGAATCACTCC  
TCCATACTCCGCAAGTACAAAGTGAGTCCTCCA , 5  
TCACCAAAGTTGTTTCTCTCGCTTCCTCCTTCCCTCTCCCCCTTCCCCCCTCTCTTTAGATGGAAGTGAT  
TGTTGGGGACTTTGGGATCGTCGTGGTACCCAGGGATGCAGCGGACACAGACCGGATCATGAATCACTCC  
TCCATGCTCCGCAAGTACAAAGTGAGTCCTCCA , 5  
TCACCAAAGTTGTTTCTCTCGCTTCCTCCTTCCCTCTCCCCCTTCCCCCCTCTCTTTAGATGGAAGTGATT  
GTTGGGGACTTTGGGATCGTCGTGGTACCCAGGGATGCAGCGGACACAGACCGGATCATGAATCACTCCT  
CCATACTCCGCAAGTACAAAGTGAGTCCTCCA , 5  
TCACCAAAGTTGTTTCTCTCGCTTCCTCCTTCCCTCTCCCCCTTCCCCCCTCTCTTTAGATGGAAGTGAT  
TGTTGGGGACTTTGGGATCGTCGTGGTACCCAGGGATGCAGCGGACACAGACCGGATCATGAATCACTCC  
TCCACACTCCGCAAGTACAAAGTGAGTCCTCCA , 4  
TCACCAAAGTTGTTTCTCTCGCTTCCTCCTTCCCTCTCCCCCTTCCCCCCTCTCTTTAGATGGAAGTGAT  
TGTTGGGGACTTTGGGATCGTCGTGGTACCCAGGGATGCAGCGGACACAGACCGGATCATGAATCACTCC  
TCCATACTCCGCAAGTACAAAGTGAGTCCTCCA , 4  
TCACCAAAGTTGTTTCTCTCGCTTCCTCCTTCCCTCTCCCCCTTCCCCCCTCTCTTTAGATGGAAGTGGT  
TGTTGGGGACTTTGGGATCGTCGTGGTACCCAGGGATGCAGCGGACACAGACCGGATCATGAATCACTCC  
TCCATACTCCGCAAGTACAAAGTGAGTCCTCCA , 4

GEIC-Plate01-H04 TOTAL:3517 OrderedDict([('WT\_sp1', 1767), ('R232Q',  
0), ('Silent Block Mod', 1678), ('R232Q (Full ssODN)', 0), ('Silent  
Block Mod (Full ssODN)', 1514)]) [(0, 3505), (-1, 12)]  
TCACCAAAGTTGTTTCTCTCGCTTCCTCCTTCCCTCTCCCCCTTCCCCCCTCTCTTTAGATGGAAGTGAT  
TGTTGGGGACTTTGGGATCGTCGTGGTACCCAGGGATGCAGCGGACACAGACCGGATCATGAATCACTCC  
TCCATACTCCGCAAGTACAAAGTGAGTCCTCCA , 1500  
TCACCAAAGTTGTTTCTCTCGCTTCCTCCTTCCCTCTCCCCCTTCCCCCCTCTCTTTAGATGGAAGTGAT  
TGTTGGGGACTTTGGGATCGTCGTGGTACCCCGTGATGCAGCGGACACAGACCGGATCATGAATCACTCC  
TCCATACTCCGCAAGTACAAAGTGAGTCCTCCA , 1500  
TCACCAAAGTTGTTTCTCTCGCTTCCTCCTTCCCTCTCCCCCTTCCCCCCTCTCTTTAGATGGAAGTGAT  
TGTTGGGGACTTTGGGATCGTCGTGGTACCCAGGGATGCAGCGGACACAGACCGGATCATGAATCACTCC  
TCCATACTCCGCAAGTACAAAGTGAGTCCTCCA , 14  
TCACCAAAGTTGTTTCTCTCGCTTCCTCCTTCCCTCTCCCCCTTCCCCCCTCTCTTTAGATGGAAGTGAT  
TGTTGGGGACTGTGGGATCGTCGTGGTACCCCGTGATGCAGCGGACACAGACCGGATCATGAATCACTCC  
TCCATACTCCGCAAGTACAAAGTGAGTCCTCCA , 13  
TCACCAAAGTTGTTTCTCTCGCTTCCTCCTTCCCTCTCCCCCTTCCCCCCTCTCTTTAGATGGAAGTGAT  
TGTTGGGGACTTTGGGATCGTCGTGGTACCCAGGGATGCAGCGGACACAGACCGGATCATGAATCACTCC  
TCCATACTCCGCAAGTACAAAGTGAGTCCTCCA , 11

TCACCAAAGTTGTTTCTCTCGCTTCCTCCTTCCCTCTCCCCCTTCCCCCCTCTCTTTAGATGGAAGTGAT  
TGTTGGGGACTTTGGGATCGTCGTGGTACCCCGTGATGCAGCGGACACAGACCGGATCATGAATCGCTCC  
TCCATACTCCGCAAGTACAAAGTGAGTCCTCCA , 11  
TCACCAAAGTTGTTTCTCTCGCTTCCTCCTTCCCTCTCCCCCTTCCCCCCTCTCTTTAGATGGAAGTGAT  
TGTTGGGGACTTTGGGATCGTCGTGGTACCCAGGGATGCAGCGGACACAGACCGGATCATGAATCGCTCC  
TCCATACTCCGCAAGTACAAAGTGAGTCCTCCA , 7  
TCACCAAAGTTGTTTCTCTCGCTTCCTCCTTCCCTCTCCCCCTTCCCCCCTCTCTTTAGATGGAAGTGAT  
TGTTGGGGACTTTGGGATCGTCGTGGTACCACGTGATGCAGCGGACACAGACCGGATCATGAATCACTCC  
TCCATACTCCGCAAGTACAAAGTGAGTCCTCCA , 6  
TCACCAAAGTTGTTTCTCTCGCTTCCTCCTTCCCTCTCCCCCTTCCCCCCTCTCTTTAGATGGAAGTGAT  
TGTTGGGGACTTTGGGATCGTCGTGGTACCCCGTGATGCAGCGGACACAGACCGGATCATGAATCACTCC  
TCCATACTCCGCAAGTACAAAGTGAGTCCTCCA , 5  
TCACCAAAGTTGTTTCTCTCGCTTCCTCCTTCCCTCTCCCCCTTCCCCCCTCTCTTTAGATGGAAGTGATT  
GTTGGGGACTTTGGGATCGTCGTGGTACCCAGGGATGCAGCGGACACAGACCGGATCATGAATCACTCCT  
CCATACTCCGCAAGTACAAAGTGAGTCCTCCA , 4  
TCACCAAAGTTGTTTCTCTCGCTTCCTCCTTCCCTCTCCCCCTTCCCCCCTCTCTTTAGATGGAAGTGAT  
TGTTGGGGACTTTGGGATCGTCGTGGTACCCAGGGATGCAGCGGACACAGACCGGATCATGAATCACGCC  
TCCATACTCCGCAAGTACAAAGTGAGTCCTCCA , 4  
TCACCAAAGTTGTTTCTCTCGCTTCCTCCTTCCCTCTCCCCCTTCCCCCCTCTCTTTAGATGGAAGTGAT  
TGTTGGGGACTTTGGGATCGTCGTGGTACCCAGGGATGCAGCGGACACAGACCGGATCATGAATCACTCC  
TCCATACTCCGCAAGTACCAAGTGAGTCCTCCA , 4

GEIC-Plate01-H05 TOTAL:3296 OrderedDict([('WT\_sp1', 1650), ('R232Q',  
1567), ('Silent Block Mod', 0), ('R232Q (Full ssODN)', 1402), ('Silent  
Block Mod (Full ssODN)', 0)]) [(0, 3284), (-1, 10), (-29, 1),  
(-3, 1)]

TCACCAAAGTTGTTTCTCTCGCTTCCTCCTTCCCTCTCCCCCTTCCCCCCTCTCTTTAGATGGAAGTGAT  
TGTTGGGGACTTTGGGATCGTCGTGGTACCCAGGGATGCAGCGGACACAGACCGGATCATGAATCACTCC  
TCCATACTCCGCAAGTACAAAGTGAGTCCTCCA , 1458  
TCACCAAAGTTGTTTCTCTCGCTTCCTCCTTCCCTCTCCCCCTTCCCCCCTCTCTTTAGATGGAAGTGAT  
TGTTGGGGACTTTGGGATCGTCGTGGTACCCCAAGATGCAGCGGACACAGACCGGATCATGAATCACTCC  
TCCATACTCCGCAAGTACAAAGTGAGTCCTCCA , 1387  
TCACCAAAGTTGTTTCTCTCGCTTCCTCCTTCCCTCTCCCCCTTCCCCCCTCTCTTTAGATGGAAGTGAT  
TGTTGGGGACTTTGGGATCGTCGTGGTACCCAGGGATGCAGCGGACACAGACCGGATCATGAATCACTCC  
TCCATACTCCGCAAGTACAAAGTGAGTCCTCCA , 10  
TCACCAAAGTTGTTTCTCTCGCTTCCTCCTTCCCTCTCCCCCTTCCCCCCTCTCTTTAGATGGAAGTGAT  
TGTTGGGGACTTTGGGATCGTCGTGGTACCCAGGGATGCAGCGGACACAGACCGGATCATGAATCACTCC  
TCCATACTCCGCAAGTACAAAGTGAGTCCTCCA , 8  
TCACCAAAGTTGTTTCTCTCGCTTCCTCCTTCCCTCTCCCCCTTCCCCCCTCTCTTTAGATGGAAGTGAT  
TGTTGGGGACTTTGGGATCGTCGTGGTACCCAGGGATGCAGCGGACACAGACCGGATCATGAATCACTCC  
TCCATACTCCGCAAGTACAAAGTGAGTCCTCCA , 8  
TCACCAAAGTTGTTTCTCTCGCTTCCTCCTTCCCTCTCCCCCTTCCCCCCTCTCTTTAGATGGAAGTGAT  
TGTTGGGGACTTTGGGATCGTCGTGGTACCCCAAGATGCAGCGGACACAGACCGGATCATGAATCACTCC  
TCCATACTCCGCAAGTACAAAGTGAGTCCTCCA , 7  
TCACCAAAGTTGTTTCTCTCGCTTCCTCCTTCCCTCTCCCCCTTCCCCCCTCTCTTTAGATGGAAGTGAT  
TGTTGGGGACTTTGGGATCGTCGTGGTACCCAGGGATGCAGCGGACACAGACCGGATCATGAATCGCTCC  
TCCATACTCCGCAAGTACAAAGTGAGTCCTCCA , 7  
TCACCAAAGTTGTTTCTCTCGCTTCCTCCTTCCCTCTCCCCCTTCCCCCCTCTCTTTAGATGGAAGTGAT  
TGTTGGGGACTTTGGGATCGTCGTGGTACCCAGGGATGCAGCGGACACAGACCGGATCATGAATCACTCC

TCCATGCTCCGCAAGTACAAAGTGAGTCCTCCA , 7  
TCACCAAAGTTGTTTCTCTCGCTTCCTCCTTCCCTCTCCCCCTTCCCCCCTCTCTTTAGATGGAAGTGAT  
TGTTGGGGACTTTGGGATCGTCGTGGTACCCCAAGATGCAGCGGACACAGACCGGATCATGAATCACTCC  
TCCATACTCCGCAAGTACAAAGTGAGTCCTCCA , 5  
TCACCAAAGTTGTTTCTCTCGCTTCCTCCTTCCCTCTCCCCCTTCCCCCCTCTCTTTAGATGGAAGTGAT  
TGTTGGGGACTGTGGGATCGTCGTGGTACCCCAAGATGCAGCGGACACAGACCGGATCATGAATCACTCC  
TCCATACTCCGCAAGTACAAAGTGAGTCCTCCA , 5  
TCACCAAAGTTGTTTCTCTCGCTTCCTCCTTCCCTCTCCCCCTTCCCCCCTCTCTTTAGATGGAAGTGAT  
TGTTGGGGACTTTGGGATCGTCGTGGTACCCCAAGATGCAGCGGACACAGACCGGATCATGAATCACTCC  
TCCATACTCCGCAAGTACAAAGTGAGTCCTCCA , 5  
TCACCAAAGTTGTTTCTCTCGCTTCCTCCTTCCCTCTCCCCCTTCCCCCCTCTCTTTAGATGGAAGTGAT  
TGTTGGGGACTTTGGGATCGTCGTGGTACCCCAAGATGCAGCGGACACAGACCGGATCATGAATCACTCC  
TCCATACTCCGCAAGTACAAAGTGAGTCCTCCA , 4

GEIC-Plate01-H06 TOTAL:1672 OrderedDict([('WT\_sp1', 811), ('R232Q', 0), ('Silent Block Mod', 826), ('R232Q (Full ssODN)', 0), ('Silent Block Mod (Full ssODN)', 747)]) [(0, 1669), (-1, 3)]  
TCACCAAAGTTGTTTCTCTCGCTTCCTCCTTCCCTCTCCCCCTTCCCCCCTCTCTTTAGATGGAAGTGAT  
TGTTGGGGACTTTGGGATCGTCGTGGTACCCCGTATGCAGCGGACACAGACCGGATCATGAATCACTCC  
TCCATACTCCGCAAGTACAAAGTGAGTCCTCCA , 739  
TCACCAAAGTTGTTTCTCTCGCTTCCTCCTTCCCTCTCCCCCTTCCCCCCTCTCTTTAGATGGAAGTGAT  
TGTTGGGGACTTTGGGATCGTCGTGGTACCCAGGGATGCAGCGGACACAGACCGGATCATGAATCACTCC  
TCCATACTCCGCAAGTACAAAGTGAGTCCTCCA , 717  
TCACCAAAGTTGTTTCTCTCGCTTCCTCCTTCCCTCTCCCCCTTCCCCCCTCTCTTTAGATGGAAGTGAT  
TGTTGGGGACTTTGGGATCGTCGTGGTACCCCGTATGCAGCGGACACAGACCGGATCATGAATCGCTCC  
TCCATACTCCGCAAGTACAAAGTGAGTCCTCCA , 6  
TCACCAAAGTTGTTTCTCTCGCTTCCTCCTTCCCTCTCCCCCTTCCCCCCTCTCTTTAGATGGAAGTGAT  
TGTTGGGGACTTTGGGATCGTCGTGGTACCCAGGGATGCAGCGGACACAGACCGGATCATGAATCACTCC  
TCCATACTCCGCAAGTACAAAGTGAGTCCTCCA , 5  
TCACCAAAGTTGTTTCTCTCGCTTCCTCCTTCCCTCTCCCCCTTCCCCCCTCTCTTTAGATGGAAGTGAT  
TGTTGGGGACTTTGGGATCGTCGTGGTACCCAGGGATGCAGCGGACACAGACCTGATCATGAATCACTCC  
TCCATACTCCGCAAGTACAAAGTGAGTCCTCCA , 5  
TCACCAAAGTTGTTTCTCTCGCTTCCTCCTTCCCTCTCCCCCTTCCCCCCTCTCTTTAGATGGAAGTGAT  
TGTTGGGGACTTTGGGATCGTCGTGGTACCCAGGGATGCAGCGGACACAGACCGGATCATGAATCACTCC  
TCCATACTCCGCAAGTACAAAGTGAGTCCTCCA , 5  
TCACCAAAGTTGTTTCTCTCGCTTCCTCCTTCCCTCTCCCCCTTCCCCCCTCTCTTTAGATGGAAGTGAT  
TGTTGGGGACTTTGGGATCGTCATGGTACCCCGTATGCAGCGGACACAGACCGGATCATGAATCACTCC  
TCCATACTCCGCAAGTACAAAGTGAGTCCTCCA , 5  
TCACCAAAGTTGTTTCTCTCGCTTCCTCCTTCCCTCTCCCCCTTCCCCCCTCTCTTTAGATGGAAGTGAT  
TGTTGGGGACTGTGGGATCGTCGTGGTACCCCGTATGCAGCGGACACAGACCGGATCATGAATCACTCC  
TCCATACTCCGCAAGTACAAAGTGAGTCCTCCA , 4  
TCACCAAAGTTGTTTCTCTCGCTTCCTCCTTCCCTCTCCCCCTTCCCCCCTCTCTTTAGATGGAAGTGAT  
TGTTGGGGACGTTGGGATCGTCGTGGTACCCAGGGATGCAGCGGACACAGACCGGATCATGAATCACTCC  
TCCATACTCCGCAAGTACAAAGTGAGTCCTCCA , 4  
TCACCAAAGTTGTTTCTCTCGCTTCCTCCTTCCCTCTCCCCCTTCCCCCCTCTCTTTAGATGGAAGTGAT  
TGTTGGGGACTTTGGGATCGTCGTGGTACCACGTGATGCAGCGGACACAGACCGGATCATGAATCACTCC  
TCCATACTCCGCAAGTACAAAGTGAGTCCTCCA , 4  
TCACCAAAGTTGTTTCTCTCGCTTCCTCCTTCCCTCTCCCCCTTCCCCCCTCTCTTTAGATGGAAGTGAT  
TGTTGGGGACTTTGGGATCGTCGTGGTACCCAGGGATGTAGCGGACACAGACCGGATCATGAATCACTCC

TCCATACTCCGCAAGTACAAAGTGAGTCCTCCA , 3  
TCACCAAAGTTGTTTCTCTCGCTTCCTCCTTCCCTCTCCCCCTTCCCCCCTCTCTTTAGATGGAAGTGAT  
TGTTGGGGACTTTGGGATCGTCGTGGTACCCAGGTGATGCAGCGGACACAGACCGGATCATGAATCACTCC  
TCCATACTCCGCAAGTACAAAGTGAGTCCTCCA , 3

GEIC-Plate01-H07 TOTAL:260 OrderedDict([('WT\_sp1', 248), ('R232Q', 0),  
('Silent Block Mod', 0), ('R232Q (Full ssODN)', 0), ('Silent Block Mod  
(Full ssODN)', 0)]) [(0, 259), (-2, 1)]

TCACCAAAGTTGTTTCTCTCGCTTCCTCCTTCCCTCTCCCCCTTCCCCCCTCTCTTTAGATGGAAGTGAT  
TGTTGGGGACTTTGGGATCGTCGTGGTACCCAGGGATGCAGCGGACACAGACCGGATCATGAATCACTCC  
TCCATACTCCGCAAGTACAAAGTGAGTCCTCCA , 214

TCACCAAAGTTGTTTCTCTCGCTTCCTCCTTCCCTCTCCCCCTTCCCCCCTCTCTTTAGATGGAAGTGAT  
TGTTGGGGACTTTGGGATCGTCGTGGTACCCAGGGATGCAGCGGACACAGACCGGATCATGAATCACTCC  
TCCATACTCCGCAAGTACAAAGTGAGTCCTCCA , 3

TCACCAAAGTTGTTTCTCTCGCTTCCTCCTTCCCTCTCCCCCTTCCCCCCTCTCTTTAGATGGAAGTGAT  
TGTTGGGGACTTTGGGATCGTCGTGGTACCCAGGGATGCAGCGGACACAGACCGGATCATGAATCACTCC  
TCCATACTCCGCAAGTACAAAGTGAGTCCTCCA , 2

TCACCAAAGTTGTTTCTCTCGCTTCCTCCTTCCCTCTCCCCCTTCCCCCCTCTCTATAGATGGAAGTGAT  
TGTTGGGGACTTTGGGATCGTCGTGGTACCCAGGGATGCAGCAGACTCAGACCGGACCATGAATCACTCC  
GCCATACTCCGCAAGTACAAAGTGAGTCCTCCA , 1

TCACCAAAGTTGTTTCTCTCGCTTCCTCCTTCCCTCTCCCCCTTCCCCCCTCTCTTTAGATGGAAGTGAT  
TGTTGGGGACTTTGGGATCGTCGTGGTACCCAGGGATGCAGCGGACACAGACCGGATCATGAATCACTCC  
TCCATACTCCGCAAGTACAAATTGAGTCCTCCA , 1

TCACCAAAGTTGTTTCTCTCGCTTCCTCCTTCCCTCTCCCCCTTCCCCCCTCTCTTTAGATGGAAGTGAT  
TGTTGGGGACTTTGGGATCGTCGTGGTACCCAGGGATGCAGCGGACACAGCCCGGATCATGAATCACTCC  
TCCATACTCCGCAAGTACAAAGTGAGTCCTCCA , 1

TCACCAAAGTTGTTTCTCTCGATTGCTCCTTCCCTCTCCCCCTTCCCCCCTCTCTTTAGGTTGAAGTGAT  
TGTTGGGGACTTTGGGATCGTCGTGGTACCCAGAGATGCAGCGGACACAGAACGAATCATGGATCACTCC  
TCCATACTCCGCATGTACGAAGTGAGTCCTCCA , 1

TCACCAAAGTTGTTTCTCTCGCTTCCTCCTTCCCTCTCCCCCTTCCCCCCTCTCTTTAGATGGAAGTGAT  
TGTTGGGGACTTTGGGATCGTCGTGGTACTCAGGGATGCAGCGGACACAGACCGGATCATGAATCACTCC  
TCCATACTCCGCAAGTACAAAGTGAGTCCTCCA , 1

TCACCAAAGTTGTTTCTCTCGCTTCCTCCTTCCCTCTCCCCCTTCCCCCCTCTCTTTAGATGGAAGTGAT  
TGTTGGGGACTTTGGGATCGTCGTGGTACCCAGGGATGCAGCGGACACAGACCGGATCATGAATCACTCC  
TCCATACTCCGCAAGTACAAAGTGAGTCCTCCA , 1

TCACCAAAGTTGTTTCTCTCGCTTCCTCCTTCCCTCTCCCCCTTCCCCCCTCTCTTTAGATGGAAGTGAT  
TGTTGGGGTCTTTGGGATCGTCGTGGTCCCAGGGATGCAGCGGACACAGACCGGATCATGAATCGCTCC  
TCCATACTCCGCAAGTACAAAGTGAGTCCTCCA , 1

TCACCAAAGTTGTTTCTCTCGCTTCCTCCTTCCCTCTCCCCCTTCCCCCCTCTCTTTAGATGGAAGTGAT  
TGTTGGGGACTTTGGGATCGTCGTGGTACCCAGGGATGCAGCGGACACAGACCGGATCATGAATCACTCC  
TCCATACTCCGCAAGTACAAAGTGAGTCCTCCA , 1

TCACCAAAGTTGTTTCTCTCGCTTCCTCCTTCCCTCTCCCCCTTCCCCCCTCTCTTTAGATGGAAGTGAT  
TGTTGGGGACTTTGGGATCGCCGTGGTACCCAGGGATGCAGCGGACACAGACCGGATCATGAATCACTCC  
TCCATACTCCGCAAGTACAAAGTGAGTCCTCCA , 1
