# Supplementary material for: Macrophage depletion blocks congenital SARM1-dependent neuropathy
Source: JCI journal article supplement (doi:10.1172/jci159800), 2022-10-26
Supplement: sd1 [file 1]

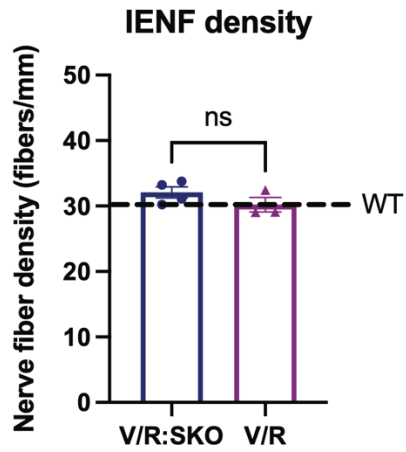

**Supplemental Figure 1: Intraepidermal nerve fiber density is unaffected in *Nmnat2*<sup>V98M/R232Q</sup> mice.** Intraepidermal nerve fiber density of footpad skin of 12-month-old *Nmnat2*<sup>V98M/R232Q</sup>; *Sarm1* KO (n=4) and *Nmnat2*<sup>V98M/R232Q</sup> (n=3) mice. All data are presented as mean ± SEM. Statistical significance was determined by Student's unpaired t-test. ns: not significant.

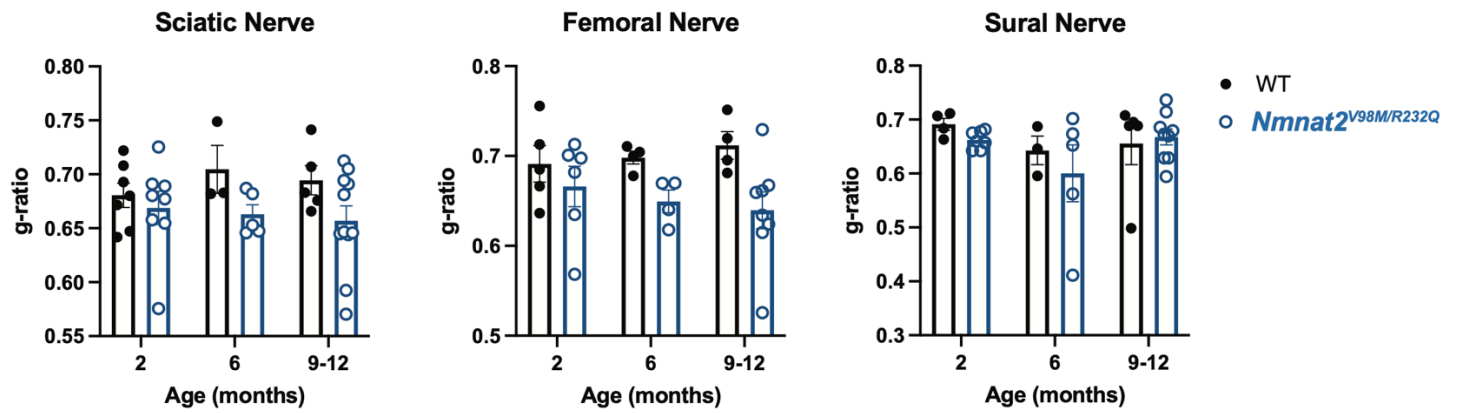

**Supplemental Figure 2: Myelin thickness is preserved in *Nmnat2*<sup>V98M/R232Q</sup> mice.** Average g-ratio in sciatic, femoral, and sural nerves at 2, 6, and 9-12 months of age, comparing *Nmnat2*<sup>V98M/R232Q</sup> mice (n=3-7) to WT mice (n=4-7). All data are presented as mean ± SEM.

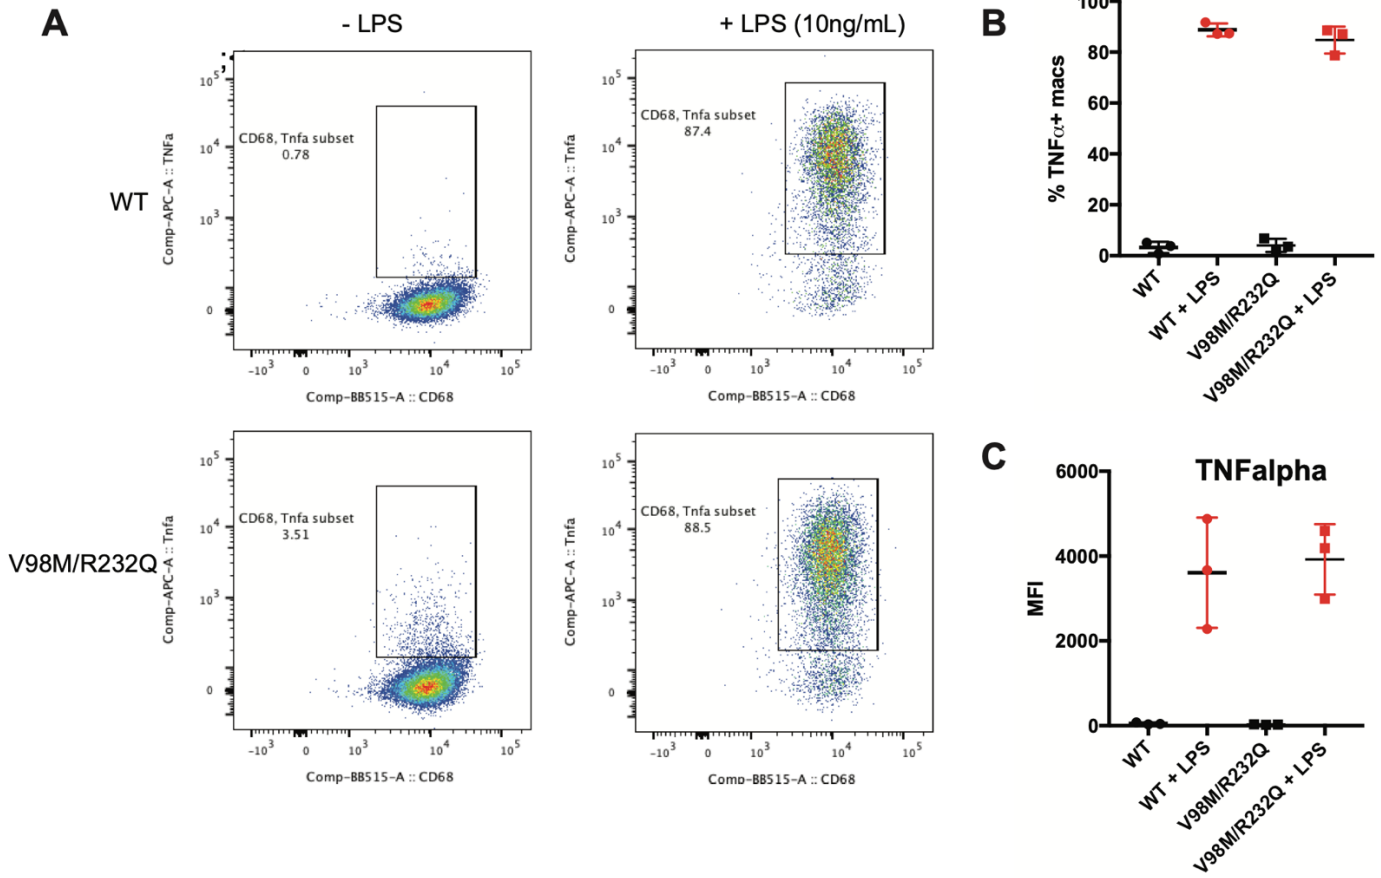

**Supplemental Figure 3: Macrophage activation assay.** **A-B**, Representative scatter plots (A) and quantification (B) of CD68<sup>+</sup> TNF- $\alpha$ <sup>+</sup> *Nmnat2*<sup>V98M/R232Q</sup> or WT peritoneal macrophages in the presence or absence of LPS (10ng/mL) stimulation for 4hrs (n=3). **C**, Mean fluorescence intensity (MFI) of TNF- $\alpha$  cell surface expression on CD68<sup>+</sup>TNF $\alpha$ <sup>+</sup> peritoneal macrophages in the presence or absence of LPS (10ng/mL) stimulation for 4hrs. All data are presented as mean  $\pm$  SEM.

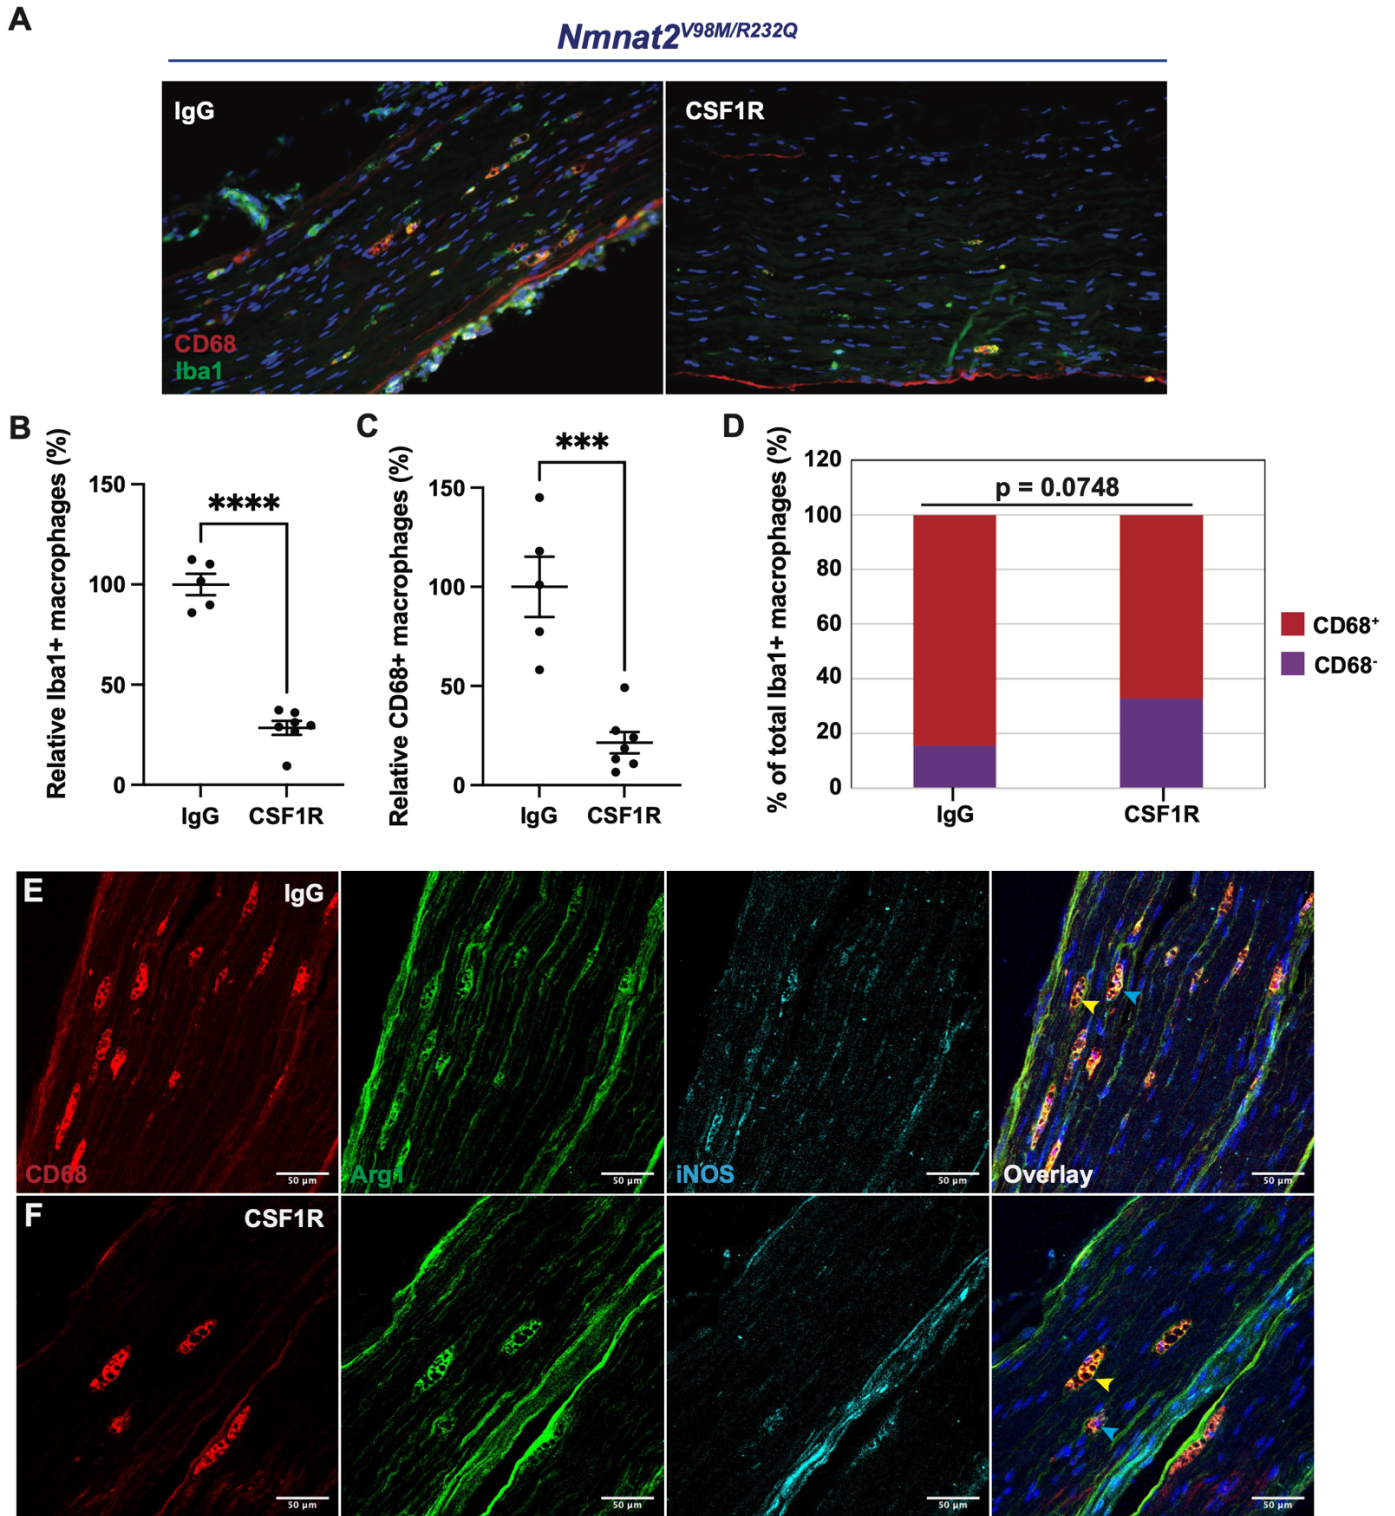

**Supplemental Figure 4: Macrophage depletion quantification.** **A**, Representative images of Iba1<sup>+</sup> and CD68<sup>+</sup> cells in *Nmnat2*<sup>V98M/R232Q</sup> sciatic nerves after 3 months of IgG or CSF1R injections. **B-C**, Quantification of (B) Iba1<sup>+</sup> and (C) CD68<sup>+</sup> macrophages in the sciatic nerves of CSF1R-injected (n=7) or IgG-injected (n=5) *Nmnat2*<sup>V98M/R232Q</sup> mice (reported as a percentage of the IgG control). **D**, Quantification of the relative distribution of CD68<sup>-</sup> and CD68<sup>+</sup> total macrophages (Iba1<sup>+</sup>) in the sciatic nerves of CSF1R-injected (n=7) or IgG-injected (n=5) *Nmnat2*<sup>V98M/R232Q</sup> mice. **E**, Representative images of CD68, Arg1, and iNOS immunofluorescence in *Nmnat2*<sup>V98M/R232Q</sup> sciatic nerves after 3 months of (E) IgG or (F) CSF1R injections. Scale bar represents 50 μm. Yellow arrows indicate Arg1/CD68 co-localization and blue arrows represent Arg1/iNOS/CD68 co-localization. All data are presented as mean ± SEM. Statistical significance was determined by Student's unpaired t-test. \*\*\*p<0.001, \*\*\*\*p<0.0001.
